# Supplementary material for: Patients with mesenchymal tumours and high Fusobacteriales prevalence have worse prognosis in colorectal cancer (CRC)
Source: HighWire-hosted journal article supplement (doi:10.1136/gutjnl-2021-325193), 2021-09-08
Supplement: gutjnl-2021-325193supp002_data_supplement.xlsx [file gutjnl-2021-325193supp002_data_supplement.xlsx]

## Sheet: Taxonomy cohort (n=140)
Supplementary Table 2
patient_id	Fusobacterium_nucleatum
GSM2772123	0
GSM2772124	2.4495e-05
GSM2772125	0.001922
GSM2772126	4.695e-06
GSM2772127	3.12e-06
GSM2772128	0
GSM2772129	0.0008335
GSM2772130	0.0058885
GSM2772131	3.26e-05
GSM2772132	0
GSM2772133	5.53e-06
GSM2772135	5.08e-05
GSM2772136	0.0445615
GSM2772137	7.85e-07
GSM2772138	0
GSM2772139	0
GSM2772140	0
GSM2772141	1.0325e-05
GSM2772142	0.0160435
GSM2772143	0
GSM2772144	9.378e-06
GSM2772146	0.0001725
GSM2772147	0.0001305
GSM2772148	0
GSM2772150	2.8e-08
GSM2772152	4.125e-06
GSM2772153	0.00011835
GSM2772155	0.0037675
GSM2772156	0
GSM2772157	0.003488
GSM2772158	0.0131775
GSM2772159	3.041e-05
GSM2772160	0
GSM2772162	0.000201
GSM2772163	0
GSM2772164	6.055e-05
GSM2772165	0.00018
GSM2772166	0.000324
GSM2772167	2.43e-05
GSM2772169	9.22e-06
GSM2772171	9.03e-05
GSM2772172	0.023912
GSM2772173	3.435e-08
GSM2772174	0
GSM2772176	0
GSM2772177	2.206e-05
GSM2772178	4.425e-08
GSM2772179	0.000145
GSM2772180	6.54e-05
GSM2772181	0
GSM2772182	0.00011415
GSM2772183	1.24e-05
GSM2772184	0.0014035
GSM2772185	0.000145
GSM2772186	0
GSM2772187	0.000164
GSM2772188	0
GSM2772189	0.002913
GSM2772190	0.015713
GSM2772191	2.68e-07
GSM2772192	0
GSM2772193	3.51475e-06
GSM2772194	0.000139
GSM2772195	0.020783
GSM2772196	0.0008535
GSM2772197	0
GSM2772198	0.003468
GSM2772199	0.0020315
GSM2772200	2.9615e-05
GSM2772201	0.0002505
GSM2772202	0
GSM2772203	0.0028395
GSM2772204	0.0184015
GSM2772205	0
GSM2772206	4.737e-05
GSM2772207	0.0005185
GSM2772208	6.485e-05
GSM2772209	1.33e-05
GSM2772210	1.165e-05
GSM2772211	4.795e-06
GSM2772212	0.0027575
GSM2772213	0
GSM2772214	5.7e-08
GSM2772215	0
GSM2772218	0.000751
GSM2772219	0
GSM2772220	0
GSM2772221	0
GSM2772222	0.000814
GSM2772223	1.86e-05
GSM2772224	0
GSM2772225	0.0004635
GSM2772226	0.0008745
GSM2772227	8.25e-08
GSM2772228	1e-05
GSM2772229	8.8e-06
GSM2772230	0.0005435
GSM2772231	0.0200535
GSM2772232	0
GSM2772233	0.0002455
GSM2772234	0.0002165
GSM2772235	6.95e-06
GSM2772236	1.12e-05
GSM2772237	0.001337
GSM2772238	1.015e-05
GSM2772239	0.0010905
GSM2772240	0.0005605
GSM2772241	8.25e-06
GSM2772242	0
GSM2772243	0
GSM2772244	0.0003095
GSM2772245	0.0030625
GSM2772246	0
GSM2772247	0
GSM2772248	0.0023425
GSM2772249	1.826e-05
GSM2772250	0
GSM2772251	0
GSM2772252	0.000165
GSM2772253	1.975e-06
GSM2772254	3.635e-05
GSM2772255	0.00016985
GSM2772256	0
GSM2772257	1.62475
GSM2772258	0
GSM2772259	0
GSM2772260	0.0001085
GSM2772261	0.0001015
GSM2772262	2.4825e-05
GSM2772263	0.49924
GSM2772264	0.323097
GSM2772265	0.0383745
GSM2772266	0.0388815
GSM2772267	0.0001145
GSM2772268	1.2543e-05
GSM2772269	0.0016195
GSM2772270	0
GSM2772272	0
GSM2772273	0
GSM2772277	8.99e-05

## Sheet: TCGA-COAD-READ cohort (n=605)
Supplementary Table 2
Family		Fusobacteriaceae										Leptotrichiaceae
Genus			Fusobacterium							Other			Leptotrichia			Other
Species				Fusobacterium_nucleatum	Fusobacterium_periodonticum	Fusobacterium_massiliense	Fusobacterium_necrophorum	Fusobacterium_gonidiaformans	Other		Other			Leptotrichia_buccalis	Other		Other
Level	Order	Family	Genus	Species	Species	Species	Species	Species	Species	Genus	Species	Family	Genus	Species	Species	Genus	Species
Label	Fusobacteriales	Fusobacteriaceae	Fusobacterium	Fusobacterium_nucleatum	Fusobacterium_periodonticum	Fusobacterium_massiliense	Fusobacterium_necrophorum	Fusobacterium_gonidiaformans	Other	Other	Other	Leptotrichiaceae	Leptotrichia	Leptotrichia_buccalis	Other	Other	Other
patient_id
TCGA-3L-AA1B	0	0	0	0	0	0	0	0	0	0	0	0	0	0	0	0	0
TCGA-4N-A93T	0.0738527	0.0737745	0.0737745	0.00134135	0	0.00134135	0.0116251	0.030404	0.0290627	0	0	7.81956e-05	7.81956e-05	0	7.81956e-05	0	0
TCGA-4T-AA8H	0	0	0	0	0	0	0	0	0	0	0	0	0	0	0	0	0
TCGA-5M-AAT4	3.9369	2.46597	2.46597	2.13302	0.139431	0.0693867	0.00865254	0.026124	0.0893541	0	0	1.47093	1.47093	0.751535	0.719397	0	0
TCGA-5M-AAT5	3.2077	3.2067	3.20379	1.73277	0.818165	0.328638	0.0155181	0.0183396	0.290356	0.00291309	0.00291309	0.000993478	0.000993478	0.000397391	0.000596087	0	0
TCGA-5M-AAT6	0.22975	0.153702	0.152181	0.133083	0	0	0	8.60267e-05	0.0190119	0.00152095	0.00152095	0.0760476	0.0760476	0.0380238	0.0380238	0	0
TCGA-5M-AATA	0.135708	0.0813778	0.0813778	0	5.8799e-05	0	0	0	0.081319	0	0	0.0543303	0.0543303	5.8799e-05	0.0542715	0	0
TCGA-5M-AATE	0	0	0	0	0	0	0	0	0	0	0	0	0	0	0	0	0
TCGA-A6-2671	0.162761	0.0724818	0.0704683	0.0477612	0.0119235	0.0047944	0.000851028	0.000851028	0.00428713	0.00201343	0.00201343	0.0902788	0.0859123	0.00674373	0.0791686	0.00436647	0.00436647
TCGA-A6-2672	0.360615	0.180819	0.175691	0.0712472	0.0744302	0.0148961	0.00107112	0.00332879	0.0107171	0.0051285	0.0051285	0.179796	0.152038	0.0211338	0.130904	0.0277584	0.0277584
TCGA-A6-2674	1.62423	1.48322	1.47495	1.22921	0.0963207	0.0621522	0.00786166	0.01301	0.066402	0.00827134	0.00827134	0.14101	0.133615	0.0209203	0.112694	0.00739511	0.00739511
TCGA-A6-2675	0.379433	0.253033	0.248665	0.180572	0.0132419	0.0253577	0.00421334	0.00421334	0.0210667	0.00436862	0.00436862	0.1264	0.1264	0.0632001	0.0632001	0	0
TCGA-A6-2676	4.24659	4.14417	4.12554	3.09579	0.432997	0.275906	0.0307643	0.0486603	0.241421	0.0186331	0.0186331	0.102421	0.084541	0.00510936	0.0794316	0.0178797	0.0178797
TCGA-A6-2677	4.99325	4.96699	4.94303	4.06167	0.393432	0.217083	0.0227819	0.036155	0.211916	0.0239562	0.0239562	0.0262594	0.0215558	0.00309518	0.0184606	0.00470361	0.00470361
TCGA-A6-2678	0.684992	0.635203	0.632197	0.512217	0.05523	0.0292041	0.00487988	0.00619484	0.0244711	0.00300597	0.00300597	0.0497897	0.0466381	0.0198285	0.0268097	0.00315163	0.00315163
TCGA-A6-2680	1.83133	1.53624	1.51278	1.07218	0.204238	0.105334	0.0147764	0.0256007	0.0906554	0.0234565	0.0234565	0.295092	0.282277	0.0159513	0.266326	0.0128149	0.0128149
TCGA-A6-2681	1.76128	1.72864	1.71524	0.686397	0.112209	0.0770218	0.0118841	0.0218598	0.805866	0.0134022	0.0134022	0.0326386	0.0260413	0.00692672	0.0191146	0.0065973	0.0065973
TCGA-A6-2682	1.3392	0.883822	0.877305	0.616902	0.115275	0.0561393	0.00676688	0.012507	0.069714	0.00651713	0.00651713	0.455377	0.432143	0.13673	0.295414	0.0232336	0.0232336
TCGA-A6-2683	0.0455948	0.0253164	0.015506	0.00860813	0.00129173	0.00224215	7.55104e-05	0.000313509	0.00297497	0.00981041	0.00981041	0.0202784	0.0172556	0.00776021	0.0094954	0.00302275	0.00302275
TCGA-A6-2684	0.118032	0.0463453	0.042667	0.0221438	0.00481228	0.00281373	0.000256806	0.000913224	0.0117272	0.0036783	0.0036783	0.0716864	0.0636058	0.0128355	0.0507703	0.00808058	0.00808058
TCGA-A6-2685	0.165986	0.146233	0.136905	0.0853842	0.0218566	0.0139458	0.00089231	0.00209121	0.0127354	0.00932791	0.00932791	0.019753	0.0190804	0.00471351	0.0143669	0.000672615	0.000672615
TCGA-A6-2686	11.1291	11.1247	11.095	2.41793	0.224959	0.269132	0.0392781	0.0927575	8.05094	0.029684	0.029684	0.00446237	0.00446237	0	0.00446237	0	0
TCGA-A6-3807	0.0491324	0.0394141	0.0390925	0.0271477	0.00238897	0.00237629	2.65589e-05	0.000563639	0.00658935	0.000321658	0.000321658	0.00971833	0.00971833	0.00281967	0.00689866	0	0
TCGA-A6-3808	0.0587493	0.0299195	0.0287906	0.0217034	0.00256878	0.000964269	0	0.000354748	0.00319935	0.00112893	0.00112893	0.0288298	0.0272008	1.55697e-05	0.0271853	0.00162894	0.00162894
TCGA-A6-3809	13.736	13.3301	13.2662	11.4009	0.665603	0.488199	0.0516834	0.118147	0.541659	0.0639134	0.0639134	0.405919	0.36207	0.0499422	0.312128	0.0438494	0.0438494
TCGA-A6-3810	12.0534	7.16952	7.12598	5.90631	0.437835	0.291168	0.0428417	0.0833339	0.364489	0.0435474	0.0435474	4.88386	4.64712	1.3782	3.26892	0.236736	0.236736
TCGA-A6-4105	7.10922	4.32177	4.31048	3.45348	0.38693	0.21661	0.0241946	0.0380666	0.191202	0.011286	0.011286	2.78745	2.68399	0.92212	1.76187	0.10346	0.10346
TCGA-A6-4107	0.303755	0.207831	0.204603	0.0845057	0.0340012	0.00774	0.00300787	0.00164684	0.0737018	0.00322771	0.00322771	0.095924	0.0904745	0.0296363	0.0608382	0.00544947	0.00544947
TCGA-A6-5656	0.276374	0.172935	0.172466	0.143661	0.0144492	0.00688832	0.000235219	0.000909144	0.0063233	0.000468822	0.000468822	0.103439	0.0226837	0.00324312	0.0194406	0.0807553	0.0807553
TCGA-A6-5657	0.323658	0.323658	0.323658	0	0	0	0.0497936	0.182576	0.0912882	0	0	0	0	0	0	0	0
TCGA-A6-5659	4.2468	4.04505	4.00709	0.235247	0.0478632	0.0516927	0.00752557	0.0308809	3.63388	0.0379567	0.0379567	0.201749	0.0818501	0.00968079	0.0721693	0.119899	0.119899
TCGA-A6-5660	2.32636	2.19225	2.18709	0.701806	0.12609	0.027224	0.0472838	0.878332	0.406354	0.00515823	0.00515823	0.134114	0.128956	0.0103165	0.118639	0.00515823	0.00515823
TCGA-A6-5661	0.102506	0.0633488	0.0604793	0.0362855	0.00923888	0.00397496	0.000373421	0.00119292	0.00941362	0.00286945	0.00286945	0.0391575	0.0350686	0.00865511	0.0264135	0.00408896	0.00408896
TCGA-A6-5662	0	0	0	0	0	0	0	0	0	0	0	0	0	0	0	0	0
TCGA-A6-5664	7.54689	7.51991	7.48765	6.39068	0.462593	0.278541	0.015395	0.0428644	0.297569	0.0322622	0.0322622	0.0269783	0.0269783	0	0.0269783	0	0
TCGA-A6-5665	8.21869	8.14071	8.08062	6.45433	0.577784	0.455353	0.0487591	0.118644	0.425742	0.0600907	0.0600907	0.0779775	0.0515608	0.00603351	0.0455273	0.0264166	0.0264166
TCGA-A6-5666	0.388726	0.388726	0.388726	0.227682	0.136054	0.0249895	0	0	0	0	0	0	0	0	0	0	0
TCGA-A6-5667	0.0795526	0	0	0	0	0	0	0	0	0	0	0.0795526	0.0795526	0	0.0795526	0	0
TCGA-A6-6137	0.541673	0.538019	0.532014	0.461709	0.0239519	0.0220901	0.00297237	0.00297237	0.0183177	0.00600543	0.00600543	0.00365429	0.00239873	0.000610571	0.00178816	0.00125555	0.00125555
TCGA-A6-6138	0	0	0	0	0	0	0	0	0	0	0	0	0	0	0	0	0
TCGA-A6-6140	4.08317	3.97099	3.93411	3.54329	0.181403	0.10537	0.0164748	0.0164748	0.0710974	0.036877	0.036877	0.112178	0.112178	0	0.112178	0	0
TCGA-A6-6141	0.00156385	0.000934749	0.000359486	8.98714e-05	8.98714e-05	8.98714e-05	0	0	8.98714e-05	0.000575264	0.000575264	0.0006291	0.000539229	0.000179743	0.000359486	8.98714e-05	8.98714e-05
TCGA-A6-6142	0.103279	0.0516394	0.0516394	0.0516394	0	0	0	0	0	0	0	0.0516394	0.0516394	0	0.0516394	0	0
TCGA-A6-6648	0	0	0	0	0	0	0	0	0	0	0	0	0	0	0	0	0
TCGA-A6-6649	0.0210253	0.0210253	0.0210253	0.0210253	0	0	0	0	0	0	0	0	0	0	0	0	0
TCGA-A6-6650	0.02322	0.0149642	0.0148741	0.00349249	0.000391002	0.00140927	0.000170593	0.00032516	0.00908557	9.00985e-05	9.00985e-05	0.00825583	0.0072045	0.000701481	0.00650301	0.00105133	0.00105133
TCGA-A6-6651	0.000132073	0.000132073	0.000132073	0.000132073	0	0	0	0	0	0	0	0	0	0	0	0	0
TCGA-A6-6652	0	0	0	0	0	0	0	0	0	0	0	0	0	0	0	0	0
TCGA-A6-6653	0.070715	0.070715	0.0705141	0	0.0462193	0	0	0	0.0242948	0.000200954	0.000200954	0	0	0	0	0	0
TCGA-A6-6654	0.0934042	0.0932694	0.0930233	0.0930233	0	0	0	0	0	0.000246088	0.000246088	0.000134816	0.000134816	0.000134816	0	0	0
TCGA-A6-6780	15.7796	13.8468	13.7772	11.6522	0.819008	0.508113	0.042578	0.098372	0.656901	0.0696385	0.0696385	1.93281	1.8587	0.319791	1.5389	0.0741109	0.0741109
TCGA-A6-6781	8.25369	8.14276	8.07017	6.08268	0.883257	0.47839	0.0424504	0.0793518	0.504043	0.0725942	0.0725942	0.110924	0.0754219	0.012342	0.0630799	0.0355021	0.0355021
TCGA-A6-6782	4.71793e-05	4.71793e-05	0	0	0	0	0	0	0	4.71793e-05	4.71793e-05	0	0	0	0	0	0
TCGA-A6-A565	0.115181	0.0822929	0.0822568	0.0328883	0.0493325	0	0	0	3.60617e-05	3.60617e-05	3.60617e-05	0.0328883	0.0328883	0.0164442	0.0164442	0	0
TCGA-A6-A566	3.56765	3.56765	3.56755	2.92852	0.236168	0.197279	0.007815	0.0531854	0.144577	0.000104074	0.000104074	0	0	0	0	0	0
TCGA-A6-A567	0.75285	0.5019	0.5019	0.403312	0.0672187	0.0313687	0	0	0	0	0	0.25095	0.10038	0.05019	0.05019	0.15057	0.15057
TCGA-A6-A56B	0	0	0	0	0	0	0	0	0	0	0	0	0	0	0	0	0
TCGA-A6-A5ZU	0	0	0	0	0	0	0	0	0	0	0	0	0	0	0	0	0
TCGA-AA-3488	0.74385	0.709587	0.702072	0.298571	0.0590023	0.0360552	0.0361876	0.150752	0.121505	0.00751435	0.00751435	0.0342635	0.0270409	0.0119016	0.0151393	0.00722258	0.00722258
TCGA-AA-3489	1.28757	1.08941	1.08941	0.940675	0.0909766	0.0577607	0	0	0	0	0	0.198155	0.198155	0.148528	0.0496276	0	0
TCGA-AA-3492	0.0794318	0.0698864	0.0682249	0.0268721	0.00504971	0.0050313	0.000745329	0.00345676	0.0270697	0.00166148	0.00166148	0.00954543	0.00901325	0.0031229	0.00589034	0.000532186	0.000532186
TCGA-AA-3494	8.15256	6.69728	6.66973	5.21972	0.540431	0.372312	0.0502211	0.0956557	0.391392	0.027547	0.027547	1.45529	1.35801	0.499468	0.858538	0.0972809	0.0972809
TCGA-AA-3495	2.22973	2.14201	2.11846	0.980163	0.0979713	0.102738	0.0162259	0.0622721	0.859094	0.0235475	0.0235475	0.0877152	0.0696744	0.0154799	0.0541945	0.0180408	0.0180408
TCGA-AA-3496	0.0594694	0.028538	0.0223052	0.00713552	0.00184002	0.00208936	0.00127955	0.0017255	0.00823523	0.00623285	0.00623285	0.0309314	0.0270742	0.00680491	0.0202693	0.0038572	0.0038572
TCGA-AA-3502	0.115304	0.0923985	0.0907702	0.0649294	0.0135734	0.00584092	0.000125084	0.000902993	0.00539838	0.00162829	0.00162829	0.0229059	0.0217913	0.00408734	0.017704	0.00111454	0.00111454
TCGA-AA-3509	0.0631765	0.0321127	0.0321044	0.0214398	0.00402729	0.000847116	0.000186345	0.00029329	0.00531054	8.30226e-06	8.30226e-06	0.0310638	0.0230553	0.00696676	0.0160885	0.00800848	0.00800848
TCGA-AA-3510	42.3429	28.8409	28.656	20.7051	3.2682	1.88685	0.261972	0.496955	2.03694	0.184902	0.184902	13.502	12.8765	1.2772	11.5993	0.625527	0.625527
TCGA-AA-3511	0.179957	0.000202426	0.000202426	0	0.000101213	0.000101213	0	0	0	0	0	0.179755	0.179755	0	0.179755	0	0
TCGA-AA-3514	0.177818	0.0919023	0.0884733	0.0618767	0.0163511	0.0041202	0.000684259	0.001536	0.00390504	0.003429	0.003429	0.0859156	0.0607691	0.0317288	0.0290403	0.0251466	0.0251466
TCGA-AA-3516	0.0418005	0.0176891	0.0146334	0.0129814	0.000674492	0.000651068	4.06801e-05	5.38905e-05	0.000231891	0.00305568	0.00305568	0.0241114	0.00604622	0.00242266	0.00362356	0.0180652	0.0180652
TCGA-AA-3517	0.141149	0.0747543	0.0728446	0.0469702	0.00910927	0.00710041	0.000583835	0.0010468	0.00803405	0.00190971	0.00190971	0.0663952	0.0496514	0.0139362	0.0357153	0.0167438	0.0167438
TCGA-AA-3518	0.00920554	0.00915403	5.98769e-05	4.06688e-05	0	0	0	0	1.92081e-05	0.00909415	0.00909415	5.15114e-05	1.86913e-05	0	1.86913e-05	3.28201e-05	3.28201e-05
TCGA-AA-3519	2.32698	2.18327	2.15116	0.17888	0.0435639	0.0529443	1.04778	0.381685	0.446302	0.0321133	0.0321133	0.143707	0.111215	0.0278435	0.0833718	0.0324914	0.0324914
TCGA-AA-3520	0.078785	0.0348546	0.0344738	0.0191528	0.00125484	0.00634024	0	0	0.00772592	0.000380758	0.000380758	0.0439304	0.038423	0.0046818	0.0337412	0.0055074	0.0055074
TCGA-AA-3521	14.3863	14.3106	14.2502	10.9031	1.32355	0.886318	0.11909	0.176324	0.841838	0.0603876	0.0603876	0.0756953	0.0635292	0.0102365	0.0532927	0.0121662	0.0121662
TCGA-AA-3522	0.0396971	0.033615	0.0334797	0.0239215	0.00312935	0.000680039	0.000274236	0.00181126	0.00366332	0.00013533	0.00013533	0.00608205	0.00606159	1.44702e-05	0.00604712	2.04523e-05	2.04523e-05
TCGA-AA-3525	6.53882	6.5064	6.47728	5.04466	0.547306	0.380506	0.0447823	0.0733482	0.386678	0.0291195	0.0291195	0.0324275	0.0205261	0.00614136	0.0143847	0.0119014	0.0119014
TCGA-AA-3526	6.44359	6.43558	6.41516	2.23557	1.18989	0.294151	0.0350362	0.0362173	2.6243	0.0204215	0.0204215	0.00800601	0.00105005	0	0.00105005	0.00695597	0.00695597
TCGA-AA-3527	0.242506	0.0684682	0.0676469	0.0411866	0.00763666	0.00387513	0.000421154	0.00135386	0.0131735	0.000821221	0.000821221	0.174038	0.00908721	0.00368054	0.00540667	0.164951	0.164951
TCGA-AA-3529	0.498174	0.374722	0.373196	0.290286	0.0316886	0.0206271	0.00378465	0.00544772	0.021362	0.00152608	0.00152608	0.123452	0.102527	0.0329561	0.0695705	0.0209249	0.0209249
TCGA-AA-3530	0.144235	0.0721231	0.0720565	0.0582818	0.00392713	0.000654058	0.000654058	0.000654058	0.00788541	6.65606e-05	6.65606e-05	0.0721116	0.0720382	0.0102108	0.0618274	7.34147e-05	7.34147e-05
TCGA-AA-3531	0.0360027	0.0168209	0.0166242	0.0116253	0.000232506	0.000232506	0	0	0.00453387	0.000196736	0.000196736	0.0191818	0.0143863	0.00404948	0.0103368	0.00479544	0.00479544
TCGA-AA-3532	0.0533794	0.0230278	0.0226807	0.0169793	0.00101963	0.00101963	0.000250818	0.000250818	0.00316052	0.000347072	0.000347072	0.0303516	0.0303353	0.0113195	0.0190157	1.63577e-05	1.63577e-05
TCGA-AA-3534	9.51902	9.49433	9.45598	7.24491	0.970666	0.570348	0.0730877	0.103077	0.493885	0.038352	0.038352	0.0246877	0.0160648	0.00538485	0.0106799	0.00862295	0.00862295
TCGA-AA-3538	0.12254	0.111495	0.109191	0.0785545	0.00860152	0.00663029	0.000385757	0.00510056	0.00991823	0.00230415	0.00230415	0.0110447	0.011014	0.00335065	0.00766333	3.07562e-05	3.07562e-05
TCGA-AA-3542	7.34998	7.29705	7.21287	5.22946	0.807241	0.465836	0.0504764	0.120113	0.539752	0.0841785	0.0841785	0.0529288	0.0358478	0.00546823	0.0303796	0.017081	0.017081
TCGA-AA-3543	0.0167526	0.00244449	0.00112821	3.17225e-05	2.41921e-05	2.88221e-05	0	1.24881e-05	0.00103099	0.00131628	0.00131628	0.0143081	0.0142529	0.00539321	0.00885967	5.52473e-05	5.52473e-05
TCGA-AA-3544	0.109229	0.059773	0.0578503	0.0313714	0.00569374	0.0133939	0.00106796	0.00148652	0.00483675	0.00192274	0.00192274	0.0494562	0.0452677	0.0105158	0.0347519	0.00418846	0.00418846
TCGA-AA-3548	0.0185679	0.0152785	0.0148932	0.00871935	0.00302247	0.00126988	0.000121443	0.000296467	0.00146362	0.000385274	0.000385274	0.00328936	0.00299156	0.000568326	0.00242324	0.000297798	0.000297798
TCGA-AA-3549	10.3714	0.131912	0.116714	0.0448549	0.00797774	0.00715437	0.000881124	0.00712095	0.0487253	0.0151974	0.0151974	10.2395	9.78634	3.10851	6.67783	0.453139	0.453139
TCGA-AA-3552	0.115058	0.108243	0.107437	0.077412	0.0105995	0.00681502	0.00153583	0.00237628	0.00869853	0.000806127	0.000806127	0.00681509	0.00206622	1.14156e-05	0.0020548	0.00474887	0.00474887
TCGA-AA-3553	0.18298	0.090295	0.0901433	0.0756429	0.00506511	0.0017573	0.000227564	0.000227564	0.00722285	0.000151661	0.000151661	0.092685	0.092685	0.0134994	0.0791856	0	0
TCGA-AA-3554	2.02958	1.65565	1.62559	1.27151	0.122429	0.0873603	0.0148526	0.0240615	0.105374	0.0300675	0.0300675	0.373926	0.348433	0.0337005	0.314733	0.0254923	0.0254923
TCGA-AA-3555	1.49854	1.47779	1.46947	0.424497	0.0981623	0.0472243	0.146529	0.370322	0.382734	0.00832364	0.00832364	0.0207515	0.0186694	5.295e-05	0.0186164	0.00208215	0.00208215
TCGA-AA-3556	0.396315	0.39535	0.394492	0.304138	0.0401796	0.0220432	0.00359384	0.00420882	0.0203288	0.000857729	0.000857729	0.000965343	1.02913e-05	0	1.02913e-05	0.000955052	0.000955052
TCGA-AA-3560	0.21146	0.187644	0.184513	0.127284	0.0256031	0.0143512	0.00130987	0.00295837	0.0130065	0.00313101	0.00313101	0.0238163	0.0206437	0.0052917	0.015352	0.00317254	0.00317254
TCGA-AA-3561	0.400697	0.0161591	0.0157779	0.00854407	0.00537004	0.000301339	0	0.000604501	0.000957974	0.000381182	0.000381182	0.384538	0.0271272	0.00531272	0.0218145	0.35741	0.35741
TCGA-AA-3562	0.0957078	0.0169981	0.0155421	0.00984899	0.00234819	0.000667815	0.000897993	0.000855681	0.000923441	0.00145595	0.00145595	0.0787097	0.0638611	0.017542	0.0463192	0.0148486	0.0148486
TCGA-AA-3655	11.721	10.6735	10.6735	9.59096	0.406843	0.235763	0.0133309	0.0629063	0.363737	0	0	1.04743	1.04743	0.0199511	1.02748	0	0
TCGA-AA-3660	5.93508	5.93417	5.93396	1.97699	0.791242	0.0873487	2.04733	0.456569	0.574479	0.00020427	0.00020427	0.000917904	0.000815769	0.00020427	0.000611499	0.000102135	0.000102135
TCGA-AA-3662	0.0135642	0.0130675	0.0128442	2.26796e-05	0.0127353	2.70317e-05	0	5.92024e-05	0	0.000223315	0.000223315	0.000496638	0.000193334	5.52048e-05	0.000138129	0.000303304	0.000303304
TCGA-AA-3663	0.962592	0.170899	0.169037	0.123471	0.0411879	0.000931016	0	0.000838684	0.00260838	0.00186203	0.00186203	0.791693	0.737422	0.232668	0.504754	0.0542713	0.0542713
TCGA-AA-3664	15.0341	13.9387	13.8919	11.1193	1.10262	0.749468	0.0917572	0.159964	0.66873	0.0467809	0.0467809	1.09547	1.03568	0.0715848	0.964092	0.0597926	0.0597926
TCGA-AA-3666	0.932481	0.855327	0.844219	0.562288	0.0657867	0.0422803	0.0186664	0.0387259	0.116472	0.0111078	0.0111078	0.0771541	0.0697985	0.00571264	0.0640859	0.00735551	0.00735551
TCGA-AA-3667	15.6687	15.4816	15.3762	11.3869	1.40302	1.02955	0.189276	0.287864	1.07963	0.105422	0.105422	0.18706	0.17155	0.0235632	0.147987	0.0155103	0.0155103
TCGA-AA-3673	0.765039	0.682583	0.680651	0.530363	0.0639957	0.0357955	0.00379311	0.00916811	0.0375356	0.00193243	0.00193243	0.0824553	0.0561031	0.00131761	0.0547855	0.0263521	0.0263521
TCGA-AA-3675	8.20029	8.20029	8.18852	6.48314	0.521583	0.335407	0.0243683	0.0351092	0.788917	0.0117652	0.0117652	0	0	0	0	0	0
TCGA-AA-3678	12.2941	12.2363	12.1856	9.30577	1.18954	0.742493	0.0874204	0.140494	0.719881	0.0507433	0.0507433	0.0577782	0.0460134	0.0125334	0.03348	0.0117648	0.0117648
TCGA-AA-3679	0.205666	0.178736	0.178388	0.14732	0.0116986	0.00772665	0.00107692	0.00179365	0.00877189	0.000348414	0.000348414	0.0269295	0.0138047	0.00338809	0.0104166	0.0131248	0.0131248
TCGA-AA-3680	1.14176	1.04821	1.04296	0.824445	0.0870399	0.051426	0.00910219	0.0137643	0.0571827	0.00524977	0.00524977	0.0935527	0.0901758	0.00371455	0.0864613	0.00337687	0.00337687
TCGA-AA-3681	2.54074	2.51256	2.49962	1.93076	0.225265	0.144207	0.0192742	0.031109	0.148999	0.0129478	0.0129478	0.0281732	0.0234921	0.000240004	0.0232521	0.00468105	0.00468105
TCGA-AA-3684	2.76767	2.72202	2.7047	2.00192	0.259486	0.206456	0.0345048	0.0460185	0.156315	0.0173186	0.0173186	0.0456566	0.0423722	0.00702172	0.0353504	0.00328445	0.00328445
TCGA-AA-3685	1.92202	1.59387	1.59387	1.51583	0.0411646	0.0188415	0	0.00360604	0.0144241	0	0	0.328149	0.328149	0.0898504	0.238299	0	0
TCGA-AA-3688	0.368001	0.304748	0.301706	0.0685199	0.014256	0.0096221	0.00164706	0.00295665	0.204704	0.00304185	0.00304185	0.0632528	0.0486266	0.00843167	0.0401949	0.0146262	0.0146262
TCGA-AA-3692	0.154181	0.101488	0.0997485	0.0602712	0.0131447	0.00867093	0.000762702	0.00220687	0.014692	0.00173955	0.00173955	0.0526926	0.0504284	0.0097568	0.0406716	0.00226416	0.00226416
TCGA-AA-3693	0.155215	0.114409	0.113793	0.0675186	0.0199397	0.0112988	0.00165841	0.00198152	0.0113963	0.000615586	0.000615586	0.0408055	0.0405441	0.0076117	0.0329324	0.000261393	0.000261393
TCGA-AA-3697	0.127635	0.122514	0.122353	0.121976	0.000106834	5.83619e-05	0	9.44225e-05	0.000116724	0.000160876	0.000160876	0.00512164	0.00512164	0.00253874	0.0025829	0	0
TCGA-AA-3710	4.50011	4.47788	4.45823	3.38455	0.436787	0.255164	0.0301083	0.0494762	0.302151	0.0196486	0.0196486	0.0222253	0.0201897	0.00334134	0.0168483	0.00203566	0.00203566
TCGA-AA-3712	1.16093	1.07493	1.07493	0.533867	0.255393	0.114116	0	0.00955495	0.162	0	0	0.0859945	0.0859945	0	0.0859945	0	0
TCGA-AA-3713	0.435406	0.435342	0.435342	0.316832	0.0532085	0.0188648	0	0	0.0464365	0	0	6.37864e-05	6.37864e-05	6.37864e-05	0	0	0
TCGA-AA-3715	24.075	20.0021	19.8625	14.7647	1.83614	1.45918	0.212443	0.29412	1.29592	0.139583	0.139583	4.07295	3.8821	0.77626	3.10584	0.190852	0.190852
TCGA-AA-3811	1.35271	1.07108	1.05078	0.755865	0.0788653	0.061888	0.00685473	0.0248932	0.122417	0.0202989	0.0202989	0.281628	0.224803	0.0384222	0.186381	0.0568246	0.0568246
TCGA-AA-3812	0.535638	0.39547	0.394621	0.296751	0.0333062	0.0256245	0.00525423	0.00527771	0.0284071	0.000848383	0.000848383	0.140169	0.122403	0.00646235	0.115941	0.0177657	0.0177657
TCGA-AA-3814	7.26325	6.09179	6.07788	4.94312	0.447584	0.299909	0.0380429	0.0639064	0.285325	0.0139053	0.0139053	1.17146	1.03222	0.372026	0.660196	0.139237	0.139237
TCGA-AA-3815	4.35178	4.32045	4.29341	3.21148	0.463954	0.266723	0.0298037	0.0512223	0.270229	0.0270383	0.0270383	0.0313308	0.0232957	0.00448739	0.0188083	0.00803505	0.00803505
TCGA-AA-3818	0.174016	0.111114	0.110759	0.0645785	0.0150164	0.00766074	0.000704586	0.00185993	0.0209392	0.000354183	0.000354183	0.0629022	0.0629022	0.00723375	0.0556685	0	0
TCGA-AA-3819	0.138137	0.0843282	0.0822465	0.0529695	0.0167651	0.0055008	0	0.000532095	0.00647902	0.00208169	0.00208169	0.0538086	0.0502219	0.00968413	0.0405378	0.00358671	0.00358671
TCGA-AA-3821	0.227423	0.218428	0.215653	0.181841	0.0159221	0.00835973	0.00110749	0.00137508	0.00704818	0.00277453	0.00277453	0.00899539	0.00243467	0.000509413	0.00192526	0.00656072	0.00656072
TCGA-AA-3831	0.169006	0.138855	0.138484	0.0503558	0.0674777	0.0036286	0.000458992	0.00067793	0.015885	0.000371247	0.000371247	0.0301509	0.0292588	0.0048199	0.0244389	0.000892104	0.000892104
TCGA-AA-3833	0.098995	0.0685805	0.066694	0.0441959	0.0046963	0.00415366	0.00115105	0.00206751	0.0104296	0.00188642	0.00188642	0.0304145	0.0270114	0	0.0270114	0.00340312	0.00340312
TCGA-AA-3842	0.070898	0.0674226	0.0674226	0.0420427	0.00399097	0.00342829	0	0.0064072	0.0115535	0	0	0.00347539	0	0	0	0.00347539	0.00347539
TCGA-AA-3844	0.528311	0.408979	0.408254	0.326842	0.0368666	0.020951	0.000903685	0.00329739	0.0193936	0.000725212	0.000725212	0.119332	0.119234	0.0338933	0.0853404	9.85728e-05	9.85728e-05
TCGA-AA-3845	2.17468	2.04064	2.03322	1.1998	0.401233	0.134807	0.0106088	0.0253725	0.261399	0.00742102	0.00742102	0.134038	0.134016	0.0173727	0.116643	2.17083e-05	2.17083e-05
TCGA-AA-3846	0.509627	0.397587	0.395113	0.310995	0.0314096	0.0197282	0.00181428	0.00590804	0.0252579	0.00247395	0.00247395	0.11204	0.111501	0.0258553	0.0856458	0.000538653	0.000538653
TCGA-AA-3848	4.5244	4.48681	4.43408	3.18403	0.37573	0.287804	0.0441313	0.060712	0.48167	0.0527328	0.0527328	0.0375873	0.0306611	0.00759836	0.0230627	0.00692619	0.00692619
TCGA-AA-3850	3.26491	2.92909	2.91365	2.03038	0.244557	0.163638	0.0191509	0.0451761	0.410748	0.0154409	0.0154409	0.335817	0.327165	0.113067	0.214098	0.00865261	0.00865261
TCGA-AA-3851	0.467901	0.462128	0.460667	0.357784	0.0320826	0.0234978	0.00348981	0.00940881	0.0344041	0.00146043	0.00146043	0.00577323	0.00543062	0	0.00543062	0.000342617	0.000342617
TCGA-AA-3852	2.05118	1.82204	1.79714	0.731416	0.089841	0.0660363	0.00738492	0.0218581	0.880599	0.0249024	0.0249024	0.22914	0.200859	0.0306504	0.170209	0.028281	0.028281
TCGA-AA-3854	5.94461	2.43047	2.42444	1.83292	0.264271	0.157853	0.0160479	0.0253873	0.127964	0.00603038	0.00603038	3.51413	3.3178	0.192581	3.12522	0.19633	0.19633
TCGA-AA-3855	0.188421	0.143565	0.135684	0.0884017	0.0196044	0.00941203	0.00165934	0.00420698	0.0123993	0.00788164	0.00788164	0.0448557	0.035426	0.0140925	0.0213335	0.00942967	0.00942967
TCGA-AA-3856	0.29974	0.23668	0.235446	0.165404	0.0329897	0.0117377	0.00189492	0.00323789	0.0201815	0.0012343	0.0012343	0.0630602	0.0483522	0.00727943	0.0410728	0.014708	0.014708
TCGA-AA-3858	0.0626946	0.0348159	0.0348159	0.019937	0.00342507	0.0023806	0	0	0.00907324	0	0	0.0278786	0.0243712	0.00412818	0.020243	0.00350748	0.00350748
TCGA-AA-3860	0.249486	0.193901	0.190793	0.0657351	0.00774538	0.00868841	0	0.000955599	0.107668	0.00310775	0.00310775	0.0555854	0.0371465	0.00292988	0.0342166	0.0184389	0.0184389
TCGA-AA-3861	0.353622	0.288225	0.287717	0.207008	0.0433925	0.0187815	0.00189088	0.00392197	0.0127225	0.000507862	0.000507862	0.0653963	0.0637409	0.00108584	0.0626551	0.00165539	0.00165539
TCGA-AA-3862	0.11436	0.110423	0.10939	0.0793723	0.00974416	0.00683772	0.00135082	0.00184247	0.0102422	0.00103322	0.00103322	0.00393728	0.00205299	0.00177537	0.000277617	0.00188429	0.00188429
TCGA-AA-3864	3.39419	3.32489	3.31018	2.01433	0.664651	0.259959	0.0225086	0.0501428	0.298591	0.0147116	0.0147116	0.0692977	0.0666674	0.0153379	0.0513295	0.00263026	0.00263026
TCGA-AA-3866	0.0425671	0.00611644	0.00597901	0.00259012	0.000647529	1.8906e-05	1.8906e-05	1.8906e-05	0.00268465	0.000137432	0.000137432	0.0364507	0.0364507	0.00521804	0.0312326	0	0
TCGA-AA-3867	0.0829215	0.0746317	0.0737795	0.0298565	0.00430446	0.00242938	0.00656278	0.0194581	0.0111682	0.000852204	0.000852204	0.00828983	0.00828983	0	0.00828983	0	0
TCGA-AA-3869	0.309444	0.28897	0.28792	0.22609	0.0263856	0.016347	0.00179368	0.00305433	0.0142487	0.00105026	0.00105026	0.0204741	0.019579	8.48667e-06	0.0195705	0.000895119	0.000895119
TCGA-AA-3870	0.694441	0.648572	0.642301	0.483722	0.0603826	0.0356333	0.00538041	0.00996426	0.0472182	0.00627088	0.00627088	0.0458693	0.041509	0.00860059	0.0329084	0.00436022	0.00436022
TCGA-AA-3872	0.0596415	0.029872	0.0283823	0.0150189	0.00368529	0.00171264	0	0.000495696	0.00746973	0.00148976	0.00148976	0.0297694	0.0297694	0.00596219	0.0238073	0	0
TCGA-AA-3875	0.551793	0.489776	0.487371	0.369886	0.0417178	0.0315394	0.00307151	0.00614285	0.0350134	0.00240541	0.00240541	0.0620166	0.0602587	0.0183108	0.0419479	0.00175784	0.00175784
TCGA-AA-3877	7.83347	7.81615	7.79304	6.18328	0.605422	0.401933	0.0582812	0.100016	0.444108	0.0231081	0.0231081	0.017319	0.0119878	0.00214153	0.00984631	0.00533115	0.00533115
TCGA-AA-3930	6.6812	6.48314	6.45319	5.05721	0.580158	0.358978	0.041884	0.0651649	0.349798	0.0299502	0.0299502	0.198055	0.18565	0.0316267	0.154023	0.0124052	0.0124052
TCGA-AA-3939	0.0593758	0.0164998	0.0164535	0.013855	0.00176905	0.000829462	0	0	0	4.63076e-05	4.63076e-05	0.042876	0.042876	0.0060273	0.0368487	0	0
TCGA-AA-3941	1.12363	0.94939	0.947996	0.747377	0.0862015	0.0515758	0.00740388	0.0109826	0.0444551	0.00139396	0.00139396	0.174236	0.171085	0.0567286	0.114357	0.00315114	0.00315114
TCGA-AA-3949	6.53095	6.51234	6.4811	4.49331	0.477944	0.337731	0.0445212	0.0900981	1.0375	0.03124	0.03124	0.018611	0.0112927	0.00259975	0.00869295	0.00731832	0.00731832
TCGA-AA-3950	2.93833	2.91336	2.88476	1.41568	0.390784	0.471757	0.0447135	0.110283	0.451551	0.0285982	0.0285982	0.0249674	0.0148264	0.00103056	0.0137959	0.010141	0.010141
TCGA-AA-3952	0.037967	0.0162848	0.0135543	0.0100435	0.00168336	0.00128532	0	0.000103238	0.000438876	0.00273051	0.00273051	0.0216822	0.0182611	0.0116495	0.00661158	0.00342116	0.00342116
TCGA-AA-3955	0.150558	0.135481	0.134131	0.105042	0.0101474	0.009857	0.000320644	0.0015824	0.00718118	0.0013503	0.0013503	0.0150775	0.00181143	0.000687094	0.00112434	0.0132661	0.0132661
TCGA-AA-3956	0.0234806	0.0200232	0.0195099	0.0162193	0.00162706	0.00084349	0.000258136	0.000258136	0.00030381	0.000513246	0.000513246	0.00345744	0.000652407	0.000464995	0.000187412	0.00280503	0.00280503
TCGA-AA-3966	13.786	13.2298	13.1931	10.4802	1.07169	0.703691	0.0934224	0.143516	0.700603	0.0367259	0.0367259	0.556202	0.523955	0.0937387	0.430216	0.0322473	0.0322473
TCGA-AA-3968	0.320178	0.206274	0.2055	0.15837	0.0164174	0.00932346	0.000378343	0.000677035	0.0203335	0.000774258	0.000774258	0.113904	0.106581	0.0240165	0.0825646	0.00732251	0.00732251
TCGA-AA-3970	0.0863841	0.0167484	0.0167108	0.0134781	0.000238726	0.000557028	0	0	0.002437	3.75483e-05	3.75483e-05	0.0696357	0.040663	0.00846682	0.0321962	0.0289727	0.0289727
TCGA-AA-3971	0.0676287	0.063081	0.0630564	0.0386959	0.00724811	0.00135098	0	0	0.0157614	2.4608e-05	2.4608e-05	0.00454768	0.00453791	0	0.00453791	9.76847e-06	9.76847e-06
TCGA-AA-3972	1.45522	0.988341	0.983154	0.691571	0.123769	0.0622244	0.0078071	0.0136802	0.084102	0.00518707	0.00518707	0.466884	0.431707	0.0157689	0.415938	0.0351766	0.0351766
TCGA-AA-3973	0.486728	0.443173	0.442077	0.0742899	0.020699	0.0169777	0.158404	0.0735122	0.0981943	0.00109592	0.00109592	0.0435551	0.0373226	0.0116956	0.025627	0.00623251	0.00623251
TCGA-AA-3975	0.340912	0.28677	0.283995	0.219222	0.0312545	0.0161846	0.0025455	0.00239891	0.0123899	0.00277496	0.00277496	0.0541421	0.0519362	0.00230083	0.0496354	0.00220589	0.00220589
TCGA-AA-3977	0.653352	0.577577	0.576645	0.463099	0.045504	0.0257702	0.00305403	0.00557835	0.0336395	0.000931919	0.000931919	0.0757745	0.0673153	0.00420721	0.0631081	0.00845917	0.00845917
TCGA-AA-3979	3.45237	3.00446	2.99577	2.41147	0.223274	0.146413	0.0158511	0.0306574	0.168102	0.00869378	0.00869378	0.447906	0.415539	0.0312033	0.384336	0.0323665	0.0323665
TCGA-AA-3980	0.127929	0.0576921	0.0576791	0.0490067	0.00189621	0.000643018	0	0.000278487	0.0058547	1.29529e-05	1.29529e-05	0.070237	0.070224	0.00385607	0.0663679	1.29529e-05	1.29529e-05
TCGA-AA-3982	0.0322051	0.0161093	0.0161093	0.00938921	0.00335329	0.000670658	0	0	0.00269611	0	0	0.0160958	0.00536526	0	0.00536526	0.0107305	0.0107305
TCGA-AA-3984	1.19497	1.15782	1.15286	0.867868	0.115145	0.0653742	0.00984782	0.0150398	0.0795829	0.00496209	0.00496209	0.0371532	0.0310161	0.00760839	0.0234077	0.0061371	0.0061371
TCGA-AA-3986	0.0727662	0.0345709	0.0345147	0.0242413	0.0030751	0.00570414	0.000346143	0.000373536	0.000774465	5.62016e-05	5.62016e-05	0.0381953	0.0375524	0.0145323	0.0230201	0.00064291	0.00064291
TCGA-AA-3989	0.111574	0.103215	0.102815	0.0769987	0.0107453	0.0057253	0.000697017	0.000697017	0.0079516	0.000399885	0.000399885	0.00835878	0.00674742	0.00174403	0.00500339	0.00161136	0.00161136
TCGA-AA-3994	0.105384	0.103201	0.102692	0.0472863	0.00785766	0.00491113	0.00654549	0.0158216	0.02027	0.000509277	0.000509277	0.00218262	0.00218262	0	0.00218262	0	0
TCGA-AA-A004	12.2266	7.95216	7.79751	4.9318	0.930396	0.669681	0.115683	0.237309	0.912632	0.154656	0.154656	4.27443	4.02826	1.01153	3.01673	0.24617	0.24617
TCGA-AA-A00A	0.158493	0.14649	0.144311	0.102101	0.0153724	0.0109465	0.00192805	0.0034765	0.0104863	0.00217956	0.00217956	0.0120026	0.00827561	0.000440108	0.00783551	0.003727	0.003727
TCGA-AA-A00D	0.068983	0.0559189	0.0548411	0.00759397	0.00115566	0.00115566	0.00113409	0.00163025	0.0421715	0.00107775	0.00107775	0.0130641	0.0100656	0.00252396	0.00754161	0.00299855	0.00299855
TCGA-AA-A00F	0.236608	0.230469	0.229632	0.0906865	0.0159151	0.00871174	0.00320271	0.00524157	0.105874	0.000837251	0.000837251	0.00613834	0.00562289	0.0014828	0.00414008	0.000515451	0.000515451
TCGA-AA-A00J	1.14431	1.11505	1.10611	0.811479	0.109475	0.0814376	0.00626519	0.0139792	0.0834716	0.00894595	0.00894595	0.0292531	0.0217256	0.00627194	0.0154536	0.00752753	0.00752753
TCGA-AA-A00K	0.424845	0.364546	0.350976	0.254849	0.0339843	0.0225217	0.00339129	0.00619745	0.0300318	0.0135703	0.0135703	0.0602993	0.0508167	0.0171809	0.0336359	0.00948263	0.00948263
TCGA-AA-A00L	0.124445	0.0993799	0.0984737	0.0503379	0.0139666	0.00943199	0.00131032	0.00473205	0.0186949	0.000906232	0.000906232	0.0250655	0.0179646	0.00893478	0.00902979	0.00710092	0.00710092
TCGA-AA-A00N	0.118539	0.0896599	0.0895887	0.063632	0.00799183	0.00783783	0.000558962	0.00157707	0.00799092	7.12661e-05	7.12661e-05	0.0288792	0.0269096	0.0114147	0.0154949	0.00196968	0.00196968
TCGA-AA-A00O	2.12751	1.80559	1.79621	1.36144	0.189345	0.113391	0.00905376	0.016337	0.106641	0.00937704	0.00937704	0.321922	0.301428	0.0472132	0.254215	0.020494	0.020494
TCGA-AA-A00Q	0.43253	0.425154	0.421292	0.301472	0.0380847	0.0294963	0.004818	0.00483018	0.0425911	0.00386211	0.00386211	0.00737565	0.00548694	0.00258792	0.00289901	0.00188872	0.00188872
TCGA-AA-A00R	2.05541	1.85519	1.84974	1.46529	0.153489	0.10195	0.0143481	0.0218065	0.0928603	0.00544615	0.00544615	0.200219	0.190079	0.0208265	0.169252	0.0101407	0.0101407
TCGA-AA-A00U	0.356349	0.344697	0.338684	0.231957	0.0448436	0.0269023	0.00238233	0.00291671	0.0296821	0.00601286	0.00601286	0.0116519	0.0116225	3.94428e-05	0.011583	2.94281e-05	2.94281e-05
TCGA-AA-A00W	0.304474	0.225648	0.221958	0.140731	0.0305849	0.0114156	0.0030109	0.0106163	0.0255996	0.00368983	0.00368983	0.0788264	0.0497093	0.00960044	0.0401089	0.029117	0.029117
TCGA-AA-A00Z	1.0929	1.04995	1.04495	0.678281	0.14049	0.0666628	0.0198326	0.0571881	0.0824929	0.00499883	0.00499883	0.042957	0.0385318	0.00259004	0.0359418	0.00442518	0.00442518
TCGA-AA-A017	0.028161	0.0112205	0.0108985	0.00746023	0.00044495	0.000181415	0	0	0.00281193	0.000321939	0.000321939	0.0169406	0.0166984	0.00905877	0.00763966	0.000242155	0.000242155
TCGA-AA-A01D	0.00509957	0.000985638	0.000964491	0.000959439	0	5.05222e-06	0	0	0	2.11462e-05	2.11462e-05	0.00411394	0.0031545	0.00128839	0.00186611	0.000959439	0.000959439
TCGA-AA-A01F	0.0229612	0.0152445	0.0152086	0.0107515	0.00222815	0.000956815	0.000325092	0.000315692	0.000631384	3.59123e-05	3.59123e-05	0.00771665	0.00769974	4.37885e-05	0.00765595	1.69121e-05	1.69121e-05
TCGA-AA-A01G	0.121672	0.102325	0.101858	0.0730135	0.0113587	0.00312628	0.00148687	0.00148687	0.0113853	0.000466995	0.000466995	0.019347	0.00971729	0.00121374	0.00850355	0.00962976	0.00962976
TCGA-AA-A01I	0.0562357	0.0417948	0.0417082	0.0310977	0.00309281	0.00277928	0.000662907	0.000931653	0.00314384	8.66733e-05	8.66733e-05	0.0144408	0.00940678	0.00273406	0.00667273	0.00503406	0.00503406
TCGA-AA-A01K	0.594494	0.560149	0.558082	0.338924	0.126433	0.0390547	0.00240267	0.00846777	0.0428005	0.00206683	0.00206683	0.0343448	0.0264384	0.00819795	0.0182404	0.00790638	0.00790638
TCGA-AA-A01P	0.0791197	0.067672	0.066974	0.0490813	0.00663518	0.00526121	0.000304924	0.000632244	0.00505915	0.000698025	0.000698025	0.0114477	0.00959326	0.00069592	0.00889734	0.00185444	0.00185444
TCGA-AA-A01Q	41.3588	40.3637	40.183	30.5494	3.64866	2.29146	0.364605	0.649394	2.67954	0.180659	0.180659	0.995132	0.861519	0.270863	0.590656	0.133613	0.133613
TCGA-AA-A01R	1.18253	1.11956	1.10375	0.407431	0.0548561	0.0484409	0.309369	0.120156	0.163501	0.015806	0.015806	0.0629743	0.0512225	0.0261724	0.0250501	0.0117518	0.0117518
TCGA-AA-A01S	0.0467559	0.0309776	0.0290721	0.0215517	0.00198205	0.00144168	0	0.00140025	0.00269645	0.00190543	0.00190543	0.0157783	0.0155516	0.00614795	0.00940368	0.000226718	0.000226718
TCGA-AA-A01T	2.74895	2.64703	2.61685	1.82105	0.325279	0.209261	0.0295314	0.0408759	0.190849	0.0301842	0.0301842	0.101913	0.0853519	0.0345897	0.0507622	0.0165612	0.0165612
TCGA-AA-A01V	0.0321865	0.0236949	0.0235178	0.0022259	6.74969e-06	0.000718008	0.0121844	0.00386202	0.00452078	0.000177032	0.000177032	0.00849159	0.00710452	0.00138706	0.00571746	0.00138706	0.00138706
TCGA-AA-A01X	0.0212081	0.0141357	0.0135142	0.00233557	0.000473033	0.000480222	0.000464108	0.000479143	0.00928215	0.000621504	0.000621504	0.00707241	9.53646e-05	0	9.53646e-05	0.00697705	0.00697705
TCGA-AA-A01Z	0.0163975	0.00549726	0.00544513	0.00181752	0.00180513	0.00180513	0	0	1.7357e-05	5.21268e-05	5.21268e-05	0.0109002	0.0108308	0.00180513	0.00902564	6.9428e-05	6.9428e-05
TCGA-AA-A022	0.399545	0.32748	0.323306	0.239316	0.0333478	0.0255058	0.0025016	0.00368673	0.0189481	0.00417389	0.00417389	0.0720649	0.0685539	0.0182866	0.0502674	0.003511	0.003511
TCGA-AA-A024	0.0940784	0.0841958	0.0833422	0.0526064	0.00977316	0.00401973	0.000951264	0.00120257	0.0147891	0.00085353	0.00085353	0.00988265	0.00846249	0.0023002	0.0061623	0.00142016	0.00142016
TCGA-AA-A029	0.196942	0.190041	0.187568	0.139902	0.0205532	0.0143435	0.00164277	0.00210306	0.00902334	0.00247297	0.00247297	0.00690119	0.00690119	0.00162913	0.00527206	0	0
TCGA-AA-A02E	0.0256078	0.013651	0.0116013	0.00843868	0.00313377	1.00729e-05	0	0	1.87392e-05	0.0020497	0.0020497	0.0119568	0.00998392	6.1256e-05	0.00992266	0.00197292	0.00197292
TCGA-AA-A02F	0.201791	0.18492	0.183627	0.143365	0.0170471	0.0107504	0.000985108	0.00140421	0.0100751	0.00129356	0.00129356	0.0168711	0.0166508	0.00155256	0.0150982	0.000220301	0.000220301
TCGA-AA-A02J	0.0215704	0.0179753	0.0179753	0.00480897	0.000910437	0.000910437	0.001852	0.00390632	0.00558713	0	0	0.00359506	0.00359506	0	0.00359506	0	0
TCGA-AA-A02K	0.120911	0.0806397	0.0805431	0.0805431	0	0	0	0	0	9.6575e-05	9.6575e-05	0.0402716	0.0402716	0.0402716	0	0	0
TCGA-AA-A02O	0.39338	0.161115	0.157419	0.0856219	0.0248199	0.0166946	0.00162419	0.00337943	0.0252794	0.00369506	0.00369506	0.232265	0.222946	0.0474861	0.17546	0.00931904	0.00931904
TCGA-AA-A02R	0.0428805	0.0251932	0.0249179	0.0189705	0.00114413	0.00263183	0.000180483	0.000360966	0.00162997	0.000275349	0.000275349	0.0176873	0.0169654	0.0088617	0.00810368	0.000721931	0.000721931
TCGA-AA-A02W	0.0299383	0.0100033	0.00997944	0.00872155	0.000622968	0.000634919	0	0	0	2.39029e-05	2.39029e-05	0.019935	0.019935	0.00863849	0.0112965	0	0
TCGA-AA-A02Y	0.0889704	0.0889704	0.0889704	0.0762604	0.00635503	0.00635503	0	0	0	0	0	0	0	0	0	0	0
TCGA-AA-A03F	0.444844	0.396827	0.39481	0.292905	0.0370962	0.0289884	0.00393088	0.00654759	0.0253413	0.00201702	0.00201702	0.0480175	0.0450928	0.0115611	0.0335318	0.00292467	0.00292467
TCGA-AA-A03J	0.160056	0.0115083	0.0111152	0.00791912	0.000921169	0.000895988	0.000256506	2.10614e-05	0.00110132	0.000393137	0.000393137	0.148548	0.143774	0.030091	0.113683	0.00477409	0.00477409
TCGA-AD-5900	0.0312417	0.000233826	3.72696e-05	0	0	3.72696e-05	0	0	0	0.000196556	0.000196556	0.0310079	0.0310079	3.36969e-05	0.0309742	0	0
TCGA-AD-6548	1.08151	1.08151	1.08141	0.829035	0.092875	0.092875	0	0.00554477	0.0610843	9.17575e-05	9.17575e-05	0	0	0	0	0	0
TCGA-AD-6888	0.0592699	0.0237241	0.0237241	0	0.0236973	0	0	2.68069e-05	0	0	0	0.0355459	0.0355459	0	0.0355459	0	0
TCGA-AD-6889	23.9655	18.4846	18.4025	10.1206	5.97389	1.19101	0.0927392	0.181281	0.842941	0.0821546	0.0821546	5.48092	5.11506	0.37376	4.7413	0.365859	0.365859
TCGA-AD-6890	0.0621517	0.0621517	0.0619117	0.0619117	0	0	0	0	0	0.000239968	0.000239968	0	0	0	0	0	0
TCGA-AD-6895	0.144526	0.144433	0.14342	0.103343	0.00636233	0.00629555	0	0.00629555	0.0211232	0.001013	0.001013	9.3137e-05	9.3137e-05	3.10681e-05	6.20689e-05	0	0
TCGA-AD-6899	16.9864	7.51013	7.49484	6.21096	0.589538	0.388728	0.0319208	0.0511362	0.222556	0.0152944	0.0152944	9.47623	9.37747	0.181542	9.19593	0.0987561	0.0987561
TCGA-AD-6901	0.17806	0.17806	0.174636	0.0626478	0.0555269	0.011012	0.00202341	0.00544763	0.0379778	0.00342423	0.00342423	0	0	0	0	0	0
TCGA-AD-6963	0.169943	0.169943	0.169943	0.128009	0.0213348	0.00514979	0.00514979	0.00514979	0.00514979	0	0	0	0	0	0	0	0
TCGA-AD-6964	0.103325	0.0690513	0.0683119	0.0421156	0.0227652	0.00341478	0	0	1.63386e-05	0.000739468	0.000739468	0.0342739	0.0342739	1.88662e-05	0.0342551	0	0
TCGA-AD-6965	0.121992	0.00642063	0.00642063	0	0	0	0	0	0.00642063	0	0	0.115571	0.115571	0	0.115571	0	0
TCGA-AD-A5EJ	5.08121	5.05119	5.03918	4.52578	0.240149	0.141802	0.0159225	0.0249045	0.090622	0.0120101	0.0120101	0.0300254	0.0300254	0	0.0300254	0	0
TCGA-AD-A5EK	0.0974612	0.048788	0.0487306	0.0365623	0.00608415	0.00608415	0	0	0	5.73976e-05	5.73976e-05	0.0486732	0.0486732	0	0.0486732	0	0
TCGA-AM-5820	7.81247	7.81247	7.79776	0.334968	0.0769676	0.0963227	5.20738	1.12214	0.959984	0.0147048	0.0147048	0	0	0	0	0	0
TCGA-AM-5821	12.3393	12.2835	12.2536	10.5395	0.580466	0.59598	0.0343864	0.0856989	0.417597	0.0298788	0.0298788	0.0558055	0.0375955	0.0051172	0.0324783	0.01821	0.01821
TCGA-AU-3779	0	0	0	0	0	0	0	0	0	0	0	0	0	0	0	0	0
TCGA-AU-6004	15.485	15.4126	15.357	12.1635	1.75331	0.77484	0.0631856	0.117407	0.484708	0.0556646	0.0556646	0.0723233	0.06445	0.01613	0.04832	0.00787333	0.00787333
TCGA-AY-4070	7.79065	7.77857	7.75207	6.08599	0.645628	0.436038	0.0663188	0.100668	0.417431	0.0265006	0.0265006	0.0120826	0.00825632	0.000514187	0.00774213	0.00382625	0.00382625
TCGA-AY-4071	0.848269	0.830015	0.826994	0.629041	0.0852199	0.0498161	0.00812286	0.0101136	0.0446815	0.00302078	0.00302078	0.0182537	0.00379164	0.00124146	0.00255017	0.014462	0.014462
TCGA-AY-5543	0.150804	0.150804	0.150644	0.075322	0.0677898	0.0075322	0	0	0	0.000160242	0.000160242	0	0	0	0	0	0
TCGA-AY-6196	0.00153453	0.00153453	0	0	0	0	0	0	0	0.00153453	0.00153453	0	0	0	0	0	0
TCGA-AY-6197	8.00632	7.77227	7.74635	6.29791	0.826493	0.286099	0.0383365	0.0537066	0.243807	0.0259174	0.0259174	0.234053	0.229564	0.0014438	0.228121	0.00448834	0.00448834
TCGA-AY-6386	5.92532	5.92532	5.92044	4.93838	0.396967	0.321893	0.0317086	0.0579715	0.173518	0.0048805	0.0048805	0	0	0	0	0	0
TCGA-AY-A54L	0.0633229	0.000684302	0.000394228	0.000136171	0	7.69516e-05	0	0	0.000181105	0.000290074	0.000290074	0.0626386	0.0626386	0	0.0626386	0	0
TCGA-AY-A69D	16.0157	15.9761	15.9454	5.19708	0.409584	0.403807	0.772617	5.17407	3.98825	0.0306951	0.0306951	0.0395703	0.0138247	0.00257107	0.0112536	0.0257456	0.0257456
TCGA-AY-A71X	0.0220602	0.0219787	0.0214706	2.32807e-05	2.91008e-05	0	0	0	0.0214182	0.000508115	0.000508115	8.14823e-05	8.14823e-05	0	8.14823e-05	0	0
TCGA-AY-A8YK	0.128497	0.128497	0.128497	0.128497	0	0	0	0	0	0	0	0	0	0	0	0	0
TCGA-AZ-4308	0.360017	0.312278	0.309831	0.222656	0.0324587	0.019272	0.00466206	0.00686296	0.0239199	0.00244624	0.00244624	0.0477388	0.0461141	0.00187805	0.044236	0.00162472	0.00162472
TCGA-AZ-4313	1.03563	0.851814	0.847602	0.619221	0.0780739	0.0567879	0.00742484	0.0134664	0.0726283	0.00421185	0.00421185	0.183817	0.17571	0.0714068	0.104303	0.00810673	0.00810673
TCGA-AZ-4315	0.111034	0.0838033	0.0830875	0.0543211	0.0110631	0.0062361	0.000428658	0.000878691	0.0101598	0.000715832	0.000715832	0.0272303	0.0242842	0.00727524	0.017009	0.00294613	0.00294613
TCGA-AZ-4323	20.9341	20.9005	20.8508	13.9439	1.03736	0.676701	0.336894	2.39533	2.46065	0.0497308	0.0497308	0.0335447	0.0209738	0.00611137	0.0148624	0.0125709	0.0125709
TCGA-AZ-4614	0.0705732	0.0297291	0.0277041	0.0148986	0.00436152	0.00236058	0.00052007	0.000814552	0.00474873	0.00202503	0.00202503	0.0408441	0.0191871	0.00799041	0.0111967	0.021657	0.021657
TCGA-AZ-4615	0.0729863	0.022844	0.022679	0.00992569	0.00152943	0.000541433	0	0.000223845	0.0104586	0.000165057	0.000165057	0.0501423	0.031635	0.00976698	0.021868	0.0185073	0.0185073
TCGA-AZ-4616	8.33677	8.31628	8.29155	6.88246	0.45169	0.488582	0.0245332	0.0817337	0.362548	0.0247344	0.0247344	0.0204905	0.0117488	0.00226365	0.0094852	0.00874163	0.00874163
TCGA-AZ-4682	0.031954	0.031954	0.031954	0.0191724	0.00639081	0.00639081	0	0	0	0	0	0	0	0	0	0	0
TCGA-AZ-4684	0.00484742	0.00322736	0.0028727	0.00166393	0.000473155	0.000321385	1.86915e-05	3.27763e-05	0.00036276	0.000354668	0.000354668	0.00162005	0.00133628	0.000272341	0.00106394	0.000283773	0.000283773
TCGA-AZ-5403	0.000156285	0.000156285	0	0	0	0	0	0	0	0.000156285	0.000156285	0	0	0	0	0	0
TCGA-AZ-5407	0	0	0	0	0	0	0	0	0	0	0	0	0	0	0	0	0
TCGA-AZ-6598	0.0646788	0.0430236	0.0429203	0.0214602	0	0	0	0	0.0214602	0.000103291	0.000103291	0.0216551	0.0215577	4.99074e-05	0.0215077	9.74909e-05	9.74909e-05
TCGA-AZ-6599	7.33269e-05	0	0	0	0	0	0	0	0	0	0	7.33269e-05	0	0	0	7.33269e-05	7.33269e-05
TCGA-AZ-6600	0.0744646	0.0372802	0.0371844	0	0.0371844	0	0	0	0	9.58361e-05	9.58361e-05	0.0371844	0.0371844	0	0.0371844	0	0
TCGA-AZ-6601	0.0666362	0.0444241	0.0444241	0.0444241	0	0	0	0	0	0	0	0.0222121	0.0222121	0.00740402	0.014808	0	0
TCGA-AZ-6603	0	0	0	0	0	0	0	0	0	0	0	0	0	0	0	0	0
TCGA-AZ-6605	0.0517675	0.0505011	0.0500239	0.0166746	0.0166746	0.0166746	0	0	0	0.000477151	0.000477151	0.00126643	0	0	0	0.00126643	0.00126643
TCGA-AZ-6606	4.33136	4.33136	4.32035	3.76433	0.176835	0.150433	0.00707208	0.0271055	0.194569	0.0110176	0.0110176	0	0	0	0	0	0
TCGA-AZ-6607	0	0	0	0	0	0	0	0	0	0	0	0	0	0	0	0	0
TCGA-AZ-6608	0.00167226	0.000841857	0.000604598	0.000248711	0.000118629	0.000118629	0	0	0.000118629	0.000237258	0.000237258	0.000830403	0.000711774	0.000237258	0.000474516	0.000118629	0.000118629
TCGA-CA-5254	0.000410778	0.000410778	0.000204897	0.000101957	0	0.00010294	0	0	0	0.00020588	0.00020588	0	0	0	0	0	0
TCGA-CA-5255	0.162881	0.162733	0.162461	0.000421315	0	3.45348e-05	0	0	0.162005	0.000272271	0.000272271	0.00014738	7.83101e-05	3.45348e-05	4.37752e-05	6.90697e-05	6.90697e-05
TCGA-CA-5256	0.0586592	0.0340792	0.0331905	0.0190586	0.00141566	0.00120732	0.000246989	0.000504716	0.0107572	0.000888739	0.000888739	0.0245799	0.0135125	0.00592628	0.00758617	0.0110675	0.0110675
TCGA-CA-5796	0.100371	0.100261	0.100261	0	0.100261	0	0	0	0	0	0	0.000110663	0.000110663	0	0.000110663	0	0
TCGA-CA-5797	0	0	0	0	0	0	0	0	0	0	0	0	0	0	0	0	0
TCGA-CA-6715	0.103248	0.103248	0.103248	0.0774359	0.012906	0.012906	0	0	0	0	0	0	0	0	0	0	0
TCGA-CA-6716	0	0	0	0	0	0	0	0	0	0	0	0	0	0	0	0	0
TCGA-CA-6717	0	0	0	0	0	0	0	0	0	0	0	0	0	0	0	0	0
TCGA-CA-6718	0.000855124	0	0	0	0	0	0	0	0	0	0	0.000855124	0.000855124	0.000855124	0	0	0
TCGA-CA-6719	0	0	0	0	0	0	0	0	0	0	0	0	0	0	0	0	0
TCGA-CK-4947	0.120556	0.109596	0.109596	0.109596	0	0	0	0	0	0	0	0.0109596	0.00576824	0.00115365	0.00461459	0.00519141	0.00519141
TCGA-CK-4948	0.0961015	0.0961015	0.0961015	0.0961015	0	0	0	0	0	0	0	0	0	0	0	0	0
TCGA-CK-4950	1.6992	1.68984	1.66967	0.0748933	0.0115226	0.0194228	0.00236541	0.0056701	1.5558	0.0201689	0.0201689	0.00936224	0.00897456	0.00414126	0.0048333	0.000387683	0.000387683
TCGA-CK-4951	0.134993	0.0348314	0.0340849	0.00835384	0.0092937	0.0027856	0	0.0016105	0.0120413	0.000746439	0.000746439	0.100161	0.0879822	0.0138484	0.0741338	0.0121793	0.0121793
TCGA-CK-4952	20.0882	20.0682	19.9959	16.59	1.45632	0.790612	0.10254	0.207914	0.848423	0.0723626	0.0723626	0.0199359	0.000393116	0.000100018	0.000293098	0.0195428	0.0195428
TCGA-CK-5912	0.00908667	0.00908667	0	0	0	0	0	0	0	0.00908667	0.00908667	0	0	0	0	0	0
TCGA-CK-5913	0.000192897	0.000192897	0.000117911	0.000117911	0	0	0	0	0	7.49859e-05	7.49859e-05	0	0	0	0	0	0
TCGA-CK-5914	0.0736228	0.0728327	0.0714762	0.0341405	0.0108163	0.0108163	0.000544899	0.000582257	0.0145761	0.00135641	0.00135641	0.000790104	0.000790104	0	0.000790104	0	0
TCGA-CK-5915	0.176134	0.176134	0.176134	0	0	0.176134	0	0	0	0	0	0	0	0	0	0	0
TCGA-CK-5916	0	0	0	0	0	0	0	0	0	0	0	0	0	0	0	0	0
TCGA-CK-6746	0.149017	0.149017	0.149017	0	0	0	0	0	0.149017	0	0	0	0	0	0	0	0
TCGA-CK-6747	0.917888	0.159633	0.159633	0.0598622	0.0199541	0	0	0.0266054	0.0532109	0	0	0.758255	0.663992	0.0674105	0.596582	0.0942627	0.0942627
TCGA-CK-6748	0.0846266	0.0846266	0.0846266	0.06347	0.00352611	0.00352611	0.00352611	0.00352611	0.00705222	0	0	0	0	0	0	0	0
TCGA-CK-6751	0.174811	0.174772	0.174506	0.174394	0.000112645	0	0	0	0	0.000265355	0.000265355	3.94869e-05	3.94869e-05	1.97434e-05	1.97434e-05	0	0
TCGA-CM-4743	0.0469762	0.0169036	0.0149188	0.0146842	4.69144e-05	4.69144e-05	0	0	0.000140743	0.00198484	0.00198484	0.0300726	0.000594563	0.00013037	0.000464193	0.029478	0.029478
TCGA-CM-4744	0.0938611	0.0608411	0.0600707	0.0327537	0.0187454	0.00436926	9.08483e-06	0.000489799	0.00370347	0.000770328	0.000770328	0.03302	0.0308398	0.00387614	0.0269636	0.00218023	0.00218023
TCGA-CM-4746	0.632296	0.561785	0.549689	0.367141	0.0758591	0.0404967	0.00539801	0.0112688	0.0495246	0.0120961	0.0120961	0.0705115	0.0611456	0.0150721	0.0460735	0.00936591	0.00936591
TCGA-CM-4747	0.0845507	0.0802599	0.0786665	0.028901	0.00662291	0.0046708	0.00057145	0.00116321	0.0367371	0.00159341	0.00159341	0.00429084	0.00355386	0.000244685	0.00330918	0.00073698	0.00073698
TCGA-CM-4750	4.17533	4.12558	4.09322	2.95386	0.476203	0.312111	0.0296706	0.0531663	0.268217	0.0323525	0.0323525	0.0497573	0.0422957	0.0085741	0.0337216	0.00746159	0.00746159
TCGA-CM-4751	0	0	0	0	0	0	0	0	0	0	0	0	0	0	0	0	0
TCGA-CM-4752	0.159741	0.0977579	0.0931852	0.0651694	0.00918986	0.00614463	0.000788816	0.00150661	0.0103859	0.00457271	0.00457271	0.0619826	0.0535242	0.0271219	0.0264023	0.00845842	0.00845842
TCGA-CM-5341	0.0391963	0.0288127	0.0264678	0.0168255	0.003009	0.00191017	3.24864e-05	0.000396123	0.00429456	0.00234491	0.00234491	0.0103835	0.00671534	0.00166974	0.00504559	0.0036682	0.0036682
TCGA-CM-5344	0.0214036	0.00051783	0.000149203	4.90857e-05	0	7.56329e-05	0	0	2.44847e-05	0.000368627	0.000368627	0.0208857	9.19145e-05	6.91017e-05	2.28128e-05	0.0207938	0.0207938
TCGA-CM-5348	0	0	0	0	0	0	0	0	0	0	0	0	0	0	0	0	0
TCGA-CM-5349	0.000230872	0.000167839	0	0	0	0	0	0	0	0.000167839	0.000167839	6.3033e-05	6.3033e-05	0	6.3033e-05	0	0
TCGA-CM-5860	0.200979	0.200979	0.200858	0.200858	0	0	0	0	0	0.000120708	0.000120708	0	0	0	0	0	0
TCGA-CM-5861	2.32708	2.19283	2.1849	1.82917	0.126763	0.0841418	0.0061988	0.0397628	0.0988678	0.00792241	0.00792241	0.134256	0.134256	0	0.134256	0	0
TCGA-CM-5862	0.0635796	5.03003e-05	5.03003e-05	5.03003e-05	0	0	0	0	0	0	0	0.0635293	0.0635293	0	0.0635293	0	0
TCGA-CM-5863	0.569832	0.482166	0.482166	0.0438332	0.00730554	0.00730554	0	0	0.423721	0	0	0.0876665	0.0876665	0	0.0876665	0	0
TCGA-CM-5864	0.114072	0.0570362	0.0570362	0.0427771	0.014259	0	0	0	0	0	0	0.0570362	0.0570362	0.0190121	0.0380241	0	0
TCGA-CM-5868	0.717523	0.633109	0.633109	0.475736	0.128431	0.0168829	0	0	0.0120592	0	0	0.0844145	0.0844145	0.0844145	0	0	0
TCGA-CM-6161	0	0	0	0	0	0	0	0	0	0	0	0	0	0	0	0	0
TCGA-CM-6162	0	0	0	0	0	0	0	0	0	0	0	0	0	0	0	0	0
TCGA-CM-6163	0	0	0	0	0	0	0	0	0	0	0	0	0	0	0	0	0
TCGA-CM-6164	0.107878	0.107118	0.106615	0.0852657	0.0124521	0.00737613	0	7.13392e-05	0.00144944	0.000503668	0.000503668	0.000759828	0.000635354	9.88104e-05	0.000536543	0.000124475	0.000124475
TCGA-CM-6165	0	0	0	0	0	0	0	0	0	0	0	0	0	0	0	0	0
TCGA-CM-6166	0.108807	0.107431	0.106826	0.000687722	0.000229241	0.000229241	0	0	0.10568	0.000605349	0.000605349	0.00137544	0.0011462	0.000458481	0.000687722	0.000229241	0.000229241
TCGA-CM-6167	0.0855999	0.0855999	0.0855999	0	0.0855999	0	0	0	0	0	0	0	0	0	0	0	0
TCGA-CM-6168	0.184914	0.0934957	0.091418	0.0734609	0.0179571	0	0	0	0	0.00207768	0.00207768	0.091418	0.091418	0	0.091418	0	0
TCGA-CM-6169	0.000276001	0	0	0	0	0	0	0	0	0	0	0.000276001	0.000276001	0	0.000276001	0	0
TCGA-CM-6170	0.239014	0.239014	0.239014	0	0.0239014	0.0239014	0	0	0.191211	0	0	0	0	0	0	0	0
TCGA-CM-6171	2.60517	2.60517	2.60517	2.17093	0.17641	0.207734	0	0.0100199	0.0400796	0	0	0	0	0	0	0	0
TCGA-CM-6172	0.0636911	0.0014876	0.000146813	7.34063e-05	0	0	0	0	7.34063e-05	0.00134079	0.00134079	0.0622035	0.0621017	0	0.0621017	0.000101806	0.000101806
TCGA-CM-6674	0.708258	0.708258	0.708258	0.450039	0.15862	0.0553327	0	0	0.0442661	0	0	0	0	0	0	0	0
TCGA-CM-6675	0	0	0	0	0	0	0	0	0	0	0	0	0	0	0	0	0
TCGA-CM-6676	0	0	0	0	0	0	0	0	0	0	0	0	0	0	0	0	0
TCGA-CM-6677	8.56426	8.55677	8.54224	6.96232	0.606788	0.362551	0.0290324	0.0688415	0.512701	0.0145349	0.0145349	0.00748561	0.00743267	0.00210849	0.00532418	5.29425e-05	5.29425e-05
TCGA-CM-6678	0.116915	0.0584574	0.0584574	0	0	0.0584574	0	0	0	0	0	0.0584574	0.0584574	0	0.0584574	0	0
TCGA-CM-6679	0.082671	0.0764979	0.0747079	0.0693334	0.000914146	0.000914146	0	0.000876632	0.00266965	0.00178995	0.00178995	0.00617311	0.00529648	0.00175326	0.00354322	0.000876632	0.000876632
TCGA-CM-6680	1.03259	1.00268	1.00006	0.81316	0.081194	0.0519539	0.00271905	0.0128756	0.0381593	0.00262251	0.00262251	0.0299096	0.0299096	0	0.0299096	0	0
TCGA-D5-5537	0.0778662	0.0778662	0.0778662	0.0195129	0.00324185	0.00324185	0	0	0.0518696	0	0	0	0	0	0	0	0
TCGA-D5-5538	0.0707016	0.00302885	0.00267252	0.00106901	0.000178168	0.000178168	0.000178168	0.000178168	0.000890839	0.000356335	0.000356335	0.0676728	0.0648531	0	0.0648531	0.0028197	0.0028197
TCGA-D5-5539	0.348441	0.347824	0.345818	0.247529	0.0288514	0.0109823	0.00374266	0.00374266	0.0509696	0.00200566	0.00200566	0.000617752	0.000525722	0.000184059	0.000341663	9.20296e-05	9.20296e-05
TCGA-D5-5540	0.110955	0.110955	0.110955	0.0986267	0.0123283	0	0	0	0	0	0	0	0	0	0	0	0
TCGA-D5-5541	0	0	0	0	0	0	0	0	0	0	0	0	0	0	0	0	0
TCGA-D5-6529	0.0345277	0.0344801	0.0344801	0.0229867	0.00574668	0.00574668	0	0	0	0	0	4.76245e-05	4.76245e-05	0	4.76245e-05	0	0
TCGA-D5-6530	0.00163933	0.000874309	0.000655732	0.000218577	0.000109289	0.000109289	0	0.000109289	0.000109289	0.000218577	0.000218577	0.000765021	0.000655732	0.000218577	0.000437155	0.000109289	0.000109289
TCGA-D5-6531	0.38031	0.37849	0.376709	0.258219	0.0554624	0.0508337	0.00173578	0.00177938	0.00867892	0.00178146	0.00178146	0.0018199	0.00177784	0	0.00177784	4.20564e-05	4.20564e-05
TCGA-D5-6532	0.103532	0.103532	0.102114	0.0510568	0	0	0	0	0.0510568	0.00141858	0.00141858	0	0	0	0	0	0
TCGA-D5-6533	0.12308	0.12308	0.12308	0.0547023	0	0	0	0	0.0683778	0	0	0	0	0	0	0	0
TCGA-D5-6534	0.0319275	0.0315806	0.0296914	0.0296914	0	0	0	0	0	0.0018892	0.0018892	0.000346862	0.000346862	0.000138745	0.000208117	0	0
TCGA-D5-6535	0	0	0	0	0	0	0	0	0	0	0	0	0	0	0	0	0
TCGA-D5-6536	14.8468	14.8255	14.7951	12.6402	0.693212	0.693317	0.0545977	0.177053	0.536679	0.030362	0.030362	0.0213025	0.00587259	0.00144957	0.00442302	0.0154299	0.0154299
TCGA-D5-6537	0.768776	0.685638	0.685393	0.595964	0.0674399	0.00876119	0.00191534	0.00191534	0.00939714	0.000245389	0.000245389	0.0831378	0.0827787	0.027563	0.0552157	0.000359127	0.000359127
TCGA-D5-6538	0.742339	0.742339	0.742339	0.0799168	0.0133195	0.0133195	0.342162	0.10774	0.185881	0	0	0	0	0	0	0	0
TCGA-D5-6539	0	0	0	0	0	0	0	0	0	0	0	0	0	0	0	0	0
TCGA-D5-6540	0.0762955	0.062344	0.0608261	0.0283609	0.0139094	0.00500281	5.4575e-06	0.000425356	0.0131222	0.00151789	0.00151789	0.0139515	0.00708548	6.75949e-05	0.00701788	0.00686598	0.00686598
TCGA-D5-6541	0.595576	0.504611	0.498095	0.351879	0.0752699	0.0111294	0.0374885	0.00441041	0.0179173	0.00651641	0.00651641	0.0909647	0.0785604	0.00413476	0.0744257	0.0124043	0.0124043
TCGA-D5-6898	0	0	0	0	0	0	0	0	0	0	0	0	0	0	0	0	0
TCGA-D5-6920	1.07655	1.07655	1.07655	0.803703	0.0968279	0.0597054	0.00247483	0.014849	0.0989934	0	0	0	0	0	0	0	0
TCGA-D5-6922	0	0	0	0	0	0	0	0	0	0	0	0	0	0	0	0	0
TCGA-D5-6923	0.161799	0.161673	0.107782	0	0	0	0	0	0.107782	0.0538909	0.0538909	0.000126208	0.000126208	0	0.000126208	0	0
TCGA-D5-6924	0.0789074	0.0789074	0.0789074	0.0789074	0	0	0	0	0	0	0	0	0	0	0	0	0
TCGA-D5-6926	0	0	0	0	0	0	0	0	0	0	0	0	0	0	0	0	0
TCGA-D5-6927	2.00282	1.99465	1.99301	1.27721	0.0757964	0.0963493	0.0767307	0.00643055	0.460493	0.00163489	0.00163489	0.00817443	0	0	0	0.00817443	0.00817443
TCGA-D5-6928	0.814854	0.814854	0.808175	0.0853975	0.0949391	0.0594443	0.00333957	0.00333957	0.561715	0.00667913	0.00667913	0	0	0	0	0	0
TCGA-D5-6929	0.0645832	0.0645832	0.0645832	0	0.0645832	0	0	0	0	0	0	0	0	0	0	0	0
TCGA-D5-6930	0.219836	0.219723	0.219723	0.068566	0.00428537	0.00545411	0.0514245	0	0.0899928	0	0	0.000112965	2.80701e-05	0	2.80701e-05	8.48945e-05	8.48945e-05
TCGA-D5-6931	0	0	0	0	0	0	0	0	0	0	0	0	0	0	0	0	0
TCGA-D5-6932	0.325878	0.0932576	0.0932576	0	0.000104784	0.000104784	0	0	0.0930481	0	0	0.23262	0.139572	0.015508	0.124064	0.0930481	0.0930481
TCGA-D5-7000	6.1504	6.1504	6.1504	5.43557	0.230381	0.259682	0.0306995	0.0306995	0.163371	0	0	0	0	0	0	0	0
TCGA-DM-A0X9	0.358383	0	0	0	0	0	0	0	0	0	0	0.358383	0.358383	0	0.358383	0	0
TCGA-DM-A0XD	0.0156468	0.000617227	0.000116293	6.72673e-05	1.55327e-05	3.34925e-05	0	0	0	0.000500934	0.000500934	0.0150296	0.0149679	0.000455553	0.0145123	6.17297e-05	6.17297e-05
TCGA-DM-A0XF	0.76493	0.567607	0.554837	0.363498	0.154782	0.0186859	0	0.0104641	0.00740705	0.0127695	0.0127695	0.197323	0.1938	0.00704726	0.186752	0.00352363	0.00352363
TCGA-DM-A1D0	11.6377	11.6206	11.5751	9.67161	0.717466	0.618784	0.0519635	0.128357	0.38692	0.0455009	0.0455009	0.0171362	0.0115472	0.00118494	0.0103623	0.00558901	0.00558901
TCGA-DM-A1D4	0.185851	0.0929001	0.0929001	0.0773748	0.00773748	0.00778783	0	0	0	0	0	0.0929505	0.0929001	0.0464249	0.0464752	5.03524e-05	5.03524e-05
TCGA-DM-A1D6	0	0	0	0	0	0	0	0	0	0	0	0	0	0	0	0	0
TCGA-DM-A1D7	0.401305	0.401305	0.392766	0.313074	0.0199229	0.0256152	0	0.00853839	0.0256152	0.00853839	0.00853839	0	0	0	0	0	0
TCGA-DM-A1D8	0.0384843	0.000813553	4.14927e-05	0	4.14927e-05	0	0	0	0	0.00077206	0.00077206	0.0376707	0.0375893	0	0.0375893	8.14512e-05	8.14512e-05
TCGA-DM-A1D9	0.487539	0	0	0	0	0	0	0	0	0	0	0.487539	0.487539	0	0.487539	0	0
TCGA-DM-A1DA	0.295925	0	0	0	0	0	0	0	0	0	0	0.295925	0.295925	0	0.295925	0	0
TCGA-DM-A1DB	0.137972	0	0	0	0	0	0	0	0	0	0	0.137972	0.137972	0	0.137972	0	0
TCGA-DM-A1HA	0.115282	0.115282	0.115282	0	0.115282	0	0	0	0	0	0	0	0	0	0	0	0
TCGA-DM-A1HB	0.652946	0.351744	0.351744	0.260205	0.0598221	0.0271919	0	0.00452486	0	0	0	0.301202	0.301202	0.0529893	0.248213	0	0
TCGA-DM-A280	10.9604	6.68212	6.63733	5.46114	0.471512	0.368389	0.0246794	0.0852195	0.226393	0.0447887	0.0447887	4.27827	4.10392	1.42969	2.67423	0.174353	0.174353
TCGA-DM-A282	0.71361	0.529801	0.529801	0.354256	0.128061	0.0258594	0	0	0.0216246	0	0	0.183809	0.172996	0.0504573	0.122539	0.0108123	0.0108123
TCGA-DM-A285	0.259981	0.148648	0.148275	0.110953	0.00627358	0.00627358	0	0.0123872	0.0123872	0.000372897	0.000372897	0.111333	0.111257	0.0395479	0.0717091	7.59952e-05	7.59952e-05
TCGA-DM-A288	0.805558	0.595302	0.595302	0.540066	0.0216777	0.0160498	0	0	0.0175089	0	0	0.210256	0.210256	0	0.210256	0	0
TCGA-DM-A28A	0	0	0	0	0	0	0	0	0	0	0	0	0	0	0	0	0
TCGA-DM-A28C	9.36187e-05	0	0	0	0	0	0	0	0	0	0	9.36187e-05	9.36187e-05	9.36187e-05	0	0	0
TCGA-DM-A28E	0.106308	0.0709228	0.0708217	0.0265897	0.0088464	0.0088464	0	0	0.0265392	0.000101102	0.000101102	0.0353856	0.0353856	0	0.0353856	0	0
TCGA-DM-A28F	0.426685	0.320014	0.320014	0.284457	0.0177785	0.0177785	0	0	0	0	0	0.106671	0.106671	0.0711142	0.0355571	0	0
TCGA-DM-A28G	0.309749	0.182229	0.182102	0.115911	0.0588656	0.00732621	0	0	0	0.000126976	0.000126976	0.127519	0.109274	0.0376254	0.0716489	0.0182451	0.0182451
TCGA-DM-A28H	30.1056	11.9779	11.9167	9.7507	0.640852	0.689189	0.0655827	0.161398	0.608967	0.0612647	0.0612647	18.1277	17.5306	5.14593	12.3847	0.597027	0.597027
TCGA-DM-A28K	11.8611	11.799	11.7203	0.721147	0.141442	0.204635	6.96141	1.97258	1.71907	0.0786734	0.0786734	0.0621401	0.051849	0.0011154	0.0507336	0.0102912	0.0102912
TCGA-DM-A28M	0.25188	0.218319	0.218206	0.128233	0.052529	0.0122359	0	0	0.0252088	0.000112525	0.000112525	0.0335614	0.0335614	0.0209759	0.0125855	0	0
TCGA-F4-6459	0.256627	0.256395	0.249	0.0545554	0.156033	0.0227839	0	0.00181386	0.0138133	0.00739498	0.00739498	0.000232547	0.000232547	0	0.000232547	0	0
TCGA-F4-6460	0	0	0	0	0	0	0	0	0	0	0	0	0	0	0	0	0
TCGA-F4-6461	0.0761756	0.0761756	0.0761756	0.00846396	0.0592477	0	0	0	0.00846396	0	0	0	0	0	0	0	0
TCGA-F4-6463	7.96313	7.51809	7.51391	5.3168	0.67789	0.204638	0.101249	0.475106	0.738224	0.00418419	0.00418419	0.445035	0.44499	0.0281473	0.416843	4.54968e-05	4.54968e-05
TCGA-F4-6569	0.143181	0.143181	0.143181	0.0715905	0.0715905	0	0	0	0	0	0	0	0	0	0	0	0
TCGA-F4-6570	0.0907735	0.090694	0.090694	0.0291516	0.00971721	0.00518251	0	0	0.0466426	0	0	7.95561e-05	7.95561e-05	3.97781e-05	3.97781e-05	0	0
TCGA-F4-6703	0	0	0	0	0	0	0	0	0	0	0	0	0	0	0	0	0
TCGA-F4-6704	0.018392	0.000726469	0.000602907	0	0	9.77427e-05	6.17808e-05	6.17808e-05	0.000381603	0.000123562	0.000123562	0.0176655	0.0175568	0.000159524	0.0173972	0.00010875	0.00010875
TCGA-F4-6805	0.00012726	0	0	0	0	0	0	0	0	0	0	0.00012726	0	0	0	0.00012726	0.00012726
TCGA-F4-6806	0.840616	0.718583	0.717611	0.700525	0.017086	0	0	0	0	0.000972372	0.000972372	0.122033	0.121547	0.120574	0.000972372	0.000486186	0.000486186
TCGA-F4-6807	0	0	0	0	0	0	0	0	0	0	0	0	0	0	0	0	0
TCGA-F4-6808	0.612937	0.612937	0.612937	0.1068	0.0533998	0.00696519	0	0	0.445772	0	0	0	0	0	0	0	0
TCGA-F4-6809	0.230503	0.230503	0.228959	0.00166153	0.000332306	0.000332306	0.000332306	0.186424	0.0398767	0.00154436	0.00154436	0	0	0	0	0	0
TCGA-F4-6854	19.8963	19.8096	19.7107	0.746961	0.190498	0.333533	12.549	3.32294	2.56779	0.0989313	0.0989313	0.0866885	0.044792	0.0148346	0.0299574	0.0418965	0.0418965
TCGA-F4-6855	0.164252	0.082126	0.082126	0.0703937	0.0117323	0	0	0	0	0	0	0.082126	0.082126	0	0.082126	0	0
TCGA-F4-6856	1.78546	1.71003	1.70371	1.22657	0.286653	0.0991714	0.00502824	0.00632864	0.0799533	0.00632864	0.00632864	0.0754235	0.0754235	0.0301694	0.0452541	0	0
TCGA-G4-6293	1.47439	1.47433	1.47433	1.17355	0.128711	0.0733036	0.0264994	0.0264994	0.0457717	0	0	6.28445e-05	6.28445e-05	0	6.28445e-05	0	0
TCGA-G4-6294	6.89806	5.31576	5.30013	4.28409	0.394206	0.356773	0.0234415	0.0472485	0.194368	0.0156315	0.0156315	1.58229	1.51646	0.185923	1.33054	0.0658328	0.0658328
TCGA-G4-6295	0.0592089	0.0592089	0.0592089	0.0591306	7.82151e-05	0	0	0	0	0	0	0	0	0	0	0	0
TCGA-G4-6297	18.4935	18.4366	18.3378	1.52544	0.317566	0.272888	1.16419	8.75298	6.30478	0.0987509	0.0987509	0.0569048	0.026125	0.00659992	0.0195251	0.0307798	0.0307798
TCGA-G4-6298	10.1268	10.1065	10.0799	8.23894	0.774217	0.554184	0.0851084	0.105564	0.321935	0.0265429	0.0265429	0.0203324	0.0198414	0.000938544	0.0189028	0.000491072	0.000491072
TCGA-G4-6299	0.0875333	0.0875333	0.0875333	0.0875333	0	0	0	0	0	0	0	0	0	0	0	0	0
TCGA-G4-6302	1.67667	1.64168	1.63584	1.2277	0.247556	0.0748488	0.00954308	0.0174578	0.0587354	0.00583189	0.00583189	0.0349913	0.0349913	0	0.0349913	0	0
TCGA-G4-6303	0.0528015	0.0264796	0.0263566	0.0262653	5.66062e-05	0	0	0	3.47424e-05	0.000122918	0.000122918	0.0263219	0.0263219	0.0262653	5.66062e-05	0	0
TCGA-G4-6304	0.374984	0.284947	0.284403	0.230913	0.0262805	0.0263328	0	0.00021937	0.000658109	0.000543402	0.000543402	0.0900374	0.0665649	0.0655915	0.000973362	0.0234725	0.0234725
TCGA-G4-6306	0.140401	0.0200573	0.0200573	0.015043	0.00250716	0.00250716	0	0	0	0	0	0.120344	0.120344	0	0.120344	0	0
TCGA-G4-6307	0.112948	0.075323	0.0752498	0.0300999	0.0451499	0	0	0	0	7.32002e-05	7.32002e-05	0.0376249	0.0376249	0	0.0376249	0	0
TCGA-G4-6309	0.38083	0.38083	0.38083	0.349095	0.0158679	0.0158679	0	0	0	0	0	0	0	0	0	0	0
TCGA-G4-6310	0.35159	0.234291	0.234038	0.187027	0.0318132	0.0150885	0	0	0.000109541	0.00025278	0.00025278	0.1173	0.117229	0.0168281	0.100401	7.10048e-05	7.10048e-05
TCGA-G4-6311	0.0604317	0.0547793	0.0547793	0	0.0547793	0	0	0	0	0	0	0.00565246	0.000180529	0.000119998	6.05302e-05	0.00547193	0.00547193
TCGA-G4-6314	0.103919	0.0700941	0.0700941	0.0332602	0.00520377	0.00520377	0	0.00520377	0.0212226	0	0	0.0338245	0.0338245	0	0.0338245	0	0
TCGA-G4-6315	10.3537	10.3327	10.3053	8.15955	1.16884	0.515947	0.0314441	0.120405	0.309129	0.0274192	0.0274192	0.0209266	0.0179439	0.00601338	0.0119306	0.00298264	0.00298264
TCGA-G4-6317	0.0437031	0.0437031	0.0437031	0.0437031	0	0	0	0	0	0	0	0	0	0	0	0	0
TCGA-G4-6320	6.67172	5.86769	5.80541	4.62798	0.472095	0.34934	0.010073	0.0894182	0.256506	0.0622761	0.0622761	0.804033	0.764327	0.174042	0.590286	0.0397053	0.0397053
TCGA-G4-6321	0.200406	0.138743	0.138743	0.0887914	0.00965994	0.00525541	0.0322332	0.00140144	0.00140144	0	0	0.0616635	0.0616635	0.0308317	0.0308317	0	0
TCGA-G4-6322	7.88203	7.84899	7.82355	0.665012	0.127632	0.109864	4.71357	1.24779	0.959689	0.0254308	0.0254308	0.0330424	0.0195101	0.00260223	0.0169079	0.0135323	0.0135323
TCGA-G4-6323	0.330649	0.210354	0.204935	0.141205	0.0203095	0.00576836	0	0	0.0376522	0.0054194	0.0054194	0.120294	0.120294	0.0171849	0.10311	0	0
TCGA-G4-6586	32.8336	21.2573	21.1507	17.8704	1.09221	1.10431	0.0753093	0.231726	0.776751	0.106594	0.106594	11.5763	11.3861	6.02297	5.36316	0.190192	0.190192
TCGA-G4-6588	25.7327	20.4477	20.3909	15.9665	2.30692	1.04203	0.120779	0.200513	0.754167	0.0568084	0.0568084	5.28497	5.15744	0.394625	4.76281	0.12753	0.12753
TCGA-G4-6625	0.152278	0.101464	0.101464	0.043461	0.057948	5.4994e-05	0	0	0	0	0	0.0508145	0.0507595	0	0.0507595	5.4994e-05	5.4994e-05
TCGA-G4-6626	5.60074	5.57403	5.55973	4.61274	0.398272	0.273954	0.0209381	0.0562512	0.197577	0.0142933	0.0142933	0.0267159	0.0246656	0.000972916	0.0236927	0.00205027	0.00205027
TCGA-G4-6627	0.26037	0.189375	0.189375	0.170389	0.0189321	0	0	5.40299e-05	0	0	0	0.0709952	0.0709952	0	0.0709952	0	0
TCGA-G4-6628	8.81235e-05	8.81235e-05	0	0	0	0	0	0	0	8.81235e-05	8.81235e-05	0	0	0	0	0	0
TCGA-NH-A50T	0.00124584	0	0	0	0	0	0	0	0	0	0	0.00124584	0.0010382	0.00041528	0.00062292	0.00020764	0.00020764
TCGA-NH-A50U	0.766727	0.766727	0.766727	0.64077	0.0262499	0.0262499	0.00598456	0.0292187	0.0382542	0	0	0	0	0	0	0	0
TCGA-NH-A50V	3.22683	3.16269	3.15238	2.38827	0.376803	0.248107	0.0125697	0.0216407	0.104996	0.010302	0.010302	0.0641446	0.0641446	0.00534538	0.0587992	0	0
TCGA-NH-A5IV	0	0	0	0	0	0	0	0	0	0	0	0	0	0	0	0	0
TCGA-NH-A6GA	0	0	0	0	0	0	0	0	0	0	0	0	0	0	0	0	0
TCGA-NH-A6GB	0	0	0	0	0	0	0	0	0	0	0	0	0	0	0	0	0
TCGA-NH-A6GC	0.13228	0.13228	0.13228	0	0.13228	0	0	0	0	0	0	0	0	0	0	0	0
TCGA-NH-A8F7	0	0	0	0	0	0	0	0	0	0	0	0	0	0	0	0	0
TCGA-NH-A8F8	2.47888	2.47888	2.47888	1.50643	0.690485	0.211515	0.00763908	0.0123074	0.0505028	0	0	0	0	0	0	0	0
TCGA-QG-A5YV	0.476784	0.476784	0.476784	0.0241994	0.00481473	0.0312957	0.00481473	0.00481473	0.406845	0	0	0	0	0	0	0	0
TCGA-QG-A5YW	1.75015	0.522181	0.520453	0.349526	0.132994	0.0234259	0.000392065	0.000392065	0.0137223	0.00172786	0.00172786	1.22797	1.20619	0.204138	1.00205	0.0217847	0.0217847
TCGA-QG-A5YX	7.21638	7.21638	7.19791	5.98113	0.54765	0.370462	0.0320849	0.0655852	0.201002	0.0184657	0.0184657	0	0	0	0	0	0
TCGA-QG-A5Z1	0.000390579	0.00029424	5.16431e-05	0	2.58216e-05	0	0	0	2.58216e-05	0.000242597	0.000242597	9.63386e-05	9.63386e-05	0	9.63386e-05	0	0
TCGA-QG-A5Z2	2.50785	2.24382	2.21523	0.964829	0.167982	0.114558	0.00183319	0.00183319	0.964191	0.0285978	0.0285978	0.264028	0.264028	0.0586621	0.205366	0	0
TCGA-QL-A97D	3.45355	3.45355	3.45355	2.90098	0.319341	0.233226	0	0	0	0	0	0	0	0	0	0	0
TCGA-RU-A8FL	0.0787259	0.0787259	0.0787259	0.0492037	0.0147611	0.0147611	0	0	0	0	0	0	0	0	0	0	0
TCGA-SS-A7HO	0.446077	0.446077	0.446077	0	0.0337937	0.0337937	0.21628	0.0675874	0.0946224	0	0	0	0	0	0	0	0
TCGA-T9-A92H	5.54154	0.0858321	0.0858321	0.0321871	0.00536451	0.0482806	0	0	0	0	0	5.45571	5.45571	0.10024	5.35547	0	0
TCGA-WS-AB45	0.0265745	0.000834593	0	0	0	0	0	0	0	0.000834593	0.000834593	0.0257399	0	0	0	0.0257399	0.0257399
TCGA-AF-2687	0.161362	0.0540852	0.053223	0.0280079	0.00369255	0.000776958	0.000776958	0.000776958	0.0191917	0.000862139	0.000862139	0.107277	0.00229614	1.94373e-05	0.0022767	0.104981	0.104981
TCGA-AF-2690	0.0229446	0.000305334	5.00561e-05	0	0	2.45014e-05	0	2.55546e-05	0	0.000255278	0.000255278	0.0226393	0.0226148	0	0.0226148	2.45014e-05	2.45014e-05
TCGA-AF-2691	0.0641744	0.0569057	0.0568797	0.0469598	0.0042442	0.00178347	0.000463365	0.000584243	0.0028446	2.60322e-05	2.60322e-05	0.00726864	0.00548729	0.000132518	0.00535477	0.00178136	0.00178136
TCGA-AF-2692	1.66269	1.65505	1.64903	1.23254	0.180493	0.106114	0.0116876	0.0193199	0.0988754	0.00601874	0.00601874	0.00764359	0.00524913	0.0044565	0.00079263	0.00239446	0.00239446
TCGA-AF-2693	1.76579	1.76	1.75984	1.55216	0.0489878	0.0622452	0	0.0240121	0.0724301	0.000165042	0.000165042	0.00578506	0.00576002	0	0.00576002	2.50436e-05	2.50436e-05
TCGA-AF-3400	0.0205915	0.0134449	0.0120332	0.00638822	0.00124837	0.00124547	9.89598e-05	0.000231068	0.00282113	0.00141173	0.00141173	0.00714659	0.00529809	0	0.00529809	0.00184849	0.00184849
TCGA-AF-3911	0.499287	0.499287	0.499287	0.433643	0.0176922	0.039167	0.00292837	0.00292837	0.00292837	0	0	0	0	0	0	0	0
TCGA-AF-3913	0.0120856	0.000235821	0.00020816	6.02614e-05	3.9462e-05	0	0	9.33126e-06	9.91054e-05	2.76614e-05	2.76614e-05	0.0118498	0.00394712	0	0.00394712	0.00790264	0.00790264
TCGA-AF-4110	0.587377	0.587377	0.550083	0.487483	0.0153171	0.0193129	0	0.00932345	0.0186469	0.0372938	0.0372938	0	0	0	0	0	0
TCGA-AF-5654	0.0408215	0.0408215	0.040407	0.0197891	0.0189602	0.000207216	0.000207216	0.000207216	0.00103608	0.000414431	0.000414431	0	0	0	0	0	0
TCGA-AF-6136	0.142735	0.0409567	0.0408451	0.0407335	0	5.57993e-05	0	0	5.57993e-05	0.000111599	0.000111599	0.101778	0.101778	0.0102671	0.0915108	0	0
TCGA-AF-6655	0.0461767	0.0460463	0.0459159	8.07243e-05	0.0229176	0.0229176	0	0	0	0.000130437	0.000130437	0.000130437	9.94255e-05	4.97127e-05	4.97127e-05	3.10116e-05	3.10116e-05
TCGA-AF-6672	0.903472	0.880455	0.880455	0.691164	0.0777245	0.0723205	0	0.00420313	0.0350427	0	0	0.0230171	0.0230171	0	0.0230171	0	0
TCGA-AF-A56K	2.55769	2.54373	2.53792	2.09953	0.230748	0.135539	0.00666207	0.0086977	0.0567404	0.00581609	0.00581609	0.0139586	0.00348966	0.00348966	0	0.010469	0.010469
TCGA-AF-A56L	0.335397	0.335397	0.335397	0	0	0	0.0670793	0.0670793	0.201238	0	0	0	0	0	0	0	0
TCGA-AF-A56N	4.40222	4.40222	4.38899	3.43982	0.438606	0.200436	0.0152565	0.0386516	0.256225	0.0132273	0.0132273	0	0	0	0	0	0
TCGA-AG-3574	0.0317079	0.0282674	0.0282031	0.0224663	0.00327191	0.00132232	3.21537e-05	3.21537e-05	0.00107822	6.43074e-05	6.43074e-05	0.00344045	0.00344045	0	0.00344045	0	0
TCGA-AG-3575	0.0559494	0.0369237	0.0366989	0.0264445	0.00426415	0.0016604	1.13088e-05	0.000210627	0.00410794	0.000224735	0.000224735	0.0190257	0.00406824	0.00173248	0.00233576	0.0149575	0.0149575
TCGA-AG-3578	3.79134	3.00549	2.99272	1.89117	0.635883	0.221469	0.0204807	0.0436227	0.180099	0.0127674	0.0127674	0.785856	0.0381386	0.00728515	0.0308534	0.747717	0.747717
TCGA-AG-3580	0.878636	0.718102	0.713267	0.530259	0.0787811	0.0511286	0.00443623	0.00789968	0.0407631	0.00483463	0.00483463	0.160533	0.155267	0.0397614	0.115506	0.00526611	0.00526611
TCGA-AG-3581	0.430125	0.425363	0.42361	0.269641	0.0905559	0.0271958	0.0043127	0.00595183	0.0259525	0.00175319	0.00175319	0.00476143	0.00380217	0.000534861	0.0032673	0.000959262	0.000959262
TCGA-AG-3582	3.32708	3.04437	3.03449	1.86702	0.203557	0.163609	0.112159	0.29029	0.397858	0.00987801	0.00987801	0.282712	0.264648	0.0601949	0.204453	0.0180642	0.0180642
TCGA-AG-3583	0.0219633	0.00830646	0.00693308	0.00544993	0.000366157	0.000349108	1.10828e-05	0.000358793	0.000398008	0.00137338	0.00137338	0.0136569	0.0110772	0.000848241	0.010229	0.00257967	0.00257967
TCGA-AG-3584	0.131067	0.12427	0.123773	0.0876752	0.0131738	0.00891202	0.00137009	0.00220808	0.0104337	0.000497176	0.000497176	0.00679708	0.00622508	0.000957705	0.00526738	0.000571994	0.000571994
TCGA-AG-3586	0.0586495	0.0456667	0.0453997	0.0336064	0.00584571	0.00494677	0	0	0.00100079	0.000267032	0.000267032	0.0129828	0.012598	1.11834e-05	0.0125868	0.000384769	0.000384769
TCGA-AG-3587	0.911879	0.902918	0.895849	0.667363	0.0868054	0.0530894	0.00657388	0.00992937	0.072088	0.00706853	0.00706853	0.00896096	0.00802214	0.0034641	0.00455804	0.000938822	0.000938822
TCGA-AG-3591	3.09146	0	0	0	0	0	0	0	0	0	0	3.09146	3.09146	0.0903422	3.00112	0	0
TCGA-AG-3592	3.54876	3.18041	3.17056	2.56498	0.348907	0.111055	0.0148988	0.0228924	0.107827	0.00985143	0.00985143	0.368348	0.361188	0.0334138	0.327774	0.00716011	0.00716011
TCGA-AG-3593	0.0170771	0.00688603	0.00687743	0.00573172	0	0.000568559	0	4.29642e-06	0.000572856	8.59284e-06	8.59284e-06	0.0101911	0.0101911	0.0015321	0.008659	0	0
TCGA-AG-3594	0.0495915	0.0307585	0.030547	0.0255408	0.00227232	0.00120689	0	0	0.001527	0.000211475	0.000211475	0.018833	0.0185785	0.000610799	0.0179677	0.0002545	0.0002545
TCGA-AG-3598	0.0584708	0.0236829	0.0218193	0.015098	0.00244509	0.00146671	0.000330527	0.000330527	0.00214843	0.00186364	0.00186364	0.0347879	0.00728365	0.00182596	0.00545769	0.0275042	0.0275042
TCGA-AG-3599	0.328862	0.247612	0.245827	0.182986	0.0223423	0.0170304	0.00244535	0.00594208	0.0150804	0.00178507	0.00178507	0.08125	0.0766475	0.00324267	0.0734048	0.0046025	0.0046025
TCGA-AG-3600	0.058725	0.0538111	0.0537826	0.00755594	0.00269286	0.00157085	0.00328136	0.0165414	0.0221402	2.84884e-05	2.84884e-05	0.00491395	0.00399112	0.000733497	0.00325762	0.000922832	0.000922832
TCGA-AG-3601	0.0310854	0.0128714	0.0101866	0.00534719	0.00145932	0.000830669	0	0	0.00254938	0.0026848	0.0026848	0.018214	0.0113263	0.0013014	0.0100249	0.0068877	0.0068877
TCGA-AG-3602	0.235729	0.227454	0.225307	0.181047	0.0177614	0.0102204	0.000968795	0.00297153	0.0123373	0.00214712	0.00214712	0.00827563	0.00688995	0.000458918	0.00643103	0.00138568	0.00138568
TCGA-AG-3605	1.03378	1.01103	1.00138	0.0817813	0.0232159	0.0295743	0.437753	0.207043	0.222012	0.00964589	0.00964589	0.0227565	0.0161629	0.00140148	0.0147614	0.00659354	0.00659354
TCGA-AG-3608	0.02599	0.0198898	0.019687	0.0157558	0.00156346	0.000800496	0.000406535	0.000336947	0.000823806	0.000202811	0.000202811	0.00610014	0.00428637	7.76838e-05	0.00420869	0.00181377	0.00181377
TCGA-AG-3609	0.169875	0.134067	0.134052	0.0935239	0.0140432	0.00724268	0.00409265	0.00144544	0.0137037	1.53405e-05	1.53405e-05	0.035808	0.0343888	0.0103621	0.0240267	0.0014192	0.0014192
TCGA-AG-3611	0.119221	0.0820298	0.0818772	0.064249	0.00526093	0.0032727	0.00037812	0.000831863	0.00788463	0.000152587	0.000152587	0.0371914	0.0159835	0.00192276	0.0140607	0.0212079	0.0212079
TCGA-AG-3612	0.145574	0.141778	0.141265	0.084234	0.0327529	0.0122816	0.000792531	0.0035812	0.00762299	0.000512422	0.000512422	0.00379608	0.00331601	0.00117767	0.00213834	0.000480072	0.000480072
TCGA-AG-3725	0.664675	0.443345	0.443345	0.22745	0.137282	0.047182	0.00226927	0.00226927	0.0268934	0	0	0.22133	0.221292	0.0340391	0.187253	3.77374e-05	3.77374e-05
TCGA-AG-3726	0.00846771	3.2741e-05	9.079e-06	0	0	0	0	0	9.079e-06	2.3662e-05	2.3662e-05	0.00843497	0.00842167	0.00278423	0.00563744	1.33004e-05	1.33004e-05
TCGA-AG-3727	1.7673	1.6269	1.60738	1.11497	0.175622	0.110978	0.0222344	0.0354192	0.148159	0.0195146	0.0195146	0.140406	0.130213	0.0428658	0.0873473	0.0101927	0.0101927
TCGA-AG-3728	0.063961	0.048041	0.0477309	0.0217702	0.00609993	0.00609993	0.001441	0.00147607	0.0108437	0.000310157	0.000310157	0.01592	0.0158855	0.00792552	0.00795998	3.44588e-05	3.44588e-05
TCGA-AG-3731	0.865784	0.670323	0.670153	0.538295	0.118673	0.00698077	0	0	0.00620512	0.00016946	0.00016946	0.195461	0.195461	0.0279231	0.167538	0	0
TCGA-AG-3732	0	0	0	0	0	0	0	0	0	0	0	0	0	0	0	0	0
TCGA-AG-3742	0.0718586	0.0718586	0.0718586	0	0.0718586	0	0	0	0	0	0	0	0	0	0	0	0
TCGA-AG-3878	0.0289285	0.0206988	0.0192205	0.0103681	0.00226068	0.00153018	0.000464865	0.00153018	0.00306648	0.00147827	0.00147827	0.00822965	0.00820609	0.000522468	0.00768362	2.3558e-05	2.3558e-05
TCGA-AG-3881	2.07301	2.0689	2.05312	1.46344	0.196776	0.144449	0.0225985	0.0385939	0.187271	0.0157786	0.0157786	0.00410779	0.00188178	0.000515427	0.00136635	0.002226	0.002226
TCGA-AG-3882	0.201096	0.201075	0.200635	0.012847	0.00524865	0.00484515	0.0247896	0.0885312	0.0643735	0.000440182	0.000440182	2.11441e-05	1.05721e-05	0	1.05721e-05	1.05721e-05	1.05721e-05
TCGA-AG-3883	0.0764104	0.0459831	0.0454461	0.031991	0.0053754	0.00266455	0.000915791	0.00152405	0.00297535	0.000536963	0.000536963	0.0304273	0.0288992	0.00406176	0.0248374	0.00152806	0.00152806
TCGA-AG-3885	4.50269	3.32267	3.30199	2.24752	0.427567	0.24407	0.0326397	0.0601665	0.29003	0.0206816	0.0206816	1.18002	1.12113	0.582266	0.538861	0.0588948	0.0588948
TCGA-AG-3887	0.849724	0.84352	0.838703	0.486452	0.187101	0.0600279	0.00600818	0.0142071	0.0849067	0.00481687	0.00481687	0.00620393	0.00508136	0.00230282	0.00277855	0.00112257	0.00112257
TCGA-AG-3890	0.34356	0.327978	0.324362	0.244685	0.0304797	0.0190806	0.00358671	0.00605994	0.02047	0.00361607	0.00361607	0.0155818	0.0138933	0.0051002	0.0087931	0.00168846	0.00168846
TCGA-AG-3892	0.047128	0.0441846	0.0435596	0.0304789	0.00477034	0.00261066	0.000215064	0.000542348	0.00494229	0.000624953	0.000624953	0.00294343	0.00282529	0.000667229	0.00215806	0.000118135	0.000118135
TCGA-AG-3893	0.0104117	0.00938193	0.00853862	8.05588e-05	0	0.000746864	0.000696888	0.000746864	0.00626745	0.000843309	0.000843309	0.00102977	0.000616903	0	0.000616903	0.000412864	0.000412864
TCGA-AG-3894	0.0889387	0.0839708	0.0836605	0.0550185	0.0147948	0.00518344	0.000891285	0.00160252	0.00617001	0.000310291	0.000310291	0.00496793	0.00405921	0.00103091	0.0030283	0.000908718	0.000908718
TCGA-AG-3896	0.140389	0.123623	0.123356	0.0929895	0.0144678	0.00889179	0.000613598	2.69385e-05	0.00636641	0.000266831	0.000266831	0.0167664	0.0137327	0.0083599	0.00537281	0.00303365	0.00303365
TCGA-AG-3898	0.117965	0.061484	0.0612714	0.00691228	0.00265617	0.000729847	0.0254218	0.0112176	0.0143338	0.000212555	0.000212555	0.0564809	0.0323972	0.0107782	0.021619	0.0240837	0.0240837
TCGA-AG-3901	0.487901	0.461761	0.460307	0.35153	0.0426344	0.0281602	0.00225793	0.00627372	0.0294511	0.00145418	0.00145418	0.0261399	0.00878197	0.000846485	0.00793549	0.0173579	0.0173579
TCGA-AG-3902	0.155077	0.155077	0.155077	0.0775384	0	0	0	0	0.0775384	0	0	0	0	0	0	0	0
TCGA-AG-3909	0.0413216	0.0162911	0.0150029	0.0102446	0.00104112	0.0020406	0.000416449	0.000416449	0.000843691	0.00128814	0.00128814	0.0250305	0.0200116	1.10317e-05	0.0200006	0.0050189	0.0050189
TCGA-AG-3999	13.8161	13.7762	13.677	10.1423	1.42792	0.905377	0.129142	0.186893	0.885328	0.0991969	0.0991969	0.0399012	0.0218947	0.00646094	0.0154338	0.0180065	0.0180065
TCGA-AG-4001	1.15377	1.15295	1.14888	0.134336	0.0440243	0.0297312	0.160972	0.403578	0.376241	0.00406888	0.00406888	0.000815279	0.000815279	0	0.000815279	0	0
TCGA-AG-4005	4.71141	4.69254	4.66915	2.92264	1.00859	0.316753	0.0361893	0.0743784	0.310594	0.023391	0.023391	0.0188699	0.0166182	0.00621348	0.0104048	0.00225169	0.00225169
TCGA-AG-4007	0.0131438	0.0131105	0.0101105	0.00715368	0.00143074	0.000190765	0.000190765	0.000190765	0.000953824	0.00299997	0.00299997	3.32878e-05	3.32878e-05	1.10959e-05	2.21919e-05	0	0
TCGA-AG-4008	0.0810282	0.0572567	0.0571003	0.0444773	0.00619212	0.00306428	0.000344062	0.000483076	0.0025395	0.000156392	0.000156392	0.0237715	0.0100091	0.000834089	0.00917497	0.0137625	0.0137625
TCGA-AG-4015	0.0201718	0.0165879	0.0122417	0.00549397	0.000915662	0.000915662	1.96917e-05	1.96917e-05	0.00487697	0.00434625	0.00434625	0.00358388	0.00358388	0.00358388	0	0	0
TCGA-AG-4021	0.745478	0.745478	0.744205	0.632911	0.0343735	0.0620664	0.00307698	0.0037136	0.00806381	0.00127323	0.00127323	0	0	0	0	0	0
TCGA-AG-4022	34.7705	34.6966	34.5242	27.9353	2.54617	1.88044	0.178088	0.32824	1.65593	0.172484	0.172484	0.0738782	0.0359191	0.0117122	0.0242069	0.037959	0.037959
TCGA-AG-A002	2.43088	2.381	2.36322	1.81083	0.241467	0.143328	0.0175116	0.02379	0.126298	0.0177784	0.0177784	0.0498766	0.0125289	0.000774231	0.0117547	0.0373477	0.0373477
TCGA-AG-A008	0.909312	0.879619	0.873291	0.660004	0.0864532	0.0586101	0.00512674	0.0110365	0.0520612	0.00632783	0.00632783	0.0296931	0.00864052	0.00151467	0.00712584	0.0210526	0.0210526
TCGA-AG-A00C	0.770193	0.754065	0.749548	0.575784	0.0655743	0.0470071	0.00524547	0.0102525	0.0456845	0.00451712	0.00451712	0.0161276	0.00381045	0.000283265	0.00352719	0.0123171	0.0123171
TCGA-AG-A00H	0.0633031	0.050719	0.0501112	0.0340001	0.00515141	0.0023856	0.00168424	0.00169933	0.00519044	0.000607817	0.000607817	0.0125841	0.0114234	0.00422225	0.00720116	0.00116068	0.00116068
TCGA-AG-A00Y	0.499931	0.086486	0.0856528	0.0517728	0.00505877	0.00553294	0.002982	0.00588936	0.0144169	0.000833281	0.000833281	0.413445	0.00559666	0.00245217	0.00314449	0.407848	0.407848
TCGA-AG-A011	1.55699	1.52016	1.51387	1.19549	0.128671	0.0829134	0.0104427	0.0174147	0.0789356	0.00629235	0.00629235	0.0368255	0.0132535	0.00148235	0.0117711	0.023572	0.023572
TCGA-AG-A014	0.0354818	0.0151433	0.0149193	0.00271512	0.00125393	0.000528516	0.00435248	0.00239387	0.00367543	0.000223988	0.000223988	0.0203385	0.0113917	0.000731777	0.0106599	0.00894677	0.00894677
TCGA-AG-A015	0.0598672	0.0335115	0.0334903	0.0234007	0.00399708	0.00277021	0.000352633	0.000535602	0.00243405	2.12139e-05	2.12139e-05	0.0263558	0.00477968	7.70399e-05	0.00470264	0.0215761	0.0215761
TCGA-AG-A016	0.702658	0.68172	0.678764	0.513069	0.0768505	0.0447545	0.00266282	0.00462288	0.036804	0.00295596	0.00295596	0.0209379	0.0040043	9.37903e-05	0.00391051	0.0169336	0.0169336
TCGA-AG-A01J	0.026695	0.0179117	0.0134285	0.00978487	0.00183376	0.000616047	1.6276e-05	0.000343424	0.000834146	0.00448314	0.00448314	0.00878329	0.00442132	0.00327148	0.00114984	0.00436197	0.00436197
TCGA-AG-A01L	0.031655	0.0114692	0.0114692	0.00623925	0.00183507	0.00220209	0	0	0.0011928	0	0	0.0201858	0.00550522	0.00183507	0.00367015	0.0146806	0.0146806
TCGA-AG-A01N	0.019451	0.0128635	0.0128635	0.00418064	0.00026799	0.000911165	0.00241191	0.00241191	0.0026799	0	0	0.00658747	0.000122268	3.28638e-05	8.94041e-05	0.0064652	0.0064652
TCGA-AG-A01W	0.46414	0.445636	0.443676	0.280379	0.0826399	0.033643	0.00499117	0.00703684	0.0349862	0.00195965	0.00195965	0.0185043	0.0161612	0.0045774	0.0115838	0.00234313	0.00234313
TCGA-AG-A01Y	0.507921	0.485669	0.482627	0.299264	0.0911866	0.037898	0.0057418	0.0127974	0.0357391	0.00304174	0.00304174	0.0222525	0.021034	0.00738356	0.0136505	0.00121845	0.00121845
TCGA-AG-A020	1.05376	0.973655	0.96773	0.622297	0.189611	0.0716977	0.00998152	0.0167859	0.0573574	0.00592447	0.00592447	0.0801058	0.0783445	0.028414	0.0499305	0.00176131	0.00176131
TCGA-AG-A023	0.115656	0.111787	0.111747	0.0643557	0.0218064	0.00793024	0.000320995	0.00288896	0.014445	4.00797e-05	4.00797e-05	0.00386872	8.39203e-06	0	8.39203e-06	0.00386033	0.00386033
TCGA-AG-A025	0.025835	0.00466131	0.00415048	0.00153249	0.000255414	0.000255414	0	0	0.00210717	0.000510829	0.000510829	0.0211737	0.0165572	0.00607886	0.0104783	0.00461655	0.00461655
TCGA-AG-A026	4.31441	4.07606	4.05723	2.55627	0.883831	0.291123	0.0301115	0.0714502	0.224442	0.018834	0.018834	0.238348	0.228505	0.0779477	0.150557	0.00984333	0.00984333
TCGA-AG-A02G	0.198791	0.129804	0.128897	0.0954881	0.0125484	0.010452	0.000403432	0.00181545	0.00818915	0.000907723	0.000907723	0.0689869	0.0639296	0.00618116	0.0577485	0.00505731	0.00505731
TCGA-AG-A02N	0.56711	0.557124	0.555081	0.354363	0.116335	0.0353129	0.00452775	0.00857304	0.0359698	0.00204309	0.00204309	0.00998589	0.00964185	0.00301785	0.006624	0.000344044	0.000344044
TCGA-AG-A02X	0.121206	0.0945488	0.091861	0.0639873	0.0102462	0.00629237	0.00169196	0.0022906	0.00735251	0.0026878	0.0026878	0.0266573	0.0206709	0.00112565	0.0195453	0.00598639	0.00598639
TCGA-AG-A032	0.0600394	0.00689662	0.00687758	0.00420843	0.00103164	0.000327504	0	0	0.00131002	1.90356e-05	1.90356e-05	0.0531427	0.049934	0.0255378	0.0243963	0.00320871	0.00320871
TCGA-AG-A036	0.487711	0.391401	0.386427	0.232179	0.0821788	0.0308449	0.00344832	0.00549107	0.0322846	0.0049744	0.0049744	0.0963104	0.0937107	0.0286655	0.0650452	0.00259963	0.00259963
TCGA-AH-6544	0.043489	0.0289927	0.0289927	0.0289927	0	0	0	0	0	0	0	0.0144963	0	0	0	0.0144963	0.0144963
TCGA-AH-6547	0.275021	0.274581	0.273308	0.216534	0.0179356	0.0277621	0.00208719	0.00356781	0.00542209	0.00127231	0.00127231	0.000440826	0.000327152	0.000139054	0.000188098	0.000113675	0.000113675
TCGA-AH-6549	0.0882277	0.0882277	0.0880151	0.0655223	0.00684562	0.00195589	0.00195589	0.00195589	0.00977945	0.000212597	0.000212597	0	0	0	0	0	0
TCGA-AH-6643	3.99609	3.99609	3.99609	3.29257	0.430918	0.176571	0.00929322	0.00929322	0.0774435	0	0	0	0	0	0	0	0
TCGA-AH-6644	0.12642	0.12642	0.12642	0.0842801	0.02107	0.02107	0	0	0	0	0	0	0	0	0	0	0
TCGA-AH-6897	6.40445	6.00137	5.97635	3.32072	1.40414	0.29004	0.0104697	0.0313253	0.919648	0.0250214	0.0250214	0.403085	0.345501	0.134362	0.21114	0.0575835	0.0575835
TCGA-AH-6903	9.78873	9.78873	9.78873	7.18206	0.334503	0.328095	0.0208247	0.0630939	1.86015	0	0	0	0	0	0	0	0
TCGA-BM-6198	0.0781397	0.0521961	0.0518872	0.0389154	0.0129718	0	0	0	0	0.000308853	0.000308853	0.0259436	0.0259436	0	0.0259436	0	0
TCGA-CI-6619	0.339908	0.339908	0.339692	0.308131	0.0308533	8.8405e-05	8.8405e-05	8.8405e-05	0.000442025	0.000216558	0.000216558	0	0	0	0	0	0
TCGA-CI-6620	0.0680205	0.0340102	0.0340102	0.0226735	0.0113367	0	0	0	0	0	0	0.0340102	0.0340102	0	0.0340102	0	0
TCGA-CI-6621	0.208785	0.119341	0.1193	0.0447633	0	0	0.00993822	0.0248455	0.0397529	4.12945e-05	4.12945e-05	0.0894439	0.0753212	0.0279839	0.0473373	0.0141227	0.0141227
TCGA-CI-6622	6.78761	6.30462	6.29472	5.62431	0.253213	0.209786	0.00952934	0.0450919	0.152786	0.00990324	0.00990324	0.482985	0.48223	0.00896224	0.473268	0.000754248	0.000754248
TCGA-CI-6623	0.104819	0.0803434	0.0761004	0.0737496	6.71672e-05	6.71672e-05	6.71672e-05	6.71672e-05	0.00208218	0.00424301	0.00424301	0.024476	0.0244489	0	0.0244489	2.71654e-05	2.71654e-05
TCGA-CI-6624	0.000251842	0.000251842	0.000251842	8.39474e-05	8.39474e-05	0	0	0	8.39474e-05	0	0	0	0	0	0	0	0
TCGA-CL-4957	0.220133	0.220133	0.220085	0.0805074	0.0145294	0.0450174	0	0	0.080031	4.78654e-05	4.78654e-05	0	0	0	0	0	0
TCGA-CL-5917	0.0539643	0.0539643	0.0539643	0.0539643	0	0	0	0	0	0	0	0	0	0	0	0	0
TCGA-CL-5918	1.69083	1.69083	1.68807	1.5719	0.0470939	0.016258	0	0.00276732	0.0500424	0.00276732	0.00276732	0	0	0	0	0	0
TCGA-DC-4745	0	0	0	0	0	0	0	0	0	0	0	0	0	0	0	0	0
TCGA-DC-4749	2.74309	2.74111	2.72934	0.0840246	0.0109383	0.0248355	0.159222	1.54181	0.908507	0.011763	0.011763	0.00198532	0	0	0	0.00198532	0.00198532
TCGA-DC-5337	0.000147374	7.36868e-05	0	0	0	0	0	0	0	7.36868e-05	7.36868e-05	7.36868e-05	7.36868e-05	0	7.36868e-05	0	0
TCGA-DC-5869	0.207717	0.207717	0.207717	0.0389469	0.0843851	0.0843851	0	0	0	0	0	0	0	0	0	0	0
TCGA-DC-6154	0.0969012	0.0581407	0.0581407	0.0484506	0.00161502	0.00161502	0.00161502	0.00161502	0.00323004	0	0	0.0387605	0.0387605	0.0258403	0.0129202	0	0
TCGA-DC-6155	0.0305209	0.0139204	0.0127	0.00463277	0.001864	0.000249624	0.00119637	0.000548228	0.00420901	0.00122044	0.00122044	0.0166004	0.0131323	0.00583536	0.00729694	0.00346812	0.00346812
TCGA-DC-6156	0.100054	0	0	0	0	0	0	0	0	0	0	0.100054	0.100054	0	0.100054	0	0
TCGA-DC-6157	0	0	0	0	0	0	0	0	0	0	0	0	0	0	0	0	0
TCGA-DC-6158	0.275295	0.196666	0.196666	0.177009	0.00982861	0.00982861	0	0	0	0	0	0.0786289	0	0	0	0.0786289	0.0786289
TCGA-DC-6160	1.25664	0.409162	0.401119	0.3217	0.022452	0.0113935	0.00737228	0.0113935	0.0268083	0.00804249	0.00804249	0.847477	0.816313	0.448905	0.367408	0.0311646	0.0311646
TCGA-DC-6681	0.41392	0.41392	0.41392	0.318342	0.0447786	0.0282218	0.00752582	0.00752582	0.00752582	0	0	0	0	0	0	0	0
TCGA-DC-6682	0.493122	0.493122	0.492864	0.278658	0.0341213	0.132694	0	0.00947815	0.0379126	0.000257774	0.000257774	0	0	0	0	0	0
TCGA-DC-6683	0	0	0	0	0	0	0	0	0	0	0	0	0	0	0	0	0
TCGA-DT-5265	0.00987882	0.00983962	0.00861457	0.00306263	0.000651725	0.000612526	0.000612526	0.000612526	0.00306263	0.00122505	0.00122505	3.91989e-05	3.91989e-05	0	3.91989e-05	0	0
TCGA-DY-A0XA	0.0691668	0.0691668	0.0691668	0	0	0.0691668	0	0	0	0	0	0	0	0	0	0	0
TCGA-DY-A1DC	0.201831	0.158605	0.158529	0.0648393	0.0936567	0	0	3.28966e-05	0	7.58354e-05	7.58354e-05	0.0432262	0.0432262	0.00576349	0.0374627	0	0
TCGA-DY-A1DD	0.000155803	0.000155803	0	0	0	0	0	0	0	0.000155803	0.000155803	0	0	0	0	0	0
TCGA-DY-A1DE	0.0932357	0.0467429	0.0464617	0.0155276	0	0.015467	0	0.015467	0	0.000281156	0.000281156	0.0464928	0.0464011	0	0.0464011	9.17018e-05	9.17018e-05
TCGA-DY-A1DF	0.0349359	4.90979e-05	4.90979e-05	4.90979e-05	0	0	0	0	0	0	0	0.0348868	0.0347995	0	0.0347995	8.72972e-05	8.72972e-05
TCGA-DY-A1DG	0.0439301	0.0439301	0.0438777	0.0438777	0	0	0	0	0	5.24852e-05	5.24852e-05	0	0	0	0	0	0
TCGA-DY-A1H8	0.0959974	5.02868e-05	0	0	0	0	0	0	0	5.02868e-05	5.02868e-05	0.0959471	0.0959471	0	0.0959471	0	0
TCGA-EF-5830	0.0653119	0.0653119	0.0653119	0	0	0.0653119	0	0	0	0	0	0	0	0	0	0	0
TCGA-EF-5831	0.154848	0.154848	0.154848	0.135492	0.00967801	0.00967801	0	0	0	0	0	0	0	0	0	0	0
TCGA-EI-6506	0.154565	0.154565	0.154565	0.0772826	0.0128804	0.0128804	0	0	0.0515217	0	0	0	0	0	0	0	0
TCGA-EI-6507	6.15093	6.13973	6.07735	0.196121	0.0700528	0.0945808	0.0279655	0.0499092	5.63873	0.0623809	0.0623809	0.011191	0.00529285	0.00118741	0.00410544	0.0058981	0.0058981
TCGA-EI-6508	0.15991	0.106607	0.106607	0.0533034	0	0	0	0	0.0533034	0	0	0.0533034	0.0533034	0.0266517	0.0266517	0	0
TCGA-EI-6509	0.00246986	0.00246986	0.00246986	0	0	0	0	0.00246986	0	0	0	0	0	0	0	0	0
TCGA-EI-6510	0.55734	0.364298	0.364298	0.302959	0.026363	0.0164524	0.0043873	0.0043873	0.00974956	0	0	0.193041	0.144781	0.0643471	0.0804339	0.0482603	0.0482603
TCGA-EI-6511	0.624323	0.227026	0.227026	0.227026	0	0	0	0	0	0	0	0.397296	0.283783	0.113513	0.17027	0.113513	0.113513
TCGA-EI-6512	0.639361	0.487132	0.487132	0.14208	0.0761144	0.0405944	0	0	0.228343	0	0	0.152229	0.152229	0.0913373	0.0608915	0	0
TCGA-EI-6513	2.0338	2.02512	2.02267	0.0767157	0.0555788	0.0127117	1.33302	0.235849	0.308794	0.00244955	0.00244955	0.00868521	0.00864702	0	0.00864702	3.8189e-05	3.8189e-05
TCGA-EI-6514	0.64286	0.64286	0.64286	0.43816	0.10235	0.10235	0	0	0	0	0	0	0	0	0	0	0
TCGA-EI-6881	0.545079	0.545079	0.544638	0.482425	0.0318939	0.0237039	0	0	0.00661503	0.000441002	0.000441002	0	0	0	0	0	0
TCGA-EI-6882	4.38262	4.29834	4.2871	1.02232	1.02991	0.0646885	0.0112375	0.0112375	2.14771	0.0112375	0.0112375	0.0842812	0.0842812	0	0.0842812	0	0
TCGA-EI-6883	0.0852	0.0680592	0.0680592	0.0280879	0.00216061	0	0	0	0.0378107	0	0	0.0171408	0	0	0	0.0171408	0.0171408
TCGA-EI-6884	0.0416653	0.0318852	0.0306028	0.019925	0.00976736	0.000131043	0.000105346	0.000105346	0.000568706	0.00128242	0.00128242	0.00978005	0.00978005	2.11423e-05	0.00975891	0	0
TCGA-EI-6885	0.0234486	0.0233766	0.0232773	0.0232773	0	0	0	0	0	9.92778e-05	9.92778e-05	7.2066e-05	7.2066e-05	0	7.2066e-05	0	0
TCGA-EI-6917	0.00297614	0.0023467	0.00128934	0.000808249	0.000123759	5.65231e-05	1.16856e-06	4.91511e-05	0.00025049	0.00105736	0.00105736	0.000629444	0.000391136	0.00012128	0.000269856	0.000238307	0.000238307
TCGA-EI-7002	0.100574	0.0402863	0.0400808	0.0398249	8.52783e-05	8.52783e-05	0	0	8.52783e-05	0.000205539	0.000205539	0.0602881	0.040245	0.000170557	0.0400744	0.0200431	0.0200431
TCGA-EI-7004	0.00147156	0.00147156	0	0	0	0	0	0	0	0.00147156	0.00147156	0	0	0	0	0	0
TCGA-F5-6464	0.0813505	0.0609252	0.0608764	0.0110684	0.00184474	0.00184474	0.0135281	0.0135281	0.0190623	4.87792e-05	4.87792e-05	0.0204253	0.0203809	0	0.0203809	4.44029e-05	4.44029e-05
TCGA-F5-6465	6.74955	6.73863	6.70631	5.90951	0.391134	0.203311	0.0132954	0.0302579	0.158797	0.0323227	0.0323227	0.0109184	0.0109184	0.00545921	0.00545921	0	0
TCGA-F5-6571	0.0882849	0.0882849	0.0882849	0	0	0	0.0294283	0.0294283	0.0294283	0	0	0	0	0	0	0	0
TCGA-F5-6702	0.139084	0.139084	0.139084	0	0	0	0.108176	0.0154538	0.0154538	0	0	0	0	0	0	0	0
TCGA-F5-6810	0.517318	0.517211	0.517211	0.141135	0.00783491	0.00783491	0	0	0.360406	0	0	0.000107083	0	0	0	0.000107083	0.000107083
TCGA-F5-6811	0	0	0	0	0	0	0	0	0	0	0	0	0	0	0	0	0
TCGA-F5-6812	0.00113454	0.00113454	0	0	0	0	0	0	0	0.00113454	0.00113454	0	0	0	0	0	0
TCGA-F5-6813	0.0758383	0.0758383	0.0758383	0.0505589	0.0126397	0.0126397	0	0	0	0	0	0	0	0	0	0	0
TCGA-F5-6814	1.50853	1.50853	1.50853	0.627132	0.318487	0.0872062	0.00386295	0.00391146	0.467932	0	0	0	0	0	0	0	0
TCGA-F5-6861	0.142575	0.142575	0.142575	0	0	0	0.083169	0.0475252	0.0118813	0	0	0	0	0	0	0	0
TCGA-F5-6863	0.0426746	0.0426746	0.0426746	0.0426746	0	0	0	0	0	0	0	0	0	0	0	0	0
TCGA-F5-6864	0.0528903	0.0528903	0.0528903	0.0264451	0.0264451	0	0	0	0	0	0	0	0	0	0	0	0
TCGA-G5-6233	4.59859	4.46408	4.46393	3.81592	0.224317	0.240614	0.0149219	0.0328662	0.135295	0.000148533	0.000148533	0.13451	0.13451	0.017982	0.116528	0	0
TCGA-G5-6235	0.000220927	0.000220927	0.000220927	0	0	0	0	0	0.000220927	0	0	0	0	0	0	0	0
TCGA-G5-6572	0.0224965	0	0	0	0	0	0	0	0	0	0	0.0224965	0.0224965	0	0.0224965	0	0
TCGA-G5-6641	0.205731	0.104965	0.100766	0.0279907	0.0727757	0	0	0	0	0.0041986	0.0041986	0.100766	0.100766	0	0.100766	0	0
