# Supplementary material for: Patients with mesenchymal tumours and high Fusobacteriales prevalence have worse prognosis in colorectal cancer (CRC)
Source: HighWire-hosted journal article supplement (doi:10.1136/gutjnl-2021-325193), 2021-09-08
Supplement: gutjnl-2021-325193supp006_data_supplement.xlsx [file gutjnl-2021-325193supp006_data_supplement.xlsx]

## Sheet: supplementary_table_5
Supplementary Table 5
Gene	Method	Tail	N	R	95% CI	Unadjusted P-value	FDR-BH adjusted P-value
PIGR	spearman correlation	two-sided	593	0.11	[0.03 0.19]	0.005	0.03
MUC2	spearman correlation	two-sided	593	0.18	[0.1 0.25]	<0.0001	0.0009
REG1A	spearman correlation	two-sided	593	0.18	[0.11 0.26]	<0.0001	0.0005
FCGBP	spearman correlation	two-sided	593	0.14	[0.06 0.21]	0.0009	0.01
GAPDH	spearman correlation	two-sided	593	0.17	[0.09 0.25]	<0.0001	0.001
ACTG1	spearman correlation	two-sided	593	0.11	[0.03 0.19]	0.005	0.03
CLCA1	spearman correlation	two-sided	593	0.12	[0.04 0.2 ]	0.004	0.03
ERBB2	spearman correlation	two-sided	593	-0.11	[-0.19 -0.03]	0.008	0.04
REG3A	spearman correlation	two-sided	593	0.19	[0.11 0.27]	<0.0001	0.0002
REG4	spearman correlation	two-sided	593	0.14	[0.06 0.22]	0.0004	0.006
AGR2	spearman correlation	two-sided	593	0.14	[0.06 0.22]	0.0005	0.007
RPLP0	spearman correlation	two-sided	593	0.11	[0.03 0.19]	0.009	0.046
LCN2	spearman correlation	two-sided	593	0.2	[0.13 0.28]	<0.0001	<0.0001
TFF3	spearman correlation	two-sided	593	0.13	[0.05 0.2 ]	0.002	0.02
KRT18	spearman correlation	two-sided	593	0.12	[0.04 0.2 ]	0.002	0.02
MYH11	spearman correlation	two-sided	593	-0.16	[-0.24 -0.08]	0.0001	0.003
DMBT1	spearman correlation	two-sided	593	0.18	[0.1 0.25]	<0.0001	0.0009
PKM2	spearman correlation	two-sided	593	0.14	[0.06 0.22]	0.0004	0.006
SERPINA1	spearman correlation	two-sided	593	0.15	[0.07 0.23]	0.0002	0.003
ENO1	spearman correlation	two-sided	593	0.17	[0.09 0.24]	<0.0001	0.001
HSPA8	spearman correlation	two-sided	593	0.11	[0.03 0.19]	0.006	0.03
PYGB	spearman correlation	two-sided	593	-0.14	[-0.21 -0.06]	0.0009	0.01
MYH9	spearman correlation	two-sided	593	-0.13	[-0.21 -0.05]	0.001	0.01
PTMA	spearman correlation	two-sided	593	0.11	[0.03 0.19]	0.005	0.03
RPL35	spearman correlation	two-sided	593	0.11	[0.03 0.18]	0.01	0.0496
HSP90B1	spearman correlation	two-sided	593	0.15	[0.07 0.23]	0.0003	0.005
TAGLN	spearman correlation	two-sided	593	-0.14	[-0.21 -0.06]	0.0009	0.01
IL8	spearman correlation	two-sided	593	0.29	[0.22 0.37]	<0.0001	<0.0001
RPL30	spearman correlation	two-sided	593	-0.11	[-0.19 -0.03]	0.006	0.04
TUBA1B	spearman correlation	two-sided	593	0.2	[0.12 0.27]	<0.0001	0.0002
NCRNA00188	spearman correlation	two-sided	593	0.12	[0.04 0.19]	0.005	0.03
PLA2G2A	spearman correlation	two-sided	593	0.17	[0.09 0.25]	<0.0001	0.001
SLC25A5	spearman correlation	two-sided	593	0.13	[0.05 0.21]	0.001	0.01
GNAS	spearman correlation	two-sided	593	-0.12	[-0.2 -0.04]	0.004	0.03
DEFA5	spearman correlation	two-sided	593	0.12	[0.03 0.19]	0.005	0.03
SCD	spearman correlation	two-sided	593	-0.11	[-0.19 -0.03]	0.006	0.03
P4HB	spearman correlation	two-sided	593	0.12	[0.04 0.2 ]	0.003	0.02
SPINK4	spearman correlation	two-sided	593	0.14	[0.06 0.22]	0.0006	0.008
RPSAP58	spearman correlation	two-sided	593	0.11	[0.03 0.19]	0.008	0.04
LDHA	spearman correlation	two-sided	593	0.14	[0.06 0.22]	0.0005	0.007
ASS1	spearman correlation	two-sided	593	0.11	[0.03 0.19]	0.01	0.048
LUM	spearman correlation	two-sided	593	-0.13	[-0.21 -0.05]	0.002	0.02
PGK1	spearman correlation	two-sided	593	0.14	[0.06 0.22]	0.0004	0.006
IGFBP5	spearman correlation	two-sided	593	-0.12	[-0.2 -0.04]	0.002	0.02
CALR	spearman correlation	two-sided	593	0.12	[0.04 0.2 ]	0.003	0.02
C3	spearman correlation	two-sided	593	-0.15	[-0.23 -0.07]	0.0002	0.004
PFN1	spearman correlation	two-sided	593	0.12	[0.04 0.19]	0.005	0.03
ATP5B	spearman correlation	two-sided	593	0.21	[0.14 0.29]	<0.0001	<0.0001
TFF1	spearman correlation	two-sided	593	0.16	[0.08 0.24]	0.0001	0.003
TSPAN1	spearman correlation	two-sided	593	0.13	[0.05 0.21]	0.002	0.02
MIF	spearman correlation	two-sided	593	0.19	[0.11 0.26]	<0.0001	0.0004
TAGLN2	spearman correlation	two-sided	593	0.15	[0.07 0.23]	0.0002	0.003
AEBP1	spearman correlation	two-sided	593	-0.15	[-0.23 -0.07]	0.0003	0.005
PGAP3	spearman correlation	two-sided	593	-0.15	[-0.23 -0.07]	0.0003	0.005
TMBIM6	spearman correlation	two-sided	593	0.13	[0.05 0.21]	0.002	0.02
BSG	spearman correlation	two-sided	593	0.12	[0.04 0.2 ]	0.004	0.03
HMGA1	spearman correlation	two-sided	593	0.15	[0.07 0.23]	0.0002	0.003
ACTA2	spearman correlation	two-sided	593	-0.14	[-0.22 -0.06]	0.0005	0.007
HSPG2	spearman correlation	two-sided	593	-0.11	[-0.19 -0.03]	0.006	0.04
THBS1	spearman correlation	two-sided	593	-0.12	[-0.2 -0.04]	0.002	0.02
LRP1	spearman correlation	two-sided	593	-0.17	[-0.25 -0.09]	<0.0001	0.001
MLEC	spearman correlation	two-sided	593	0.13	[0.05 0.21]	0.002	0.02
MMP11	spearman correlation	two-sided	593	-0.17	[-0.24 -0.09]	<0.0001	0.001
GRN	spearman correlation	two-sided	593	-0.12	[-0.2 -0.04]	0.003	0.02
TUBB2C	spearman correlation	two-sided	593	0.15	[0.07 0.23]	0.0003	0.005
MYL9	spearman correlation	two-sided	593	-0.14	[-0.22 -0.06]	0.0007	0.008
TPI1	spearman correlation	two-sided	593	0.2	[0.12 0.28]	<0.0001	0.0001
SULF1	spearman correlation	two-sided	593	-0.11	[-0.19 -0.03]	0.005	0.03
IGFBP4	spearman correlation	two-sided	593	-0.13	[-0.2 -0.05]	0.002	0.02
A2M	spearman correlation	two-sided	593	-0.17	[-0.25 -0.09]	<0.0001	0.001
LDHB	spearman correlation	two-sided	593	0.12	[0.04 0.2 ]	0.004	0.03
MUC1	spearman correlation	two-sided	593	0.13	[0.05 0.21]	0.001	0.01
LOC647979	spearman correlation	two-sided	593	-0.18	[-0.26 -0.1 ]	<0.0001	0.0006
DEFA6	spearman correlation	two-sided	593	0.12	[0.04 0.2 ]	0.004	0.03
DCN	spearman correlation	two-sided	593	-0.13	[-0.21 -0.05]	0.001	0.01
EIF5A	spearman correlation	two-sided	593	0.21	[0.13 0.28]	<0.0001	<0.0001
TIMP2	spearman correlation	two-sided	593	-0.13	[-0.21 -0.05]	0.001	0.01
MMP1	spearman correlation	two-sided	593	0.2	[0.12 0.28]	<0.0001	0.0001
THBS2	spearman correlation	two-sided	593	-0.14	[-0.22 -0.06]	0.0005	0.007
FKBP4	spearman correlation	two-sided	593	0.13	[0.05 0.21]	0.001	0.01
EIF4A1	spearman correlation	two-sided	593	0.17	[0.09 0.24]	<0.0001	0.001
PPIB	spearman correlation	two-sided	593	0.11	[0.03 0.19]	0.009	0.04
CXCL14	spearman correlation	two-sided	593	-0.11	[-0.19 -0.03]	0.009	0.047
OAZ1	spearman correlation	two-sided	593	0.14	[0.06 0.22]	0.0005	0.007
EPHB3	spearman correlation	two-sided	593	0.11	[0.03 0.19]	0.008	0.04
BTF3	spearman correlation	two-sided	593	0.11	[0.03 0.19]	0.009	0.046
CALD1	spearman correlation	two-sided	593	-0.14	[-0.21 -0.06]	0.0009	0.01
TIMP3	spearman correlation	two-sided	593	-0.16	[-0.24 -0.08]	<0.0001	0.002
IER3	spearman correlation	two-sided	593	0.17	[0.09 0.24]	<0.0001	0.001
CD55	spearman correlation	two-sided	593	0.13	[0.05 0.21]	0.002	0.02
TUBA1C	spearman correlation	two-sided	593	0.16	[0.09 0.24]	<0.0001	0.002
C1S	spearman correlation	two-sided	593	-0.17	[-0.25 -0.09]	<0.0001	0.001
YWHAE	spearman correlation	two-sided	593	0.15	[0.07 0.22]	0.0004	0.006
CTSE	spearman correlation	two-sided	593	0.11	[0.03 0.19]	0.007	0.04
MYO1D	spearman correlation	two-sided	593	-0.12	[-0.2 -0.04]	0.004	0.03
PMEPA1	spearman correlation	two-sided	593	-0.18	[-0.26 -0.11]	<0.0001	0.0005
ATP5A1	spearman correlation	two-sided	593	0.12	[0.04 0.19]	0.005	0.03
PTGES3	spearman correlation	two-sided	593	0.16	[0.09 0.24]	<0.0001	0.002
CXCL5	spearman correlation	two-sided	593	0.24	[0.17 0.32]	<0.0001	<0.0001
ERGIC3	spearman correlation	two-sided	593	-0.11	[-0.18 -0.03]	0.01	0.0496
TMED2	spearman correlation	two-sided	593	0.15	[0.07 0.23]	0.0002	0.004
CTSA	spearman correlation	two-sided	593	-0.11	[-0.19 -0.03]	0.005	0.03
PDIA4	spearman correlation	two-sided	593	0.13	[0.05 0.21]	0.002	0.02
SAT1	spearman correlation	two-sided	593	0.11	[0.03 0.19]	0.005	0.03
GDF15	spearman correlation	two-sided	593	0.12	[0.04 0.2 ]	0.003	0.02
GPI	spearman correlation	two-sided	593	0.11	[0.03 0.19]	0.006	0.03
IGFBP3	spearman correlation	two-sided	593	-0.13	[-0.21 -0.05]	0.002	0.02
XBP1	spearman correlation	two-sided	593	0.15	[0.07 0.23]	0.0002	0.004
MYLK	spearman correlation	two-sided	593	-0.16	[-0.24 -0.09]	<0.0001	0.002
SERPINA3	spearman correlation	two-sided	593	0.12	[0.04 0.2 ]	0.003	0.02
DNAJB1	spearman correlation	two-sided	593	0.12	[0.04 0.2 ]	0.003	0.02
CLDN7	spearman correlation	two-sided	593	0.16	[0.08 0.24]	<0.0001	0.002
FSTL1	spearman correlation	two-sided	593	-0.11	[-0.19 -0.03]	0.007	0.04
TPM2	spearman correlation	two-sided	593	-0.13	[-0.21 -0.05]	0.002	0.02
PRKDC	spearman correlation	two-sided	593	-0.11	[-0.19 -0.03]	0.007	0.04
PAEP	spearman correlation	two-sided	593	0.12	[0.04 0.19]	0.005	0.03
COL17A1	spearman correlation	two-sided	593	-0.12	[-0.2 -0.04]	0.004	0.03
S100A14	spearman correlation	two-sided	593	0.15	[0.07 0.23]	0.0002	0.004
SFRP2	spearman correlation	two-sided	593	-0.12	[-0.2 -0.04]	0.003	0.02
PLCB4	spearman correlation	two-sided	593	-0.12	[-0.2 -0.04]	0.004	0.03
TGOLN2	spearman correlation	two-sided	593	-0.14	[-0.22 -0.06]	0.0004	0.006
TLN1	spearman correlation	two-sided	593	-0.12	[-0.2 -0.04]	0.003	0.02
TMEM176B	spearman correlation	two-sided	593	-0.15	[-0.23 -0.07]	0.0002	0.004
ATP9A	spearman correlation	two-sided	593	-0.21	[-0.29 -0.14]	<0.0001	<0.0001
TMEM176A	spearman correlation	two-sided	593	-0.12	[-0.2 -0.04]	0.003	0.02
CTGF	spearman correlation	two-sided	593	-0.13	[-0.21 -0.05]	0.002	0.02
ZG16	spearman correlation	two-sided	593	0.12	[0.04 0.2 ]	0.004	0.03
VCAN	spearman correlation	two-sided	593	-0.12	[-0.2 -0.04]	0.003	0.02
TPM3	spearman correlation	two-sided	593	0.13	[0.05 0.21]	0.001	0.01
MXRA5	spearman correlation	two-sided	593	-0.13	[-0.21 -0.05]	0.001	0.01
C4A	spearman correlation	two-sided	593	-0.16	[-0.24 -0.08]	0.0001	0.003
FDFT1	spearman correlation	two-sided	593	0.13	[0.05 0.21]	0.001	0.01
CHMP4B	spearman correlation	two-sided	593	-0.15	[-0.22 -0.07]	0.0003	0.005
HNRNPC	spearman correlation	two-sided	593	0.16	[0.08 0.24]	0.0001	0.003
S100A16	spearman correlation	two-sided	593	0.14	[0.06 0.22]	0.0004	0.006
SLC25A3	spearman correlation	two-sided	593	0.21	[0.13 0.28]	<0.0001	<0.0001
SERPINB1	spearman correlation	two-sided	593	0.12	[0.04 0.2 ]	0.004	0.03
TNS1	spearman correlation	two-sided	593	-0.16	[-0.24 -0.08]	0.0001	0.003
ANTXR1	spearman correlation	two-sided	593	-0.13	[-0.21 -0.05]	0.001	0.01
C1R	spearman correlation	two-sided	593	-0.15	[-0.23 -0.07]	0.0003	0.005
CREB3L1	spearman correlation	two-sided	593	0.12	[0.04 0.2 ]	0.004	0.03
FBN1	spearman correlation	two-sided	593	-0.14	[-0.22 -0.06]	0.0008	0.01
SPTAN1	spearman correlation	two-sided	593	-0.12	[-0.2 -0.04]	0.004	0.03
HMGN2	spearman correlation	two-sided	593	0.12	[0.04 0.2 ]	0.003	0.02
GPR56	spearman correlation	two-sided	593	-0.13	[-0.21 -0.05]	0.002	0.02
HUWE1	spearman correlation	two-sided	593	-0.11	[-0.19 -0.03]	0.005	0.03
PPIF	spearman correlation	two-sided	593	0.18	[0.1 0.26]	<0.0001	0.0006
GDI2	spearman correlation	two-sided	593	0.11	[0.03 0.19]	0.007	0.04
DDIT4	spearman correlation	two-sided	593	0.15	[0.07 0.23]	0.0002	0.005
POFUT1	spearman correlation	two-sided	593	-0.17	[-0.24 -0.09]	<0.0001	0.002
MSN	spearman correlation	two-sided	593	-0.11	[-0.18 -0.03]	0.01	0.049
CNN1	spearman correlation	two-sided	593	-0.13	[-0.21 -0.05]	0.001	0.01
TSPO	spearman correlation	two-sided	593	0.11	[0.03 0.19]	0.006	0.04
IDH2	spearman correlation	two-sided	593	0.11	[0.03 0.19]	0.008	0.04
FBLN1	spearman correlation	two-sided	593	-0.18	[-0.26 -0.1 ]	<0.0001	0.0006
HNF4A	spearman correlation	two-sided	593	-0.12	[-0.2 -0.04]	0.003	0.02
TNFRSF6B	spearman correlation	two-sided	593	0.15	[0.07 0.22]	0.0003	0.005
EIF3H	spearman correlation	two-sided	593	-0.11	[-0.18 -0.03]	0.01	0.0497
SULF2	spearman correlation	two-sided	593	-0.14	[-0.22 -0.06]	0.0008	0.01
PRDX2	spearman correlation	two-sided	593	0.12	[0.04 0.2 ]	0.005	0.03
CTSZ	spearman correlation	two-sided	593	-0.17	[-0.24 -0.09]	<0.0001	0.001
SORL1	spearman correlation	two-sided	593	-0.13	[-0.21 -0.05]	0.001	0.01
RAN	spearman correlation	two-sided	593	0.16	[0.08 0.24]	<0.0001	0.002
NAMPT	spearman correlation	two-sided	593	0.11	[0.03 0.19]	0.008	0.04
TNRC18	spearman correlation	two-sided	593	-0.13	[-0.21 -0.05]	0.001	0.01
ODC1	spearman correlation	two-sided	593	0.15	[0.07 0.23]	0.0003	0.005
THY1	spearman correlation	two-sided	593	-0.11	[-0.18 -0.03]	0.01	0.0496
DDOST	spearman correlation	two-sided	593	0.11	[0.03 0.19]	0.006	0.03
CXCL1	spearman correlation	two-sided	593	0.25	[0.18 0.33]	<0.0001	<0.0001
ATP5D	spearman correlation	two-sided	593	0.17	[0.09 0.24]	<0.0001	0.001
SYNPO2	spearman correlation	two-sided	593	-0.16	[-0.24 -0.08]	<0.0001	0.002
CALM3	spearman correlation	two-sided	593	0.12	[0.04 0.2 ]	0.003	0.02
ATP5G3	spearman correlation	two-sided	593	0.16	[0.08 0.24]	<0.0001	0.002
TMED10	spearman correlation	two-sided	593	0.11	[0.03 0.19]	0.007	0.04
ST6GAL1	spearman correlation	two-sided	593	-0.12	[-0.2 -0.04]	0.004	0.03
SERPING1	spearman correlation	two-sided	593	-0.15	[-0.23 -0.07]	0.0002	0.004
NOS2	spearman correlation	two-sided	593	0.18	[0.1 0.26]	<0.0001	0.0007
H2AFZ	spearman correlation	two-sided	593	0.2	[0.12 0.28]	<0.0001	0.0001
PHB2	spearman correlation	two-sided	593	0.17	[0.09 0.24]	<0.0001	0.001
NUMA1	spearman correlation	two-sided	593	-0.2	[-0.28 -0.13]	<0.0001	<0.0001
SNRNP200	spearman correlation	two-sided	593	-0.12	[-0.2 -0.04]	0.004	0.03
PRPF6	spearman correlation	two-sided	593	-0.15	[-0.23 -0.07]	0.0003	0.005
MT2A	spearman correlation	two-sided	593	0.13	[0.06 0.21]	0.001	0.01
CDC25B	spearman correlation	two-sided	593	0.13	[0.05 0.21]	0.002	0.02
SEC61A1	spearman correlation	two-sided	593	0.11	[0.03 0.19]	0.006	0.03
ACADVL	spearman correlation	two-sided	593	0.15	[0.07 0.22]	0.0003	0.005
SLC6A6	spearman correlation	two-sided	593	-0.16	[-0.24 -0.08]	<0.0001	0.002
PRMT1	spearman correlation	two-sided	593	0.15	[0.07 0.23]	0.0002	0.005
LIMA1	spearman correlation	two-sided	593	0.11	[0.03 0.19]	0.005	0.03
SURF4	spearman correlation	two-sided	593	0.13	[0.05 0.21]	0.002	0.02
KDELR1	spearman correlation	two-sided	593	0.12	[0.04 0.2 ]	0.002	0.02
SPARCL1	spearman correlation	two-sided	593	-0.16	[-0.24 -0.08]	<0.0001	0.002
MGP	spearman correlation	two-sided	593	-0.19	[-0.27 -0.11]	<0.0001	0.0002
TMEM63A	spearman correlation	two-sided	593	-0.12	[-0.2 -0.04]	0.005	0.03
BCL2L1	spearman correlation	two-sided	593	-0.11	[-0.19 -0.03]	0.009	0.045
CANT1	spearman correlation	two-sided	593	0.11	[0.03 0.18]	0.01	0.049
GPNMB	spearman correlation	two-sided	593	-0.11	[-0.19 -0.03]	0.009	0.046
CLU	spearman correlation	two-sided	593	-0.13	[-0.21 -0.05]	0.001	0.01
SFRS3	spearman correlation	two-sided	593	0.14	[0.06 0.22]	0.0005	0.006
AQP1	spearman correlation	two-sided	593	-0.19	[-0.26 -0.11]	<0.0001	0.0004
HK2	spearman correlation	two-sided	593	0.15	[0.07 0.23]	0.0003	0.005
MMP12	spearman correlation	two-sided	593	0.11	[0.03 0.19]	0.006	0.04
SSR2	spearman correlation	two-sided	593	0.11	[0.03 0.19]	0.007	0.04
RPN1	spearman correlation	two-sided	593	0.12	[0.04 0.2 ]	0.003	0.02
COX8A	spearman correlation	two-sided	593	0.15	[0.07 0.23]	0.0002	0.004
L1TD1	spearman correlation	two-sided	593	0.17	[0.09 0.25]	<0.0001	0.001
MLLT6	spearman correlation	two-sided	593	-0.12	[-0.2 -0.04]	0.002	0.02
NCOR2	spearman correlation	two-sided	593	-0.11	[-0.18 -0.03]	0.01	0.0496
PTK7	spearman correlation	two-sided	593	-0.11	[-0.19 -0.03]	0.008	0.04
MMP3	spearman correlation	two-sided	593	0.22	[0.14 0.29]	<0.0001	<0.0001
PDGFRB	spearman correlation	two-sided	593	-0.12	[-0.2 -0.04]	0.003	0.02
PTBP1	spearman correlation	two-sided	593	0.11	[0.03 0.19]	0.006	0.04
DPYSL3	spearman correlation	two-sided	593	-0.15	[-0.23 -0.07]	0.0003	0.005
SHMT2	spearman correlation	two-sided	593	0.23	[0.16 0.31]	<0.0001	<0.0001
STAU1	spearman correlation	two-sided	593	-0.12	[-0.2 -0.04]	0.002	0.02
IL1B	spearman correlation	two-sided	593	0.27	[0.2 0.35]	<0.0001	<0.0001
HSD17B12	spearman correlation	two-sided	593	0.11	[0.03 0.19]	0.01	0.049
CCL20	spearman correlation	two-sided	593	0.12	[0.04 0.2 ]	0.003	0.02
SFRP4	spearman correlation	two-sided	593	-0.21	[-0.28 -0.13]	<0.0001	<0.0001
CDC42EP1	spearman correlation	two-sided	593	0.13	[0.05 0.21]	0.002	0.02
RARA	spearman correlation	two-sided	593	-0.12	[-0.2 -0.04]	0.003	0.02
SYNM	spearman correlation	two-sided	593	-0.13	[-0.21 -0.05]	0.001	0.01
EIF3I	spearman correlation	two-sided	593	0.12	[0.04 0.2 ]	0.004	0.03
TUBA4A	spearman correlation	two-sided	593	0.12	[0.04 0.2 ]	0.003	0.02
PRDX3	spearman correlation	two-sided	593	0.12	[0.04 0.2 ]	0.003	0.03
TM9SF4	spearman correlation	two-sided	593	-0.15	[-0.23 -0.07]	0.0002	0.004
TMEM106C	spearman correlation	two-sided	593	0.12	[0.04 0.19]	0.005	0.03
IGF2R	spearman correlation	two-sided	593	-0.12	[-0.2 -0.04]	0.003	0.03
PGAM1	spearman correlation	two-sided	593	0.21	[0.13 0.28]	<0.0001	<0.0001
NCLN	spearman correlation	two-sided	593	0.12	[0.04 0.2 ]	0.003	0.02
EMILIN1	spearman correlation	two-sided	593	-0.12	[-0.2 -0.04]	0.003	0.02
ATP5C1	spearman correlation	two-sided	593	0.11	[0.03 0.19]	0.007	0.04
LAMP2	spearman correlation	two-sided	593	-0.12	[-0.2 -0.04]	0.004	0.03
COX6A1	spearman correlation	two-sided	593	0.17	[0.09 0.25]	<0.0001	0.001
ATP6V0B	spearman correlation	two-sided	593	0.14	[0.06 0.22]	0.0008	0.01
TCP1	spearman correlation	two-sided	593	0.12	[0.04 0.2 ]	0.003	0.02
ATP5F1	spearman correlation	two-sided	593	0.11	[0.03 0.19]	0.008	0.04
VAV3	spearman correlation	two-sided	593	-0.16	[-0.24 -0.08]	<0.0001	0.002
WDR34	spearman correlation	two-sided	593	0.11	[0.03 0.19]	0.007	0.04
LRRC59	spearman correlation	two-sided	593	0.17	[0.09 0.24]	<0.0001	0.002
CTSK	spearman correlation	two-sided	593	-0.12	[-0.2 -0.04]	0.003	0.02
AKAP1	spearman correlation	two-sided	593	-0.11	[-0.19 -0.03]	0.008	0.04
COL11A1	spearman correlation	two-sided	593	-0.12	[-0.2 -0.04]	0.004	0.03
UBE2D3	spearman correlation	two-sided	593	0.11	[0.03 0.19]	0.008	0.04
PYCR1	spearman correlation	two-sided	593	0.13	[0.05 0.21]	0.002	0.02
PA2G4	spearman correlation	two-sided	593	0.14	[0.06 0.22]	0.0007	0.009
CKAP4	spearman correlation	two-sided	593	0.11	[0.03 0.19]	0.006	0.04
C1QBP	spearman correlation	two-sided	593	0.2	[0.12 0.27]	<0.0001	0.0002
PRR15	spearman correlation	two-sided	593	-0.14	[-0.22 -0.06]	0.0006	0.007
CAPZA1	spearman correlation	two-sided	593	0.12	[0.03 0.19]	0.005	0.03
PPP1R12B	spearman correlation	two-sided	593	-0.13	[-0.21 -0.05]	0.002	0.02
DUOXA2	spearman correlation	two-sided	593	0.13	[0.05 0.21]	0.001	0.01
MLF2	spearman correlation	two-sided	593	0.13	[0.05 0.21]	0.001	0.01
MRPS35	spearman correlation	two-sided	593	0.22	[0.14 0.3 ]	<0.0001	<0.0001
LAPTM4A	spearman correlation	two-sided	593	-0.13	[-0.21 -0.05]	0.002	0.02
RGS5	spearman correlation	two-sided	593	-0.11	[-0.19 -0.03]	0.008	0.04
NUPR1	spearman correlation	two-sided	593	-0.18	[-0.25 -0.1 ]	<0.0001	0.0008
RPL22L1	spearman correlation	two-sided	593	0.14	[0.06 0.22]	0.0008	0.009
CTDSP2	spearman correlation	two-sided	593	-0.11	[-0.19 -0.03]	0.007	0.04
SEMA4B	spearman correlation	two-sided	593	0.13	[0.05 0.21]	0.002	0.02
GTF2IP1	spearman correlation	two-sided	593	-0.12	[-0.2 -0.04]	0.004	0.03
TGFBR2	spearman correlation	two-sided	593	-0.16	[-0.24 -0.08]	<0.0001	0.002
PRKAR1A	spearman correlation	two-sided	593	-0.11	[-0.19 -0.03]	0.008	0.04
ANXA6	spearman correlation	two-sided	593	-0.11	[-0.19 -0.03]	0.007	0.04
C19orf48	spearman correlation	two-sided	593	0.17	[0.09 0.25]	<0.0001	0.001
NPTX2	spearman correlation	two-sided	593	-0.11	[-0.19 -0.03]	0.006	0.04
TAX1BP1	spearman correlation	two-sided	593	-0.13	[-0.21 -0.05]	0.001	0.01
MED1	spearman correlation	two-sided	593	-0.11	[-0.19 -0.03]	0.009	0.048
CCDC80	spearman correlation	two-sided	593	-0.18	[-0.25 -0.1 ]	<0.0001	0.0008
ISLR	spearman correlation	two-sided	593	-0.17	[-0.25 -0.09]	<0.0001	0.001
ETHE1	spearman correlation	two-sided	593	0.17	[0.09 0.25]	<0.0001	0.001
SSR1	spearman correlation	two-sided	593	0.14	[0.06 0.22]	0.0006	0.007
DYNLRB1	spearman correlation	two-sided	593	-0.13	[-0.21 -0.05]	0.002	0.02
SSR3	spearman correlation	two-sided	593	0.16	[0.08 0.23]	0.0001	0.003
NUP210	spearman correlation	two-sided	593	0.12	[0.04 0.2 ]	0.004	0.03
NNAT	spearman correlation	two-sided	593	-0.15	[-0.22 -0.07]	0.0004	0.006
CD320	spearman correlation	two-sided	593	0.13	[0.05 0.21]	0.001	0.01
PLIN4	spearman correlation	two-sided	593	-0.11	[-0.19 -0.03]	0.009	0.046
FOXM1	spearman correlation	two-sided	593	0.17	[0.09 0.24]	<0.0001	0.001
MAP4	spearman correlation	two-sided	593	-0.14	[-0.22 -0.06]	0.0005	0.007
PXN	spearman correlation	two-sided	593	0.12	[0.04 0.2 ]	0.004	0.03
PSMB1	spearman correlation	two-sided	593	0.12	[0.04 0.2 ]	0.002	0.02
ECHS1	spearman correlation	two-sided	593	0.13	[0.05 0.21]	0.001	0.01
PFKP	spearman correlation	two-sided	593	0.15	[0.08 0.23]	0.0002	0.003
CCT2	spearman correlation	two-sided	593	0.15	[0.07 0.23]	0.0003	0.005
POLR2L	spearman correlation	two-sided	593	0.15	[0.07 0.23]	0.0002	0.004
TALDO1	spearman correlation	two-sided	593	0.11	[0.03 0.19]	0.006	0.03
ITFG3	spearman correlation	two-sided	593	-0.15	[-0.22 -0.07]	0.0004	0.006
CIB1	spearman correlation	two-sided	593	0.13	[0.05 0.21]	0.001	0.01
KLF4	spearman correlation	two-sided	593	0.14	[0.06 0.22]	0.0005	0.006
TNS3	spearman correlation	two-sided	593	-0.17	[-0.25 -0.09]	<0.0001	0.001
LFNG	spearman correlation	two-sided	593	-0.13	[-0.21 -0.05]	0.002	0.02
MRPL12	spearman correlation	two-sided	593	0.14	[0.06 0.21]	0.0009	0.01
CES1	spearman correlation	two-sided	593	-0.16	[-0.24 -0.08]	<0.0001	0.002
SF3B5	spearman correlation	two-sided	593	0.15	[0.07 0.23]	0.0002	0.004
ACSS1	spearman correlation	two-sided	593	-0.11	[-0.19 -0.03]	0.008	0.04
SERINC3	spearman correlation	two-sided	593	-0.15	[-0.23 -0.07]	0.0002	0.004
MACF1	spearman correlation	two-sided	593	-0.14	[-0.22 -0.06]	0.0005	0.007
AMACR	spearman correlation	two-sided	593	-0.13	[-0.21 -0.05]	0.002	0.02
FNDC1	spearman correlation	two-sided	593	-0.14	[-0.22 -0.07]	0.0004	0.006
FKBP9	spearman correlation	two-sided	593	-0.14	[-0.22 -0.06]	0.0006	0.008
SAA1	spearman correlation	two-sided	593	0.14	[0.06 0.22]	0.0007	0.009
CS	spearman correlation	two-sided	593	0.18	[0.1 0.26]	<0.0001	0.0006
MRAS	spearman correlation	two-sided	593	-0.11	[-0.19 -0.03]	0.007	0.04
HN1	spearman correlation	two-sided	593	0.11	[0.03 0.19]	0.007	0.04
GALNT7	spearman correlation	two-sided	593	0.11	[0.03 0.19]	0.007	0.04
SQRDL	spearman correlation	two-sided	593	0.12	[0.04 0.2 ]	0.002	0.02
CD177	spearman correlation	two-sided	593	0.12	[0.04 0.2 ]	0.003	0.02
MAT2A	spearman correlation	two-sided	593	0.12	[0.04 0.2 ]	0.004	0.03
PPP1CC	spearman correlation	two-sided	593	0.15	[0.07 0.23]	0.0002	0.005
CSF3	spearman correlation	two-sided	593	0.27	[0.19 0.34]	<0.0001	<0.0001
ANKH	spearman correlation	two-sided	593	-0.16	[-0.23 -0.08]	0.0001	0.003
TIMM13	spearman correlation	two-sided	593	0.13	[0.05 0.2 ]	0.002	0.02
AURKAIP1	spearman correlation	two-sided	593	0.13	[0.05 0.21]	0.001	0.01
SPCS3	spearman correlation	two-sided	593	0.12	[0.04 0.2 ]	0.003	0.03
RUVBL2	spearman correlation	two-sided	593	0.12	[0.04 0.2 ]	0.003	0.02
SLC39A8	spearman correlation	two-sided	593	0.12	[0.04 0.2 ]	0.004	0.03
STOML2	spearman correlation	two-sided	593	0.14	[0.06 0.22]	0.0005	0.006
TSPAN14	spearman correlation	two-sided	593	0.13	[0.05 0.21]	0.002	0.02
COX7A2	spearman correlation	two-sided	593	0.13	[0.05 0.21]	0.001	0.01
SRCAP	spearman correlation	two-sided	593	-0.12	[-0.2 -0.04]	0.004	0.03
COX5A	spearman correlation	two-sided	593	0.14	[0.06 0.21]	0.0009	0.01
SFRS2	spearman correlation	two-sided	593	0.16	[0.08 0.23]	0.0001	0.003
TMPO	spearman correlation	two-sided	593	0.11	[0.03 0.19]	0.009	0.046
IARS	spearman correlation	two-sided	593	0.11	[0.03 0.19]	0.009	0.046
SIVA1	spearman correlation	two-sided	593	0.11	[0.03 0.19]	0.006	0.03
SERP1	spearman correlation	two-sided	593	0.12	[0.04 0.2 ]	0.003	0.02
LTBP2	spearman correlation	two-sided	593	-0.14	[-0.22 -0.06]	0.0006	0.008
NDUFA9	spearman correlation	two-sided	593	0.22	[0.14 0.3 ]	<0.0001	<0.0001
C20orf108	spearman correlation	two-sided	593	-0.13	[-0.21 -0.05]	0.001	0.01
SYNE2	spearman correlation	two-sided	593	-0.13	[-0.21 -0.05]	0.001	0.01
KPNA2	spearman correlation	two-sided	593	0.13	[0.05 0.21]	0.002	0.02
AHNAK2	spearman correlation	two-sided	593	-0.13	[-0.21 -0.05]	0.002	0.02
ITGB5	spearman correlation	two-sided	593	-0.17	[-0.25 -0.09]	<0.0001	0.001
SCAP	spearman correlation	two-sided	593	-0.12	[-0.2 -0.04]	0.003	0.02
QPRT	spearman correlation	two-sided	593	-0.11	[-0.19 -0.03]	0.008	0.04
SERPINF1	spearman correlation	two-sided	593	-0.14	[-0.22 -0.06]	0.0005	0.007
ERO1L	spearman correlation	two-sided	593	0.12	[0.04 0.2 ]	0.003	0.03
PKP2	spearman correlation	two-sided	593	0.16	[0.08 0.24]	<0.0001	0.002
DDX27	spearman correlation	two-sided	593	-0.15	[-0.23 -0.07]	0.0002	0.003
SOCS3	spearman correlation	two-sided	593	0.15	[0.07 0.22]	0.0003	0.005
RRM2	spearman correlation	two-sided	593	0.19	[0.11 0.26]	<0.0001	0.0004
FBLN2	spearman correlation	two-sided	593	-0.14	[-0.22 -0.06]	0.0004	0.006
MFAP4	spearman correlation	two-sided	593	-0.19	[-0.27 -0.11]	<0.0001	0.0002
ECT2	spearman correlation	two-sided	593	0.13	[0.05 0.21]	0.001	0.01
YAP1	spearman correlation	two-sided	593	-0.12	[-0.2 -0.04]	0.003	0.02
SEPHS2	spearman correlation	two-sided	593	-0.12	[-0.2 -0.04]	0.004	0.03
MRPS34	spearman correlation	two-sided	593	0.11	[0.03 0.19]	0.008	0.04
CUX1	spearman correlation	two-sided	593	-0.15	[-0.22 -0.07]	0.0004	0.006
ERRFI1	spearman correlation	two-sided	593	0.12	[0.04 0.2 ]	0.002	0.02
COPZ1	spearman correlation	two-sided	593	0.16	[0.08 0.23]	0.0001	0.003
NBR1	spearman correlation	two-sided	593	-0.15	[-0.23 -0.07]	0.0002	0.004
DST	spearman correlation	two-sided	593	-0.12	[-0.2 -0.04]	0.004	0.03
ERP29	spearman correlation	two-sided	593	0.14	[0.06 0.22]	0.0005	0.006
LSM4	spearman correlation	two-sided	593	0.11	[0.03 0.18]	0.01	0.0499
ERN2	spearman correlation	two-sided	593	0.11	[0.03 0.19]	0.008	0.04
PSMD8	spearman correlation	two-sided	593	0.15	[0.07 0.23]	0.0003	0.005
SORBS1	spearman correlation	two-sided	593	-0.16	[-0.24 -0.08]	<0.0001	0.002
COL16A1	spearman correlation	two-sided	593	-0.11	[-0.19 -0.03]	0.008	0.04
COMP	spearman correlation	two-sided	593	-0.15	[-0.23 -0.07]	0.0002	0.003
COL14A1	spearman correlation	two-sided	593	-0.17	[-0.25 -0.1 ]	<0.0001	0.001
C14orf129	spearman correlation	two-sided	593	0.15	[0.08 0.23]	0.0002	0.003
LTBP1	spearman correlation	two-sided	593	-0.19	[-0.26 -0.11]	<0.0001	0.0004
AMD1	spearman correlation	two-sided	593	0.15	[0.07 0.23]	0.0002	0.003
NRARP	spearman correlation	two-sided	593	0.12	[0.04 0.2 ]	0.003	0.02
PAPSS2	spearman correlation	two-sided	593	0.12	[0.04 0.19]	0.005	0.03
CLDN12	spearman correlation	two-sided	593	0.13	[0.05 0.21]	0.001	0.01
EPB41L1	spearman correlation	two-sided	593	-0.22	[-0.29 -0.14]	<0.0001	<0.0001
FARP1	spearman correlation	two-sided	593	-0.12	[-0.2 -0.04]	0.002	0.02
2007-09-01	spearman correlation	two-sided	593	-0.13	[-0.2 -0.05]	0.002	0.02
SYNPO	spearman correlation	two-sided	593	-0.14	[-0.22 -0.06]	0.0006	0.008
LMOD1	spearman correlation	two-sided	593	-0.17	[-0.25 -0.09]	<0.0001	0.001
HTRA3	spearman correlation	two-sided	593	-0.15	[-0.22 -0.07]	0.0004	0.006
UBE2N	spearman correlation	two-sided	593	0.19	[0.12 0.27]	<0.0001	0.0002
PEA15	spearman correlation	two-sided	593	-0.12	[-0.2 -0.04]	0.003	0.02
ELN	spearman correlation	two-sided	593	-0.18	[-0.26 -0.1 ]	<0.0001	0.0008
CNIH	spearman correlation	two-sided	593	0.14	[0.06 0.22]	0.0008	0.01
ATP2B4	spearman correlation	two-sided	593	-0.13	[-0.21 -0.05]	0.001	0.01
SUCLG1	spearman correlation	two-sided	593	0.11	[0.03 0.19]	0.005	0.03
DAB2	spearman correlation	two-sided	593	-0.16	[-0.24 -0.08]	<0.0001	0.002
C20orf43	spearman correlation	two-sided	593	-0.14	[-0.22 -0.06]	0.0006	0.008
LY75	spearman correlation	two-sided	593	-0.13	[-0.2 -0.05]	0.002	0.02
PTPLAD1	spearman correlation	two-sided	593	0.11	[0.03 0.19]	0.01	0.048
PSMA4	spearman correlation	two-sided	593	0.12	[0.04 0.2 ]	0.004	0.03
VAT1	spearman correlation	two-sided	593	-0.13	[-0.21 -0.05]	0.002	0.02
ELF1	spearman correlation	two-sided	593	-0.14	[-0.22 -0.06]	0.0006	0.008
C19orf10	spearman correlation	two-sided	593	0.21	[0.14 0.29]	<0.0001	<0.0001
FGGY	spearman correlation	two-sided	593	-0.13	[-0.2 -0.05]	0.002	0.02
HMGN1	spearman correlation	two-sided	593	0.15	[0.07 0.23]	0.0003	0.005
NDUFS7	spearman correlation	two-sided	593	0.11	[0.03 0.19]	0.009	0.048
IDS	spearman correlation	two-sided	593	-0.16	[-0.24 -0.08]	<0.0001	0.002
PSMA6	spearman correlation	two-sided	593	0.12	[0.04 0.2 ]	0.004	0.03
GPSM2	spearman correlation	two-sided	593	-0.12	[-0.2 -0.04]	0.004	0.03
NCOA6	spearman correlation	two-sided	593	-0.17	[-0.25 -0.09]	<0.0001	0.001
WNT11	spearman correlation	two-sided	593	-0.14	[-0.22 -0.06]	0.0006	0.008
PIM3	spearman correlation	two-sided	593	0.22	[0.14 0.29]	<0.0001	<0.0001
PLIN3	spearman correlation	two-sided	593	0.11	[0.03 0.19]	0.006	0.03
SMARCE1	spearman correlation	two-sided	593	-0.12	[-0.2 -0.04]	0.003	0.02
RERE	spearman correlation	two-sided	593	-0.15	[-0.23 -0.07]	0.0003	0.005
MIDN	spearman correlation	two-sided	593	0.11	[0.03 0.19]	0.005	0.03
OSTC	spearman correlation	two-sided	593	0.12	[0.04 0.2 ]	0.004	0.03
AK2	spearman correlation	two-sided	593	0.14	[0.06 0.22]	0.0005	0.007
SEMA3C	spearman correlation	two-sided	593	-0.19	[-0.27 -0.11]	<0.0001	0.0003
C12orf57	spearman correlation	two-sided	593	0.11	[0.03 0.19]	0.006	0.04
LAMA4	spearman correlation	two-sided	593	-0.15	[-0.22 -0.07]	0.0004	0.006
ESYT2	spearman correlation	two-sided	593	-0.12	[-0.2 -0.04]	0.005	0.03
MRPL4	spearman correlation	two-sided	593	0.13	[0.05 0.21]	0.002	0.02
PSMD13	spearman correlation	two-sided	593	0.11	[0.03 0.19]	0.008	0.04
PSAT1	spearman correlation	two-sided	593	0.15	[0.07 0.22]	0.0004	0.006
SIAE	spearman correlation	two-sided	593	0.12	[0.04 0.2 ]	0.003	0.02
CRTAP	spearman correlation	two-sided	593	-0.14	[-0.22 -0.06]	0.0005	0.007
MT1E	spearman correlation	two-sided	593	0.11	[0.03 0.18]	0.01	0.0495
DDAH2	spearman correlation	two-sided	593	-0.11	[-0.19 -0.03]	0.008	0.04
ARFGEF1	spearman correlation	two-sided	593	-0.12	[-0.19 -0.04]	0.005	0.03
CLDN15	spearman correlation	two-sided	593	-0.11	[-0.19 -0.03]	0.008	0.04
NCAPD2	spearman correlation	two-sided	593	0.11	[0.03 0.19]	0.009	0.046
SERINC1	spearman correlation	two-sided	593	-0.12	[-0.2 -0.04]	0.004	0.03
CDH11	spearman correlation	two-sided	593	-0.13	[-0.21 -0.05]	0.001	0.01
MLLT4	spearman correlation	two-sided	593	-0.11	[-0.19 -0.03]	0.005	0.03
TK1	spearman correlation	two-sided	593	0.17	[0.1 0.25]	<0.0001	0.001
DAD1	spearman correlation	two-sided	593	0.12	[0.04 0.2 ]	0.003	0.02
MKRN1	spearman correlation	two-sided	593	-0.13	[-0.21 -0.05]	0.002	0.02
AKAP12	spearman correlation	two-sided	593	-0.12	[-0.2 -0.04]	0.003	0.02
ETNK1	spearman correlation	two-sided	593	0.12	[0.04 0.2 ]	0.004	0.03
COL10A1	spearman correlation	two-sided	593	-0.11	[-0.19 -0.03]	0.007	0.04
CDC42EP5	spearman correlation	two-sided	593	0.15	[0.07 0.22]	0.0003	0.005
SORT1	spearman correlation	two-sided	593	-0.11	[-0.19 -0.03]	0.009	0.045
C7orf42	spearman correlation	two-sided	593	-0.13	[-0.21 -0.05]	0.001	0.01
UQCR11	spearman correlation	two-sided	593	0.11	[0.03 0.19]	0.009	0.048
FOXQ1	spearman correlation	two-sided	593	-0.14	[-0.21 -0.06]	0.0009	0.01
PTGES2	spearman correlation	two-sided	593	0.13	[0.05 0.21]	0.001	0.01
SCRN1	spearman correlation	two-sided	593	-0.12	[-0.2 -0.04]	0.004	0.03
SVIL	spearman correlation	two-sided	593	-0.16	[-0.24 -0.08]	<0.0001	0.002
PLCG1	spearman correlation	two-sided	593	-0.15	[-0.23 -0.07]	0.0003	0.005
CDCP1	spearman correlation	two-sided	593	0.15	[0.07 0.23]	0.0002	0.004
CDC6	spearman correlation	two-sided	593	0.13	[0.05 0.21]	0.002	0.02
EGLN3	spearman correlation	two-sided	593	0.13	[0.05 0.21]	0.001	0.01
UBR5	spearman correlation	two-sided	593	-0.15	[-0.22 -0.07]	0.0004	0.006
ADNP	spearman correlation	two-sided	593	-0.12	[-0.19 -0.04]	0.005	0.03
KIF3B	spearman correlation	two-sided	593	-0.12	[-0.2 -0.04]	0.004	0.03
CXCL3	spearman correlation	two-sided	593	0.24	[0.16 0.32]	<0.0001	<0.0001
TXNRD1	spearman correlation	two-sided	593	0.11	[0.03 0.19]	0.007	0.04
CASK	spearman correlation	two-sided	593	-0.13	[-0.21 -0.05]	0.002	0.02
PLAUR	spearman correlation	two-sided	593	0.11	[0.03 0.19]	0.007	0.04
SEPN1	spearman correlation	two-sided	593	-0.11	[-0.19 -0.03]	0.005	0.03
LTBP3	spearman correlation	two-sided	593	-0.16	[-0.24 -0.08]	<0.0001	0.002
TNFRSF10B	spearman correlation	two-sided	593	0.13	[0.05 0.21]	0.001	0.01
MCCC2	spearman correlation	two-sided	593	0.12	[0.04 0.19]	0.005	0.03
PSMA5	spearman correlation	two-sided	593	0.12	[0.04 0.2 ]	0.003	0.02
FAM198B	spearman correlation	two-sided	593	-0.14	[-0.22 -0.06]	0.0006	0.007
GNG5	spearman correlation	two-sided	593	0.13	[0.05 0.21]	0.001	0.01
TLE2	spearman correlation	two-sided	593	-0.11	[-0.19 -0.03]	0.005	0.03
API5	spearman correlation	two-sided	593	0.11	[0.03 0.19]	0.009	0.048
GNPNAT1	spearman correlation	two-sided	593	0.17	[0.09 0.25]	<0.0001	0.001
SEMA5A	spearman correlation	two-sided	593	-0.17	[-0.25 -0.09]	<0.0001	0.001
CX3CL1	spearman correlation	two-sided	593	-0.12	[-0.2 -0.04]	0.004	0.03
NDUFS8	spearman correlation	two-sided	593	0.11	[0.03 0.19]	0.009	0.048
MACC1	spearman correlation	two-sided	593	-0.13	[-0.21 -0.05]	0.001	0.01
TFCP2L1	spearman correlation	two-sided	593	-0.11	[-0.19 -0.03]	0.008	0.04
PSMA1	spearman correlation	two-sided	593	0.12	[0.04 0.2 ]	0.004	0.03
LPCAT1	spearman correlation	two-sided	593	0.11	[0.03 0.19]	0.006	0.03
TPR	spearman correlation	two-sided	593	-0.13	[-0.21 -0.05]	0.001	0.01
H2AFX	spearman correlation	two-sided	593	0.15	[0.07 0.23]	0.0002	0.004
SUN2	spearman correlation	two-sided	593	-0.12	[-0.2 -0.04]	0.004	0.03
DCTN1	spearman correlation	two-sided	593	-0.15	[-0.22 -0.07]	0.0003	0.005
DIDO1	spearman correlation	two-sided	593	-0.13	[-0.21 -0.05]	0.002	0.01
SBNO2	spearman correlation	two-sided	593	0.13	[0.05 0.21]	0.001	0.01
PRKACB	spearman correlation	two-sided	593	-0.11	[-0.19 -0.03]	0.007	0.04
MRPS2	spearman correlation	two-sided	593	0.17	[0.09 0.24]	<0.0001	0.001
CDK1	spearman correlation	two-sided	593	0.16	[0.09 0.24]	<0.0001	0.002
RAD23B	spearman correlation	two-sided	593	0.12	[0.04 0.19]	0.005	0.03
EIF5AL1	spearman correlation	two-sided	593	0.21	[0.13 0.28]	<0.0001	<0.0001
TSPAN15	spearman correlation	two-sided	593	0.13	[0.05 0.2 ]	0.002	0.02
PNMA5	spearman correlation	two-sided	593	-0.13	[-0.21 -0.05]	0.002	0.01
MAP4K4	spearman correlation	two-sided	593	-0.14	[-0.22 -0.06]	0.0005	0.006
THRA	spearman correlation	two-sided	593	-0.12	[-0.2 -0.04]	0.003	0.02
GADD45GIP1	spearman correlation	two-sided	593	0.11	[0.03 0.18]	0.01	0.0497
KIAA1967	spearman correlation	two-sided	593	0.11	[0.03 0.18]	0.01	0.049
CPE	spearman correlation	two-sided	593	-0.15	[-0.23 -0.07]	0.0003	0.005
RAP1B	spearman correlation	two-sided	593	0.15	[0.07 0.22]	0.0004	0.006
ARHGEF12	spearman correlation	two-sided	593	-0.11	[-0.19 -0.03]	0.009	0.046
MXRA8	spearman correlation	two-sided	593	-0.13	[-0.21 -0.05]	0.002	0.02
AOC3	spearman correlation	two-sided	593	-0.14	[-0.22 -0.06]	0.0006	0.007
UQCRFS1	spearman correlation	two-sided	593	0.13	[0.05 0.21]	0.001	0.01
G3BP1	spearman correlation	two-sided	593	0.11	[0.03 0.19]	0.006	0.03
DBNDD2	spearman correlation	two-sided	593	-0.13	[-0.2 -0.05]	0.002	0.02
MRPS12	spearman correlation	two-sided	593	0.15	[0.07 0.23]	0.0003	0.005
MTHFD2	spearman correlation	two-sided	593	0.17	[0.09 0.25]	<0.0001	0.001
TC2N	spearman correlation	two-sided	593	0.15	[0.07 0.23]	0.0003	0.005
NFIX	spearman correlation	two-sided	593	-0.16	[-0.24 -0.09]	<0.0001	0.002
ENTPD8	spearman correlation	two-sided	593	0.12	[0.04 0.2 ]	0.002	0.02
SMG7	spearman correlation	two-sided	593	-0.11	[-0.19 -0.03]	0.006	0.04
IFRD2	spearman correlation	two-sided	593	0.11	[0.03 0.19]	0.008	0.04
CCNB1	spearman correlation	two-sided	593	0.18	[0.1 0.26]	<0.0001	0.0006
MCM5	spearman correlation	two-sided	593	0.12	[0.04 0.2 ]	0.003	0.02
SEC13	spearman correlation	two-sided	593	0.14	[0.07 0.22]	0.0004	0.006
HES1	spearman correlation	two-sided	593	0.12	[0.04 0.2 ]	0.004	0.03
MDM2	spearman correlation	two-sided	593	0.15	[0.08 0.23]	0.0002	0.003
CLCN7	spearman correlation	two-sided	593	-0.14	[-0.22 -0.06]	0.0004	0.006
ETFA	spearman correlation	two-sided	593	0.14	[0.06 0.22]	0.0007	0.008
PNP	spearman correlation	two-sided	593	0.17	[0.09 0.24]	<0.0001	0.002
EFEMP1	spearman correlation	two-sided	593	-0.17	[-0.24 -0.09]	<0.0001	0.002
ZC3H12A	spearman correlation	two-sided	593	0.23	[0.15 0.3 ]	<0.0001	<0.0001
F2RL1	spearman correlation	two-sided	593	0.11	[0.03 0.19]	0.009	0.046
TMEM165	spearman correlation	two-sided	593	0.11	[0.03 0.19]	0.005	0.03
WHSC1	spearman correlation	two-sided	593	0.12	[0.04 0.2 ]	0.004	0.03
FILIP1L	spearman correlation	two-sided	593	-0.13	[-0.21 -0.05]	0.002	0.02
C20orf11	spearman correlation	two-sided	593	-0.12	[-0.19 -0.04]	0.005	0.03
BLCAP	spearman correlation	two-sided	593	-0.15	[-0.23 -0.07]	0.0003	0.005
PBXIP1	spearman correlation	two-sided	593	-0.17	[-0.25 -0.09]	<0.0001	0.001
SAMD5	spearman correlation	two-sided	593	0.12	[0.04 0.2 ]	0.004	0.03
SBDS	spearman correlation	two-sided	593	-0.12	[-0.2 -0.04]	0.004	0.03
SPCS1	spearman correlation	two-sided	593	0.12	[0.04 0.19]	0.005	0.03
FLOT2	spearman correlation	two-sided	593	-0.13	[-0.21 -0.05]	0.002	0.02
OPTN	spearman correlation	two-sided	593	-0.11	[-0.19 -0.03]	0.008	0.04
ERH	spearman correlation	two-sided	593	0.13	[0.05 0.21]	0.002	0.02
CHI3L1	spearman correlation	two-sided	593	-0.11	[-0.19 -0.03]	0.009	0.048
MAP2K3	spearman correlation	two-sided	593	0.13	[0.05 0.2 ]	0.002	0.02
TOMM22	spearman correlation	two-sided	593	0.14	[0.06 0.21]	0.0009	0.01
CYBRD1	spearman correlation	two-sided	593	-0.17	[-0.25 -0.09]	<0.0001	0.001
PTPRK	spearman correlation	two-sided	593	-0.2	[-0.27 -0.12]	<0.0001	0.0002
TES	spearman correlation	two-sided	593	-0.11	[-0.19 -0.03]	0.006	0.03
CDC20	spearman correlation	two-sided	593	0.2	[0.12 0.28]	<0.0001	0.0001
PTK2	spearman correlation	two-sided	593	-0.15	[-0.23 -0.07]	0.0003	0.005
TOP1MT	spearman correlation	two-sided	593	-0.11	[-0.19 -0.03]	0.006	0.04
KANK2	spearman correlation	two-sided	593	-0.15	[-0.23 -0.07]	0.0002	0.004
FOXO3	spearman correlation	two-sided	593	-0.18	[-0.25 -0.1 ]	<0.0001	0.0009
TRRAP	spearman correlation	two-sided	593	-0.13	[-0.21 -0.05]	0.001	0.01
FAM168B	spearman correlation	two-sided	593	-0.11	[-0.18 -0.03]	0.01	0.049
DEGS2	spearman correlation	two-sided	593	0.11	[0.03 0.19]	0.008	0.04
POC1B	spearman correlation	two-sided	593	0.12	[0.04 0.2 ]	0.002	0.02
CCNC	spearman correlation	two-sided	593	0.14	[0.06 0.22]	0.0007	0.009
FHL1	spearman correlation	two-sided	593	-0.16	[-0.23 -0.08]	0.0001	0.003
SPATS2L	spearman correlation	two-sided	593	-0.11	[-0.19 -0.03]	0.009	0.047
MARS	spearman correlation	two-sided	593	0.17	[0.09 0.25]	<0.0001	0.001
MANF	spearman correlation	two-sided	593	0.14	[0.06 0.21]	0.0009	0.01
PUM2	spearman correlation	two-sided	593	-0.14	[-0.22 -0.06]	0.0006	0.008
TRIO	spearman correlation	two-sided	593	-0.15	[-0.23 -0.07]	0.0002	0.004
HBA2	spearman correlation	two-sided	593	0.11	[0.03 0.19]	0.007	0.04
PSMB5	spearman correlation	two-sided	593	0.12	[0.04 0.19]	0.005	0.03
FAM108C1	spearman correlation	two-sided	593	0.11	[0.03 0.19]	0.008	0.04
MRPL37	spearman correlation	two-sided	593	0.13	[0.05 0.2 ]	0.002	0.02
ITGA11	spearman correlation	two-sided	593	-0.14	[-0.22 -0.06]	0.0007	0.008
ALDH3A2	spearman correlation	two-sided	593	0.12	[0.04 0.19]	0.005	0.03
FUT4	spearman correlation	two-sided	593	0.11	[0.03 0.19]	0.006	0.04
SPDEF	spearman correlation	two-sided	593	0.13	[0.05 0.21]	0.001	0.01
LRRC15	spearman correlation	two-sided	593	-0.13	[-0.21 -0.05]	0.001	0.01
COMMD7	spearman correlation	two-sided	593	-0.12	[-0.2 -0.04]	0.002	0.02
ALDH1A3	spearman correlation	two-sided	593	-0.19	[-0.27 -0.12]	<0.0001	0.0002
MRPS15	spearman correlation	two-sided	593	0.12	[0.04 0.2 ]	0.002	0.02
B3GNT6	spearman correlation	two-sided	593	0.16	[0.08 0.23]	0.0001	0.003
HERC2	spearman correlation	two-sided	593	-0.13	[-0.21 -0.05]	0.002	0.01
RNPEP	spearman correlation	two-sided	593	0.13	[0.05 0.21]	0.002	0.02
LBH	spearman correlation	two-sided	593	-0.14	[-0.22 -0.06]	0.0004	0.006
TSC22D3	spearman correlation	two-sided	593	-0.12	[-0.2 -0.04]	0.003	0.02
NDUFB4	spearman correlation	two-sided	593	0.12	[0.04 0.2 ]	0.004	0.03
GDPD5	spearman correlation	two-sided	593	-0.12	[-0.2 -0.04]	0.003	0.02
RALGAPB	spearman correlation	two-sided	593	-0.15	[-0.23 -0.07]	0.0003	0.005
TRABD	spearman correlation	two-sided	593	0.18	[0.1 0.26]	<0.0001	0.0006
AKAP11	spearman correlation	two-sided	593	-0.11	[-0.19 -0.03]	0.009	0.047
LIF	spearman correlation	two-sided	593	0.13	[0.05 0.21]	0.001	0.01
ASXL1	spearman correlation	two-sided	593	-0.11	[-0.19 -0.03]	0.008	0.04
DLST	spearman correlation	two-sided	593	0.13	[0.05 0.21]	0.002	0.02
RHOF	spearman correlation	two-sided	593	0.13	[0.05 0.21]	0.002	0.01
RER1	spearman correlation	two-sided	593	0.11	[0.03 0.19]	0.005	0.03
CHCHD10	spearman correlation	two-sided	593	0.17	[0.09 0.24]	<0.0001	0.001
SFRS11	spearman correlation	two-sided	593	0.11	[0.03 0.18]	0.01	0.0495
CKS2	spearman correlation	two-sided	593	0.16	[0.08 0.24]	<0.0001	0.002
ACVR1B	spearman correlation	two-sided	593	-0.11	[-0.19 -0.03]	0.009	0.046
ZC3H13	spearman correlation	two-sided	593	-0.15	[-0.23 -0.07]	0.0003	0.005
VPS24	spearman correlation	two-sided	593	-0.17	[-0.25 -0.09]	<0.0001	0.001
C19orf22	spearman correlation	two-sided	593	0.11	[0.03 0.19]	0.005	0.03
DUSP4	spearman correlation	two-sided	593	0.12	[0.04 0.2 ]	0.003	0.02
ITLN2	spearman correlation	two-sided	593	0.15	[0.07 0.23]	0.0003	0.005
NDUFA4L2	spearman correlation	two-sided	593	0.11	[0.03 0.19]	0.009	0.046
H6PD	spearman correlation	two-sided	593	-0.17	[-0.24 -0.09]	<0.0001	0.001
NACC1	spearman correlation	two-sided	593	0.13	[0.05 0.21]	0.001	0.01
ASPN	spearman correlation	two-sided	593	-0.19	[-0.27 -0.11]	<0.0001	0.0002
BCAM	spearman correlation	two-sided	593	-0.12	[-0.19 -0.03]	0.005	0.03
SUPT6H	spearman correlation	two-sided	593	-0.12	[-0.2 -0.04]	0.004	0.03
RBP1	spearman correlation	two-sided	593	-0.14	[-0.22 -0.06]	0.0007	0.009
VPS36	spearman correlation	two-sided	593	-0.11	[-0.19 -0.03]	0.01	0.048
PRELP	spearman correlation	two-sided	593	-0.21	[-0.29 -0.13]	<0.0001	<0.0001
ZNFX1	spearman correlation	two-sided	593	-0.17	[-0.25 -0.09]	<0.0001	0.001
CRIM1	spearman correlation	two-sided	593	-0.2	[-0.28 -0.12]	<0.0001	0.0001
GSR	spearman correlation	two-sided	593	0.19	[0.11 0.27]	<0.0001	0.0002
ANAPC5	spearman correlation	two-sided	593	0.14	[0.06 0.21]	0.0008	0.01
PTCH1	spearman correlation	two-sided	593	-0.12	[-0.2 -0.04]	0.003	0.02
VPS26A	spearman correlation	two-sided	593	0.11	[0.03 0.19]	0.009	0.045
VAV2	spearman correlation	two-sided	593	-0.12	[-0.2 -0.04]	0.004	0.03
HNMT	spearman correlation	two-sided	593	-0.17	[-0.24 -0.09]	<0.0001	0.002
APOC1	spearman correlation	two-sided	593	-0.12	[-0.2 -0.04]	0.003	0.03
HEG1	spearman correlation	two-sided	593	-0.12	[-0.2 -0.04]	0.004	0.03
PHLDA2	spearman correlation	two-sided	593	0.16	[0.08 0.24]	<0.0001	0.002
BCL3	spearman correlation	two-sided	593	0.18	[0.1 0.26]	<0.0001	0.0007
MRPL38	spearman correlation	two-sided	593	0.14	[0.06 0.22]	0.0008	0.009
NUDCD3	spearman correlation	two-sided	593	-0.15	[-0.23 -0.07]	0.0003	0.005
SLC35B2	spearman correlation	two-sided	593	0.11	[0.03 0.19]	0.007	0.04
DDT	spearman correlation	two-sided	593	0.14	[0.06 0.21]	0.0009	0.01
HSPA6	spearman correlation	two-sided	593	0.12	[0.04 0.2 ]	0.003	0.02
YTHDF1	spearman correlation	two-sided	593	-0.11	[-0.19 -0.03]	0.008	0.04
CAND1	spearman correlation	two-sided	593	0.12	[0.04 0.2 ]	0.003	0.02
ARAP1	spearman correlation	two-sided	593	-0.14	[-0.22 -0.06]	0.0004	0.006
SMARCA2	spearman correlation	two-sided	593	-0.12	[-0.2 -0.04]	0.003	0.02
BUB3	spearman correlation	two-sided	593	0.16	[0.08 0.24]	<0.0001	0.002
CREBBP	spearman correlation	two-sided	593	-0.16	[-0.23 -0.08]	0.0001	0.003
CHN2	spearman correlation	two-sided	593	-0.13	[-0.21 -0.05]	0.001	0.01
OSBPL2	spearman correlation	two-sided	593	-0.12	[-0.19 -0.04]	0.005	0.03
APOD	spearman correlation	two-sided	593	-0.16	[-0.24 -0.08]	<0.0001	0.002
OTUB1	spearman correlation	two-sided	593	0.11	[0.03 0.19]	0.009	0.046
SLC7A11	spearman correlation	two-sided	593	0.12	[0.04 0.19]	0.005	0.03
GOLT1B	spearman correlation	two-sided	593	0.13	[0.05 0.21]	0.002	0.02
UBL3	spearman correlation	two-sided	593	-0.15	[-0.23 -0.07]	0.0002	0.004
RASL11A	spearman correlation	two-sided	593	0.11	[0.03 0.19]	0.009	0.046
PTGS2	spearman correlation	two-sided	593	0.21	[0.13 0.29]	<0.0001	<0.0001
ABL1	spearman correlation	two-sided	593	-0.13	[-0.2 -0.05]	0.002	0.02
PSMB2	spearman correlation	two-sided	593	0.12	[0.04 0.2 ]	0.004	0.03
EP300	spearman correlation	two-sided	593	-0.11	[-0.19 -0.03]	0.006	0.04
CYP27A1	spearman correlation	two-sided	593	-0.14	[-0.22 -0.06]	0.0004	0.006
ACOT7	spearman correlation	two-sided	593	0.17	[0.09 0.25]	<0.0001	0.001
SLC2A4RG	spearman correlation	two-sided	593	-0.12	[-0.2 -0.04]	0.003	0.02
HGSNAT	spearman correlation	two-sided	593	-0.19	[-0.27 -0.11]	<0.0001	0.0003
MRPS16	spearman correlation	two-sided	593	0.13	[0.05 0.21]	0.001	0.01
TMEM183A	spearman correlation	two-sided	593	0.14	[0.06 0.22]	0.0008	0.009
TMX2	spearman correlation	two-sided	593	0.13	[0.05 0.21]	0.002	0.02
CES3	spearman correlation	two-sided	593	0.11	[0.03 0.19]	0.005	0.03
THOC4	spearman correlation	two-sided	593	0.11	[0.03 0.19]	0.007	0.04
UQCR10	spearman correlation	two-sided	593	0.11	[0.03 0.19]	0.008	0.04
VDAC2	spearman correlation	two-sided	593	0.18	[0.1 0.26]	<0.0001	0.0007
SORD	spearman correlation	two-sided	593	0.13	[0.05 0.2 ]	0.002	0.02
GLRX3	spearman correlation	two-sided	593	0.13	[0.05 0.21]	0.001	0.01
RCC1	spearman correlation	two-sided	593	0.11	[0.03 0.19]	0.008	0.04
BIRC3	spearman correlation	two-sided	593	0.12	[0.04 0.2 ]	0.005	0.03
SLC37A1	spearman correlation	two-sided	593	0.13	[0.05 0.21]	0.001	0.01
AGPAT5	spearman correlation	two-sided	593	0.16	[0.08 0.24]	<0.0001	0.002
TCF7	spearman correlation	two-sided	593	-0.12	[-0.2 -0.04]	0.005	0.03
NFKBIZ	spearman correlation	two-sided	593	0.21	[0.13 0.29]	<0.0001	<0.0001
MRPL52	spearman correlation	two-sided	593	0.15	[0.07 0.22]	0.0003	0.005
SFRS9	spearman correlation	two-sided	593	0.18	[0.1 0.26]	<0.0001	0.0006
KLK1	spearman correlation	two-sided	593	0.16	[0.08 0.24]	<0.0001	0.002
MPDU1	spearman correlation	two-sided	593	0.16	[0.08 0.24]	0.0001	0.003
MRPL14	spearman correlation	two-sided	593	0.13	[0.05 0.21]	0.002	0.02
GPC1	spearman correlation	two-sided	593	-0.15	[-0.23 -0.07]	0.0003	0.005
PDPK1	spearman correlation	two-sided	593	-0.11	[-0.19 -0.03]	0.006	0.04
RNF40	spearman correlation	two-sided	593	-0.13	[-0.21 -0.05]	0.001	0.01
PMPCA	spearman correlation	two-sided	593	0.12	[0.04 0.2 ]	0.004	0.03
CAB39L	spearman correlation	two-sided	593	-0.11	[-0.19 -0.03]	0.007	0.04
SH3PXD2B	spearman correlation	two-sided	593	-0.14	[-0.22 -0.06]	0.0004	0.006
ZKSCAN1	spearman correlation	two-sided	593	-0.14	[-0.22 -0.06]	0.0007	0.009
TACC3	spearman correlation	two-sided	593	0.13	[0.05 0.2 ]	0.002	0.02
TACC2	spearman correlation	two-sided	593	-0.12	[-0.19 -0.04]	0.005	0.03
ISOC2	spearman correlation	two-sided	593	0.15	[0.07 0.22]	0.0004	0.006
PSMB6	spearman correlation	two-sided	593	0.13	[0.05 0.2 ]	0.002	0.02
PPA2	spearman correlation	two-sided	593	0.15	[0.07 0.23]	0.0002	0.004
ZNF217	spearman correlation	two-sided	593	-0.14	[-0.22 -0.06]	0.0004	0.006
C2CD4A	spearman correlation	two-sided	593	0.15	[0.07 0.23]	0.0002	0.004
SNRPA	spearman correlation	two-sided	593	0.12	[0.04 0.19]	0.005	0.03
SRPRB	spearman correlation	two-sided	593	0.14	[0.06 0.21]	0.001	0.01
ACE	spearman correlation	two-sided	593	-0.11	[-0.19 -0.03]	0.007	0.04
SEC24D	spearman correlation	two-sided	593	0.11	[0.03 0.19]	0.006	0.03
ANP32E	spearman correlation	two-sided	593	0.12	[0.04 0.2 ]	0.004	0.03
SNX9	spearman correlation	two-sided	593	-0.12	[-0.2 -0.04]	0.005	0.03
RB1CC1	spearman correlation	two-sided	593	-0.12	[-0.2 -0.04]	0.003	0.02
RANBP1	spearman correlation	two-sided	593	0.16	[0.08 0.24]	<0.0001	0.002
SGTA	spearman correlation	two-sided	593	0.15	[0.07 0.22]	0.0004	0.006
PCDHGC3	spearman correlation	two-sided	593	-0.22	[-0.29 -0.14]	<0.0001	<0.0001
NDUFV2	spearman correlation	two-sided	593	0.12	[0.04 0.2 ]	0.002	0.02
SFRS7	spearman correlation	two-sided	593	0.16	[0.08 0.23]	0.0001	0.003
DAZAP1	spearman correlation	two-sided	593	0.14	[0.06 0.22]	0.0005	0.006
BAIAP2L2	spearman correlation	two-sided	593	0.11	[0.03 0.18]	0.01	0.0495
KIAA1217	spearman correlation	two-sided	593	-0.17	[-0.25 -0.09]	<0.0001	0.001
THOP1	spearman correlation	two-sided	593	0.15	[0.07 0.23]	0.0002	0.004
TXN2	spearman correlation	two-sided	593	0.13	[0.05 0.21]	0.001	0.01
VPS37B	spearman correlation	two-sided	593	0.15	[0.07 0.22]	0.0004	0.006
HIP1R	spearman correlation	two-sided	593	0.12	[0.04 0.2 ]	0.004	0.03
PPIL1	spearman correlation	two-sided	593	0.13	[0.05 0.21]	0.002	0.02
GIYD2	spearman correlation	two-sided	593	0.11	[0.03 0.19]	0.01	0.048
ERP44	spearman correlation	two-sided	593	0.11	[0.03 0.19]	0.008	0.04
HSPB6	spearman correlation	two-sided	593	-0.17	[-0.25 -0.09]	<0.0001	0.001
PFKFB3	spearman correlation	two-sided	593	0.15	[0.07 0.23]	0.0003	0.005
ARL1	spearman correlation	two-sided	593	0.12	[0.04 0.19]	0.005	0.03
ACADS	spearman correlation	two-sided	593	0.12	[0.04 0.2 ]	0.003	0.02
CHST5	spearman correlation	two-sided	593	0.13	[0.05 0.21]	0.001	0.01
GPR124	spearman correlation	two-sided	593	-0.11	[-0.19 -0.03]	0.005	0.03
NSMCE1	spearman correlation	two-sided	593	-0.11	[-0.19 -0.03]	0.008	0.04
ZNF358	spearman correlation	two-sided	593	-0.11	[-0.19 -0.03]	0.009	0.046
RNF6	spearman correlation	two-sided	593	-0.12	[-0.2 -0.04]	0.004	0.03
PLK1	spearman correlation	two-sided	593	0.17	[0.09 0.25]	<0.0001	0.001
LRRC32	spearman correlation	two-sided	593	-0.15	[-0.23 -0.07]	0.0002	0.004
CTNNBL1	spearman correlation	two-sided	593	-0.16	[-0.24 -0.08]	0.0001	0.003
PLEK2	spearman correlation	two-sided	593	0.11	[0.03 0.19]	0.005	0.03
SNRPF	spearman correlation	two-sided	593	0.17	[0.09 0.25]	<0.0001	0.001
CBLC	spearman correlation	two-sided	593	0.11	[0.03 0.19]	0.007	0.04
SDHB	spearman correlation	two-sided	593	0.11	[0.03 0.19]	0.008	0.04
STK4	spearman correlation	two-sided	593	-0.13	[-0.21 -0.05]	0.001	0.01
EIF2S1	spearman correlation	two-sided	593	0.14	[0.06 0.22]	0.0008	0.009
ERCC5	spearman correlation	two-sided	593	-0.11	[-0.18 -0.03]	0.01	0.049
GLRX	spearman correlation	two-sided	593	0.11	[0.03 0.19]	0.006	0.04
INTS10	spearman correlation	two-sided	593	0.14	[0.07 0.22]	0.0004	0.006
NDUFS3	spearman correlation	two-sided	593	0.12	[0.04 0.19]	0.005	0.03
VPS29	spearman correlation	two-sided	593	0.18	[0.1 0.25]	<0.0001	0.0009
MTA2	spearman correlation	two-sided	593	0.13	[0.05 0.2 ]	0.002	0.02
CLPP	spearman correlation	two-sided	593	0.15	[0.07 0.23]	0.0002	0.004
CCDC109A	spearman correlation	two-sided	593	0.17	[0.09 0.24]	<0.0001	0.002
MRPS27	spearman correlation	two-sided	593	0.15	[0.07 0.23]	0.0003	0.005
HMMR	spearman correlation	two-sided	593	0.11	[0.03 0.19]	0.007	0.04
NYNRIN	spearman correlation	two-sided	593	-0.15	[-0.23 -0.08]	0.0002	0.003
GTF2IRD1	spearman correlation	two-sided	593	-0.15	[-0.23 -0.07]	0.0002	0.003
AUTS2	spearman correlation	two-sided	593	-0.11	[-0.19 -0.03]	0.006	0.03
DOCK9	spearman correlation	two-sided	593	-0.13	[-0.21 -0.05]	0.002	0.02
SIRPA	spearman correlation	two-sided	593	-0.12	[-0.2 -0.04]	0.003	0.02
BIRC6	spearman correlation	two-sided	593	-0.16	[-0.24 -0.08]	0.0001	0.003
SDC2	spearman correlation	two-sided	593	-0.11	[-0.19 -0.03]	0.008	0.04
PIGU	spearman correlation	two-sided	593	-0.11	[-0.19 -0.03]	0.008	0.04
EXOC7	spearman correlation	two-sided	593	-0.11	[-0.19 -0.03]	0.006	0.04
C2orf24	spearman correlation	two-sided	593	-0.13	[-0.21 -0.05]	0.002	0.02
CNOT7	spearman correlation	two-sided	593	0.14	[0.06 0.21]	0.0008	0.01
RBM25	spearman correlation	two-sided	593	0.11	[0.03 0.19]	0.005	0.03
FAR1	spearman correlation	two-sided	593	0.13	[0.05 0.21]	0.002	0.01
FH	spearman correlation	two-sided	593	0.13	[0.05 0.21]	0.002	0.02
PCMTD1	spearman correlation	two-sided	593	-0.15	[-0.22 -0.07]	0.0004	0.006
UNC5B	spearman correlation	two-sided	593	-0.13	[-0.21 -0.05]	0.002	0.02
TYMS	spearman correlation	two-sided	593	0.19	[0.12 0.27]	<0.0001	0.0002
RRM1	spearman correlation	two-sided	593	0.14	[0.06 0.22]	0.0007	0.009
WDTC1	spearman correlation	two-sided	593	-0.13	[-0.21 -0.05]	0.002	0.02
C14orf147	spearman correlation	two-sided	593	0.12	[0.04 0.2 ]	0.003	0.03
MLL5	spearman correlation	two-sided	593	-0.16	[-0.24 -0.08]	<0.0001	0.002
XPNPEP2	spearman correlation	two-sided	593	-0.12	[-0.2 -0.04]	0.004	0.03
PRMT5	spearman correlation	two-sided	593	0.15	[0.07 0.22]	0.0004	0.006
TBCA	spearman correlation	two-sided	593	0.11	[0.03 0.18]	0.01	0.0495
RAB22A	spearman correlation	two-sided	593	-0.13	[-0.21 -0.05]	0.001	0.01
CFH	spearman correlation	two-sided	593	-0.15	[-0.23 -0.07]	0.0003	0.005
AKT1S1	spearman correlation	two-sided	593	0.11	[0.03 0.19]	0.009	0.048
YPEL5	spearman correlation	two-sided	593	-0.13	[-0.2 -0.05]	0.002	0.02
CCNA2	spearman correlation	two-sided	593	0.19	[0.12 0.27]	<0.0001	0.0002
F2R	spearman correlation	two-sided	593	-0.16	[-0.24 -0.08]	<0.0001	0.002
TRA2B	spearman correlation	two-sided	593	0.18	[0.1 0.26]	<0.0001	0.0006
TFG	spearman correlation	two-sided	593	0.23	[0.15 0.3 ]	<0.0001	<0.0001
UBTF	spearman correlation	two-sided	593	-0.16	[-0.24 -0.08]	<0.0001	0.002
C14orf2	spearman correlation	two-sided	593	0.17	[0.09 0.25]	<0.0001	0.001
SLC35C1	spearman correlation	two-sided	593	0.11	[0.03 0.19]	0.006	0.03
PBX1	spearman correlation	two-sided	593	-0.14	[-0.22 -0.06]	0.0006	0.008
KIAA0196	spearman correlation	two-sided	593	-0.12	[-0.2 -0.04]	0.003	0.02
UBE2S	spearman correlation	two-sided	593	0.2	[0.13 0.28]	<0.0001	<0.0001
ALDH1L1	spearman correlation	two-sided	593	0.12	[0.04 0.2 ]	0.004	0.03
CDT1	spearman correlation	two-sided	593	0.15	[0.07 0.23]	0.0003	0.005
CAPS	spearman correlation	two-sided	593	-0.14	[-0.22 -0.06]	0.0005	0.007
MRPS18A	spearman correlation	two-sided	593	0.17	[0.09 0.24]	<0.0001	0.001
CDIPT	spearman correlation	two-sided	593	-0.14	[-0.21 -0.06]	0.0009	0.01
FAM162A	spearman correlation	two-sided	593	0.12	[0.04 0.2 ]	0.004	0.03
UGT2B15	spearman correlation	two-sided	593	0.14	[0.06 0.22]	0.0006	0.008
IBTK	spearman correlation	two-sided	593	0.11	[0.03 0.19]	0.009	0.045
WSB2	spearman correlation	two-sided	593	0.14	[0.06 0.21]	0.0009	0.01
STRA13	spearman correlation	two-sided	593	0.11	[0.03 0.19]	0.008	0.04
IYD	spearman correlation	two-sided	593	-0.11	[-0.18 -0.03]	0.01	0.049
CXCL2	spearman correlation	two-sided	593	0.25	[0.17 0.33]	<0.0001	<0.0001
CEP250	spearman correlation	two-sided	593	-0.15	[-0.22 -0.07]	0.0003	0.005
PPP2CB	spearman correlation	two-sided	593	0.11	[0.03 0.19]	0.008	0.04
BMPR2	spearman correlation	two-sided	593	-0.23	[-0.3 -0.15]	<0.0001	<0.0001
SEC61B	spearman correlation	two-sided	593	0.17	[0.09 0.24]	<0.0001	0.002
SGSM3	spearman correlation	two-sided	593	0.12	[0.04 0.19]	0.005	0.03
XPNPEP1	spearman correlation	two-sided	593	0.17	[0.09 0.25]	<0.0001	0.001
AMFR	spearman correlation	two-sided	593	-0.11	[-0.19 -0.03]	0.008	0.04
CKS1B	spearman correlation	two-sided	593	0.12	[0.04 0.2 ]	0.002	0.02
SLC31A1	spearman correlation	two-sided	593	0.11	[0.03 0.19]	0.006	0.04
COMTD1	spearman correlation	two-sided	593	0.13	[0.05 0.21]	0.001	0.01
WLS	spearman correlation	two-sided	593	-0.17	[-0.25 -0.09]	<0.0001	0.001
ABAT	spearman correlation	two-sided	593	-0.18	[-0.26 -0.1 ]	<0.0001	0.0007
C9orf5	spearman correlation	two-sided	593	-0.11	[-0.19 -0.03]	0.007	0.04
ARHGAP23	spearman correlation	two-sided	593	-0.11	[-0.19 -0.03]	0.006	0.03
MED12	spearman correlation	two-sided	593	-0.13	[-0.21 -0.05]	0.002	0.01
PPP2R2A	spearman correlation	two-sided	593	0.17	[0.09 0.25]	<0.0001	0.001
PRC1	spearman correlation	two-sided	593	0.14	[0.06 0.22]	0.0006	0.007
LSM14B	spearman correlation	two-sided	593	-0.12	[-0.2 -0.04]	0.003	0.02
METAP2	spearman correlation	two-sided	593	0.15	[0.07 0.23]	0.0003	0.005
BIRC5	spearman correlation	two-sided	593	0.17	[0.1 0.25]	<0.0001	0.001
ZNF511	spearman correlation	two-sided	593	0.17	[0.09 0.24]	<0.0001	0.001
GTF3C1	spearman correlation	two-sided	593	-0.11	[-0.19 -0.03]	0.009	0.048
UBE2L3	spearman correlation	two-sided	593	0.13	[0.05 0.21]	0.001	0.01
NUSAP1	spearman correlation	two-sided	593	0.11	[0.03 0.19]	0.006	0.03
MLL3	spearman correlation	two-sided	593	-0.13	[-0.21 -0.05]	0.002	0.02
XPO7	spearman correlation	two-sided	593	0.12	[0.04 0.2 ]	0.004	0.03
TMEM43	spearman correlation	two-sided	593	-0.17	[-0.25 -0.1 ]	<0.0001	0.001
GOT1	spearman correlation	two-sided	593	0.13	[0.05 0.21]	0.001	0.01
FAM127A	spearman correlation	two-sided	593	-0.12	[-0.2 -0.04]	0.002	0.02
NF1	spearman correlation	two-sided	593	-0.12	[-0.19 -0.04]	0.005	0.03
UNG	spearman correlation	two-sided	593	0.11	[0.03 0.19]	0.007	0.04
MRPL34	spearman correlation	two-sided	593	0.13	[0.05 0.2 ]	0.002	0.02
N4BP2L2	spearman correlation	two-sided	593	-0.11	[-0.19 -0.03]	0.006	0.04
NIPBL	spearman correlation	two-sided	593	-0.13	[-0.21 -0.05]	0.001	0.01
MYCBP2	spearman correlation	two-sided	593	-0.12	[-0.19 -0.04]	0.005	0.03
PHLDB1	spearman correlation	two-sided	593	-0.12	[-0.2 -0.04]	0.003	0.02
PCYOX1	spearman correlation	two-sided	593	-0.11	[-0.19 -0.03]	0.006	0.03
POLD1	spearman correlation	two-sided	593	0.11	[0.03 0.19]	0.005	0.03
ALDH16A1	spearman correlation	two-sided	593	0.13	[0.05 0.21]	0.002	0.02
MAD2L1	spearman correlation	two-sided	593	0.14	[0.06 0.21]	0.001	0.01
SNRPN	spearman correlation	two-sided	593	-0.16	[-0.24 -0.08]	<0.0001	0.002
FLJ10357	spearman correlation	two-sided	593	-0.11	[-0.19 -0.03]	0.007	0.04
LRG1	spearman correlation	two-sided	593	0.14	[0.06 0.22]	0.0004	0.006
CECR1	spearman correlation	two-sided	593	-0.11	[-0.19 -0.03]	0.009	0.046
C20orf4	spearman correlation	two-sided	593	-0.15	[-0.22 -0.07]	0.0004	0.006
ATP6V1C1	spearman correlation	two-sided	593	-0.11	[-0.19 -0.03]	0.005	0.03
EFEMP2	spearman correlation	two-sided	593	-0.11	[-0.19 -0.03]	0.007	0.04
SEC22B	spearman correlation	two-sided	593	0.12	[0.03 0.19]	0.005	0.03
EIF4G3	spearman correlation	two-sided	593	-0.14	[-0.21 -0.06]	0.0009	0.01
IDH3A	spearman correlation	two-sided	593	0.14	[0.06 0.22]	0.0006	0.008
BECN1	spearman correlation	two-sided	593	-0.13	[-0.21 -0.05]	0.001	0.01
THBS4	spearman correlation	two-sided	593	-0.12	[-0.2 -0.04]	0.004	0.03
ATRN	spearman correlation	two-sided	593	-0.11	[-0.19 -0.03]	0.007	0.04
AXL	spearman correlation	two-sided	593	-0.11	[-0.19 -0.03]	0.007	0.04
FAM134A	spearman correlation	two-sided	593	-0.11	[-0.19 -0.03]	0.006	0.04
RMND5A	spearman correlation	two-sided	593	-0.13	[-0.21 -0.05]	0.002	0.02
PURB	spearman correlation	two-sided	593	-0.13	[-0.21 -0.05]	0.001	0.01
MRPL54	spearman correlation	two-sided	593	0.17	[0.09 0.25]	<0.0001	0.001
NUS1	spearman correlation	two-sided	593	0.12	[0.04 0.19]	0.005	0.03
CALCOCO1	spearman correlation	two-sided	593	-0.13	[-0.2 -0.05]	0.002	0.02
LSM2	spearman correlation	two-sided	593	0.17	[0.09 0.25]	<0.0001	0.001
ZNF185	spearman correlation	two-sided	593	-0.11	[-0.19 -0.03]	0.01	0.048
DOT1L	spearman correlation	two-sided	593	0.13	[0.05 0.21]	0.002	0.01
COL8A1	spearman correlation	two-sided	593	-0.12	[-0.2 -0.04]	0.003	0.02
NCK2	spearman correlation	two-sided	593	-0.19	[-0.26 -0.11]	<0.0001	0.0004
MPP1	spearman correlation	two-sided	593	-0.14	[-0.22 -0.06]	0.0004	0.006
FUT8	spearman correlation	two-sided	593	0.14	[0.06 0.22]	0.0005	0.007
AFAP1	spearman correlation	two-sided	593	-0.15	[-0.23 -0.08]	0.0002	0.003
DNAJB2	spearman correlation	two-sided	593	-0.11	[-0.19 -0.03]	0.007	0.04
MED13L	spearman correlation	two-sided	593	-0.11	[-0.19 -0.03]	0.005	0.03
RAPGEF1	spearman correlation	two-sided	593	-0.11	[-0.19 -0.03]	0.009	0.046
ARHGEF16	spearman correlation	two-sided	593	0.12	[0.04 0.2 ]	0.002	0.02
EPR1	spearman correlation	two-sided	593	0.19	[0.11 0.27]	<0.0001	0.0002
KIAA0114	spearman correlation	two-sided	593	0.12	[0.03 0.19]	0.005	0.03
C9orf78	spearman correlation	two-sided	593	-0.12	[-0.2 -0.04]	0.004	0.03
OLFML3	spearman correlation	two-sided	593	-0.16	[-0.24 -0.08]	<0.0001	0.002
RACGAP1	spearman correlation	two-sided	593	0.15	[0.07 0.23]	0.0002	0.004
FANCI	spearman correlation	two-sided	593	0.12	[0.04 0.2 ]	0.004	0.03
RBL2	spearman correlation	two-sided	593	-0.13	[-0.21 -0.05]	0.002	0.02
PCIF1	spearman correlation	two-sided	593	-0.13	[-0.21 -0.05]	0.001	0.01
RIN2	spearman correlation	two-sided	593	-0.12	[-0.19 -0.04]	0.005	0.03
LARP4	spearman correlation	two-sided	593	0.14	[0.06 0.21]	0.0009	0.01
FOXA3	spearman correlation	two-sided	593	0.15	[0.07 0.23]	0.0002	0.004
TMEM127	spearman correlation	two-sided	593	-0.13	[-0.21 -0.05]	0.001	0.01
ASH1L	spearman correlation	two-sided	593	-0.12	[-0.2 -0.04]	0.003	0.02
GOLGA2	spearman correlation	two-sided	593	-0.11	[-0.19 -0.03]	0.006	0.03
C12orf23	spearman correlation	two-sided	593	0.15	[0.08 0.23]	0.0002	0.003
MBTPS1	spearman correlation	two-sided	593	-0.11	[-0.19 -0.03]	0.009	0.046
CECR5	spearman correlation	two-sided	593	0.12	[0.04 0.2 ]	0.004	0.03
PDLIM3	spearman correlation	two-sided	593	-0.17	[-0.25 -0.09]	<0.0001	0.001
GTF2A2	spearman correlation	two-sided	593	0.18	[0.1 0.25]	<0.0001	0.0009
SNHG1	spearman correlation	two-sided	593	0.11	[0.03 0.19]	0.006	0.04
FRZB	spearman correlation	two-sided	593	-0.13	[-0.21 -0.05]	0.001	0.01
MLL	spearman correlation	two-sided	593	-0.12	[-0.2 -0.04]	0.003	0.02
TMEM200A	spearman correlation	two-sided	593	-0.12	[-0.2 -0.04]	0.004	0.03
LMBRD1	spearman correlation	two-sided	593	-0.11	[-0.19 -0.03]	0.009	0.047
SDF2L1	spearman correlation	two-sided	593	0.13	[0.05 0.21]	0.002	0.02
DPY19L4	spearman correlation	two-sided	593	-0.11	[-0.19 -0.03]	0.008	0.04
HIBADH	spearman correlation	two-sided	593	-0.13	[-0.21 -0.05]	0.002	0.02
PACS1	spearman correlation	two-sided	593	-0.18	[-0.25 -0.1 ]	<0.0001	0.0009
PFKM	spearman correlation	two-sided	593	0.12	[0.04 0.2 ]	0.003	0.02
EGFR	spearman correlation	two-sided	593	-0.14	[-0.22 -0.06]	0.0007	0.008
ZNF117	spearman correlation	two-sided	593	-0.16	[-0.24 -0.08]	<0.0001	0.002
NOP2	spearman correlation	two-sided	593	0.12	[0.04 0.2 ]	0.003	0.02
PTTG1	spearman correlation	two-sided	593	0.18	[0.1 0.26]	<0.0001	0.0007
WBP11	spearman correlation	two-sided	593	0.12	[0.04 0.2 ]	0.004	0.03
NAA15	spearman correlation	two-sided	593	0.13	[0.05 0.21]	0.002	0.02
BAK1	spearman correlation	two-sided	593	0.17	[0.09 0.25]	<0.0001	0.001
C7	spearman correlation	two-sided	593	-0.16	[-0.24 -0.08]	<0.0001	0.002
WDR18	spearman correlation	two-sided	593	0.13	[0.05 0.21]	0.001	0.01
LIMS2	spearman correlation	two-sided	593	-0.17	[-0.25 -0.09]	<0.0001	0.001
TEAD1	spearman correlation	two-sided	593	-0.13	[-0.21 -0.05]	0.001	0.01
NEK3	spearman correlation	two-sided	593	-0.11	[-0.19 -0.03]	0.008	0.04
USP14	spearman correlation	two-sided	593	0.13	[0.05 0.21]	0.002	0.02
OXR1	spearman correlation	two-sided	593	-0.12	[-0.2 -0.04]	0.003	0.02
METAP1	spearman correlation	two-sided	593	0.12	[0.04 0.2 ]	0.003	0.02
SNRPD3	spearman correlation	two-sided	593	0.11	[0.03 0.19]	0.009	0.046
PHLDA3	spearman correlation	two-sided	593	-0.11	[-0.19 -0.03]	0.007	0.04
MORC4	spearman correlation	two-sided	593	0.11	[0.03 0.19]	0.006	0.03
TGIF2	spearman correlation	two-sided	593	-0.11	[-0.19 -0.03]	0.007	0.04
WIPF1	spearman correlation	two-sided	593	-0.11	[-0.19 -0.03]	0.009	0.048
EDN1	spearman correlation	two-sided	593	-0.11	[-0.19 -0.03]	0.008	0.04
RNF126	spearman correlation	two-sided	593	0.15	[0.07 0.22]	0.0004	0.006
GUCY1A3	spearman correlation	two-sided	593	-0.15	[-0.23 -0.07]	0.0003	0.005
WIPI2	spearman correlation	two-sided	593	-0.12	[-0.2 -0.04]	0.004	0.03
MRPL42	spearman correlation	two-sided	593	0.14	[0.06 0.22]	0.0006	0.008
EPDR1	spearman correlation	two-sided	593	-0.14	[-0.22 -0.06]	0.0005	0.006
NUCB2	spearman correlation	two-sided	593	0.13	[0.05 0.21]	0.002	0.02
CHD6	spearman correlation	two-sided	593	-0.16	[-0.24 -0.08]	<0.0001	0.002
FKBP11	spearman correlation	two-sided	593	0.13	[0.05 0.21]	0.002	0.02
MSRB3	spearman correlation	two-sided	593	-0.15	[-0.23 -0.07]	0.0002	0.004
FOXN3	spearman correlation	two-sided	593	-0.17	[-0.25 -0.09]	<0.0001	0.001
PKMYT1	spearman correlation	two-sided	593	0.11	[0.03 0.19]	0.009	0.046
NDRG3	spearman correlation	two-sided	593	-0.11	[-0.19 -0.03]	0.008	0.04
MFAP2	spearman correlation	two-sided	593	-0.12	[-0.2 -0.04]	0.003	0.02
HDAC5	spearman correlation	two-sided	593	-0.17	[-0.25 -0.09]	<0.0001	0.001
MAP1A	spearman correlation	two-sided	593	-0.15	[-0.23 -0.07]	0.0002	0.004
DTYMK	spearman correlation	two-sided	593	0.12	[0.04 0.19]	0.005	0.03
TRANK1	spearman correlation	two-sided	593	-0.12	[-0.2 -0.04]	0.004	0.03
ALKBH5	spearman correlation	two-sided	593	0.12	[0.04 0.2 ]	0.004	0.03
FAM108A1	spearman correlation	two-sided	593	0.12	[0.04 0.2 ]	0.003	0.02
LSMD1	spearman correlation	two-sided	593	0.14	[0.06 0.22]	0.0005	0.007
NCOA3	spearman correlation	two-sided	593	-0.14	[-0.22 -0.06]	0.0005	0.007
SCO2	spearman correlation	two-sided	593	0.15	[0.07 0.23]	0.0002	0.004
MYO19	spearman correlation	two-sided	593	0.11	[0.03 0.19]	0.007	0.04
CHRDL1	spearman correlation	two-sided	593	-0.17	[-0.25 -0.09]	<0.0001	0.001
MRPL16	spearman correlation	two-sided	593	0.15	[0.07 0.23]	0.0002	0.003
DCHS1	spearman correlation	two-sided	593	-0.13	[-0.21 -0.05]	0.002	0.02
UGT8	spearman correlation	two-sided	593	0.15	[0.07 0.23]	0.0003	0.005
ANKRD27	spearman correlation	two-sided	593	-0.12	[-0.2 -0.04]	0.004	0.03
UBE2M	spearman correlation	two-sided	593	0.15	[0.07 0.23]	0.0003	0.005
EXOC4	spearman correlation	two-sided	593	-0.17	[-0.25 -0.09]	<0.0001	0.001
NDUFB6	spearman correlation	two-sided	593	0.12	[0.04 0.2 ]	0.003	0.02
TSR1	spearman correlation	two-sided	593	0.12	[0.04 0.2 ]	0.004	0.03
ELAC2	spearman correlation	two-sided	593	0.12	[0.04 0.2 ]	0.003	0.02
PODN	spearman correlation	two-sided	593	-0.17	[-0.25 -0.09]	<0.0001	0.001
CD2BP2	spearman correlation	two-sided	593	-0.12	[-0.2 -0.04]	0.004	0.03
CST6	spearman correlation	two-sided	593	-0.12	[-0.2 -0.04]	0.003	0.02
KIAA1429	spearman correlation	two-sided	593	-0.13	[-0.21 -0.05]	0.002	0.02
ENTPD1	spearman correlation	two-sided	593	-0.13	[-0.2 -0.05]	0.002	0.02
STRA6	spearman correlation	two-sided	593	-0.18	[-0.26 -0.1 ]	<0.0001	0.0005
HBP1	spearman correlation	two-sided	593	-0.14	[-0.21 -0.06]	0.001	0.01
DOCK1	spearman correlation	two-sided	593	-0.18	[-0.25 -0.1 ]	<0.0001	0.0009
DNM1L	spearman correlation	two-sided	593	0.11	[0.03 0.19]	0.009	0.048
MRPL17	spearman correlation	two-sided	593	0.11	[0.03 0.19]	0.009	0.048
PHYH	spearman correlation	two-sided	593	-0.11	[-0.19 -0.03]	0.006	0.03
MAPK1IP1L	spearman correlation	two-sided	593	0.15	[0.07 0.23]	0.0003	0.005
FEN1	spearman correlation	two-sided	593	0.16	[0.08 0.24]	<0.0001	0.002
PCCB	spearman correlation	two-sided	593	0.13	[0.05 0.21]	0.001	0.01
ENPP2	spearman correlation	two-sided	593	-0.15	[-0.23 -0.07]	0.0002	0.004
GIGYF2	spearman correlation	two-sided	593	-0.11	[-0.19 -0.03]	0.008	0.04
FOLR1	spearman correlation	two-sided	593	-0.11	[-0.19 -0.03]	0.006	0.03
TGFBR1	spearman correlation	two-sided	593	-0.12	[-0.2 -0.04]	0.003	0.02
RSU1	spearman correlation	two-sided	593	-0.16	[-0.23 -0.08]	0.0001	0.003
TXNDC17	spearman correlation	two-sided	593	0.14	[0.06 0.22]	0.0005	0.007
TAF1	spearman correlation	two-sided	593	-0.13	[-0.21 -0.05]	0.001	0.01
MRPL21	spearman correlation	two-sided	593	0.11	[0.03 0.18]	0.01	0.0496
C6orf89	spearman correlation	two-sided	593	-0.13	[-0.21 -0.05]	0.001	0.01
MARVELD1	spearman correlation	two-sided	593	-0.15	[-0.23 -0.07]	0.0003	0.005
SATB1	spearman correlation	two-sided	593	-0.12	[-0.2 -0.04]	0.004	0.03
MAN2B2	spearman correlation	two-sided	593	-0.11	[-0.19 -0.03]	0.009	0.046
TNXB	spearman correlation	two-sided	593	-0.2	[-0.28 -0.13]	<0.0001	<0.0001
SEH1L	spearman correlation	two-sided	593	0.17	[0.09 0.24]	<0.0001	0.002
TCEAL4	spearman correlation	two-sided	593	-0.14	[-0.22 -0.06]	0.0005	0.007
KIDINS220	spearman correlation	two-sided	593	-0.22	[-0.29 -0.14]	<0.0001	<0.0001
MFRP	spearman correlation	two-sided	593	-0.13	[-0.21 -0.05]	0.001	0.01
CCDC85C	spearman correlation	two-sided	593	0.16	[0.08 0.24]	<0.0001	0.002
EPT1	spearman correlation	two-sided	593	0.11	[0.03 0.19]	0.009	0.046
IQSEC1	spearman correlation	two-sided	593	-0.12	[-0.2 -0.04]	0.004	0.03
BCL10	spearman correlation	two-sided	593	0.14	[0.06 0.22]	0.0006	0.008
NXPH4	spearman correlation	two-sided	593	0.19	[0.11 0.26]	<0.0001	0.0004
KIF11	spearman correlation	two-sided	593	0.12	[0.04 0.2 ]	0.004	0.03
PGM5	spearman correlation	two-sided	593	-0.18	[-0.26 -0.11]	<0.0001	0.0005
LEPROTL1	spearman correlation	two-sided	593	0.12	[0.04 0.2 ]	0.004	0.03
RAB11FIP3	spearman correlation	two-sided	593	-0.13	[-0.2 -0.05]	0.002	0.02
DYNC1I2	spearman correlation	two-sided	593	-0.17	[-0.24 -0.09]	<0.0001	0.001
YDJC	spearman correlation	two-sided	593	0.11	[0.03 0.19]	0.005	0.03
SPG11	spearman correlation	two-sided	593	-0.11	[-0.19 -0.03]	0.005	0.03
BCOR	spearman correlation	two-sided	593	-0.13	[-0.2 -0.05]	0.002	0.02
SLC25A22	spearman correlation	two-sided	593	0.18	[0.11 0.26]	<0.0001	0.0005
PIK3IP1	spearman correlation	two-sided	593	-0.2	[-0.28 -0.12]	<0.0001	<0.0001
RPS6KB2	spearman correlation	two-sided	593	0.15	[0.07 0.23]	0.0003	0.005
NCS1	spearman correlation	two-sided	593	-0.11	[-0.19 -0.03]	0.006	0.03
SAA2	spearman correlation	two-sided	593	0.13	[0.05 0.21]	0.002	0.02
NAV1	spearman correlation	two-sided	593	-0.12	[-0.2 -0.04]	0.004	0.03
KIAA0430	spearman correlation	two-sided	593	-0.13	[-0.21 -0.05]	0.001	0.01
COPS3	spearman correlation	two-sided	593	0.14	[0.06 0.22]	0.0006	0.007
MEGF8	spearman correlation	two-sided	593	-0.11	[-0.19 -0.03]	0.009	0.045
STAT5B	spearman correlation	two-sided	593	-0.17	[-0.25 -0.09]	<0.0001	0.001
PHF20	spearman correlation	two-sided	593	-0.14	[-0.22 -0.06]	0.0006	0.007
ZCCHC14	spearman correlation	two-sided	593	-0.12	[-0.2 -0.04]	0.003	0.02
FERMT2	spearman correlation	two-sided	593	-0.12	[-0.19 -0.04]	0.005	0.03
MED29	spearman correlation	two-sided	593	-0.13	[-0.2 -0.05]	0.002	0.02
MPHOSPH8	spearman correlation	two-sided	593	-0.12	[-0.2 -0.04]	0.004	0.03
MT1X	spearman correlation	two-sided	593	0.13	[0.05 0.21]	0.001	0.01
TBC1D5	spearman correlation	two-sided	593	-0.15	[-0.23 -0.07]	0.0003	0.005
FAM65A	spearman correlation	two-sided	593	-0.11	[-0.19 -0.03]	0.007	0.04
DGAT2	spearman correlation	two-sided	593	-0.14	[-0.22 -0.06]	0.0005	0.007
CDCA5	spearman correlation	two-sided	593	0.15	[0.07 0.22]	0.0004	0.006
ZWINT	spearman correlation	two-sided	593	0.14	[0.06 0.21]	0.001	0.01
DDTL	spearman correlation	two-sided	593	0.14	[0.06 0.22]	0.0008	0.01
PIP4K2B	spearman correlation	two-sided	593	-0.18	[-0.25 -0.1 ]	<0.0001	0.0008
SPOCK1	spearman correlation	two-sided	593	-0.12	[-0.2 -0.04]	0.003	0.02
COQ4	spearman correlation	two-sided	593	0.12	[0.04 0.2 ]	0.004	0.03
FAM46C	spearman correlation	two-sided	593	0.12	[0.04 0.19]	0.005	0.03
AMOTL2	spearman correlation	two-sided	593	-0.14	[-0.22 -0.06]	0.0005	0.007
PTGDS	spearman correlation	two-sided	593	-0.11	[-0.19 -0.03]	0.009	0.046
LPL	spearman correlation	two-sided	593	-0.11	[-0.19 -0.03]	0.008	0.04
SLC39A11	spearman correlation	two-sided	593	-0.11	[-0.19 -0.03]	0.009	0.046
SETD2	spearman correlation	two-sided	593	-0.11	[-0.19 -0.03]	0.007	0.04
BCAT2	spearman correlation	two-sided	593	0.18	[0.1 0.26]	<0.0001	0.0006
NCOA5	spearman correlation	two-sided	593	-0.14	[-0.21 -0.06]	0.0009	0.01
GATAD1	spearman correlation	two-sided	593	-0.11	[-0.19 -0.03]	0.01	0.049
ZCCHC24	spearman correlation	two-sided	593	-0.16	[-0.24 -0.08]	<0.0001	0.002
ABCG1	spearman correlation	two-sided	593	-0.16	[-0.24 -0.08]	<0.0001	0.002
ARID1B	spearman correlation	two-sided	593	-0.16	[-0.24 -0.08]	<0.0001	0.002
C17orf61	spearman correlation	two-sided	593	0.13	[0.05 0.2 ]	0.002	0.02
TIMELESS	spearman correlation	two-sided	593	0.16	[0.08 0.23]	0.0001	0.003
FNBP1	spearman correlation	two-sided	593	-0.17	[-0.24 -0.09]	<0.0001	0.002
PGAM5	spearman correlation	two-sided	593	0.17	[0.09 0.25]	<0.0001	0.001
MRVI1	spearman correlation	two-sided	593	-0.16	[-0.23 -0.08]	0.0001	0.003
GGT5	spearman correlation	two-sided	593	-0.11	[-0.19 -0.03]	0.007	0.04
ATAD3B	spearman correlation	two-sided	593	0.16	[0.08 0.24]	<0.0001	0.002
PALM2-AKAP2	spearman correlation	two-sided	593	-0.17	[-0.25 -0.09]	<0.0001	0.001
SNRPD1	spearman correlation	two-sided	593	0.15	[0.07 0.22]	0.0004	0.006
ASRGL1	spearman correlation	two-sided	593	0.14	[0.06 0.22]	0.0004	0.006
CEP55	spearman correlation	two-sided	593	0.13	[0.05 0.21]	0.001	0.01
YIF1B	spearman correlation	two-sided	593	0.16	[0.08 0.24]	0.0001	0.003
WWC3	spearman correlation	two-sided	593	-0.16	[-0.24 -0.08]	<0.0001	0.002
KCNK1	spearman correlation	two-sided	593	0.13	[0.05 0.21]	0.002	0.02
PRODH	spearman correlation	two-sided	593	0.12	[0.04 0.2 ]	0.004	0.03
ARHGAP11A	spearman correlation	two-sided	593	0.13	[0.05 0.21]	0.002	0.02
RNF103	spearman correlation	two-sided	593	-0.14	[-0.22 -0.06]	0.0004	0.006
EEPD1	spearman correlation	two-sided	593	-0.11	[-0.19 -0.03]	0.009	0.047
NUP214	spearman correlation	two-sided	593	-0.12	[-0.2 -0.04]	0.003	0.02
AEN	spearman correlation	two-sided	593	0.18	[0.1 0.26]	<0.0001	0.0006
SLCO2A1	spearman correlation	two-sided	593	-0.14	[-0.22 -0.06]	0.0007	0.008
POLR2H	spearman correlation	two-sided	593	0.15	[0.07 0.23]	0.0003	0.005
ADM	spearman correlation	two-sided	593	0.21	[0.13 0.28]	<0.0001	<0.0001
